# Supplementary material for: Active Media Perfusion in Bioprinted Highly Concentrated Collagen Bioink Enhances the Viability of Cell Culture and Substrate Remodeling
Source: MDPI journal article supplement (doi:10.3390/gels10050316), 2024-05-05

**Biomechanical evaluation**  
**Test between collagen concentration**

**Variable: E\_03\_04 (Compression modulus  
(kPa))**

| Koncentrace_kolagen | Method        | N  | Mean     | Std Dev | Std Err | Minimum | Maximum |
|---------------------|---------------|----|----------|---------|---------|---------|---------|
| 20                  |               | 38 | 16.7350  | 8.4424  | 1.3695  | 6.1239  | 33.5466 |
| 30                  |               | 39 | 53.3419  | 22.0537 | 3.5314  | 19.8817 | 92.3457 |
| Diff (1-2)          | Pooled        |    | -36.6069 | 16.7806 | 3.8250  |         |         |
| Diff (1-2)          | Satterthwaite |    | -36.6069 |         | 3.7877  |         |         |

| Koncentrace_kolagen | Method        | Mean     | 95% CL Mean |          | Std Dev | 95% CL Std Dev |         |
|---------------------|---------------|----------|-------------|----------|---------|----------------|---------|
| 20                  |               | 16.7350  | 13.9601     | 19.5099  | 8.4424  | 6.8828         | 10.9223 |
| 30                  |               | 53.3419  | 46.1930     | 60.4909  | 22.0537 | 18.0233        | 28.4223 |
| Diff (1-2)          | Pooled        | -36.6069 | -44.2267    | -28.9872 | 16.7806 | 14.4718        | 19.9727 |
| Diff (1-2)          | Satterthwaite | -36.6069 | -44.2180    | -28.9959 |         |                |         |

| Method        | Variances | DF     | t Value | Pr >  t |
|---------------|-----------|--------|---------|---------|
| Pooled        | Equal     | 75     | -9.57   | <.0001  |
| Satterthwaite | Unequal   | 49.148 | -9.66   | <.0001  |

| Equality of Variances |        |        |         |        |
|-----------------------|--------|--------|---------|--------|
| Method                | Num DF | Den DF | F Value | Pr > F |
| Folded F              | 38     | 37     | 6.82    | <.0001 |

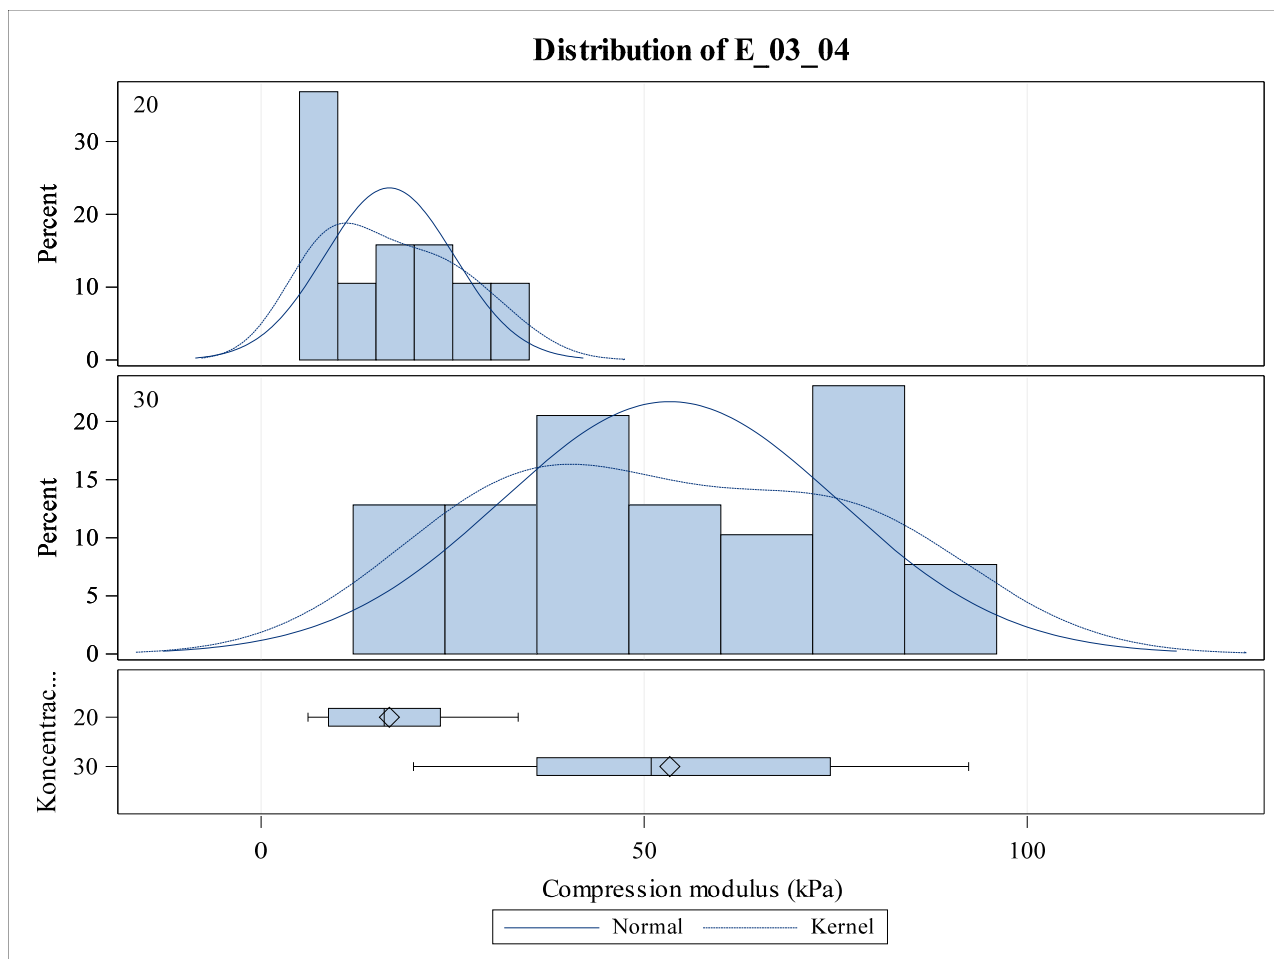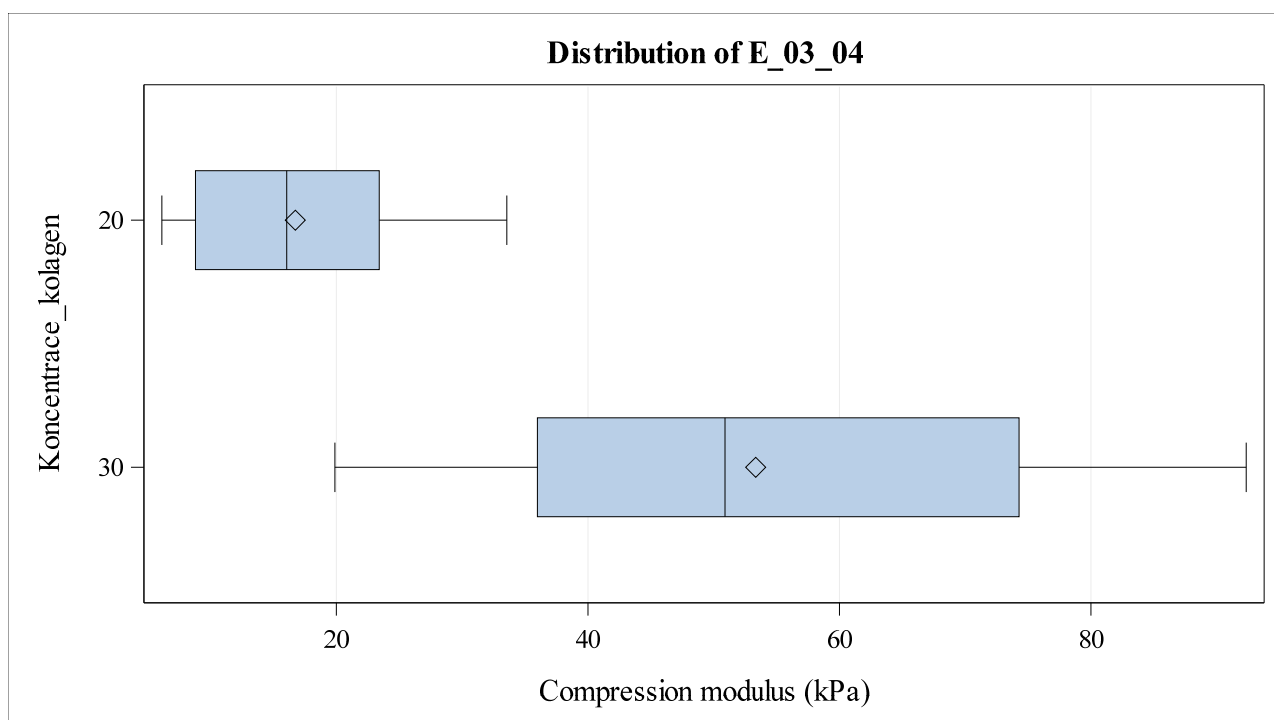

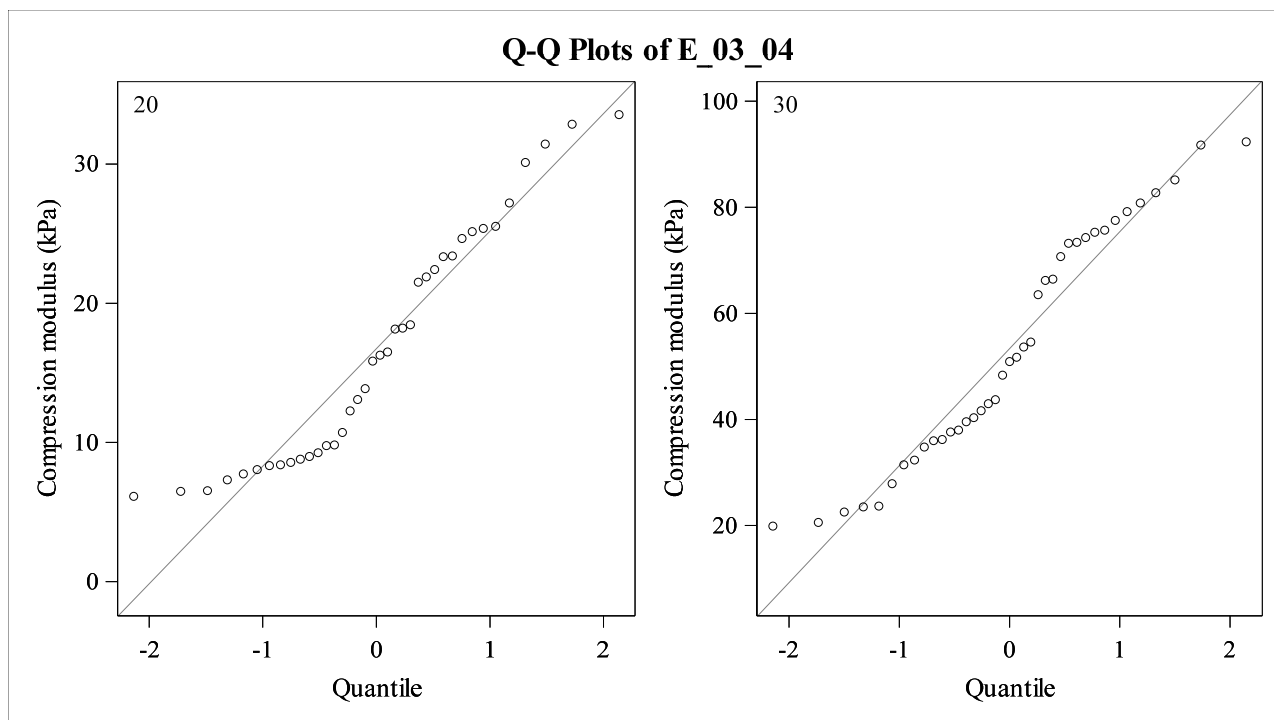

***Biomechanical evaluation***  
***Test between collagen concentration***

***Model: MODEL1***

***Dependent Variable: E\_03\_04 Compression modulus (kPa)***

**Collagen conc. (mg/ml)=20**

|                                    |    |
|------------------------------------|----|
| <b>Number of Observations Read</b> | 38 |
| <b>Number of Observations Used</b> | 38 |

***Stepwise Selection: Step 1***

***Variable inkubace\_new Entered: R-Square = 0.5558 and C(p) = 21.2751***

| <b>Analysis of Variance</b> |           |                       |                    |                |                  |
|-----------------------------|-----------|-----------------------|--------------------|----------------|------------------|
| <b>Source</b>               | <b>DF</b> | <b>Sum of Squares</b> | <b>Mean Square</b> | <b>F Value</b> | <b>Pr &gt; F</b> |
| <b>Model</b>                | 1         | 1465.71023            | 1465.71023         | 45.04          | <.0001           |
| <b>Error</b>                | 36        | 1171.41554            | 32.53932           |                |                  |
| <b>Corrected Total</b>      | 37        | 2637.12577            |                    |                |                  |

| Variable     | Parameter Estimate | Standard Error | Type II SS | F Value | Pr > F |
|--------------|--------------------|----------------|------------|---------|--------|
| Intercept    | 6.38402            | 1.79858        | 409.95499  | 12.60   | 0.0011 |
| inkubace_new | 4.14039            | 0.61691        | 1465.71023 | 45.04   | <.0001 |

**Bounds on condition number: 1, 1**

**Stepwise Selection: Step 2**

**Variable koncentre\_aa\_new Entered: R-Square = 0.6516 and C(p) = 11.3529**

| Analysis of Variance |    |                |             |         |        |
|----------------------|----|----------------|-------------|---------|--------|
| Source               | DF | Sum of Squares | Mean Square | F Value | Pr > F |
| Model                | 2  | 1718.37127     | 859.18564   | 32.73   | <.0001 |
| Error                | 35 | 918.75450      | 26.25013    |         |        |
| Corrected Total      | 37 | 2637.12577     |             |         |        |

| Variable         | Parameter Estimate | Standard Error | Type II SS | F Value | Pr > F |
|------------------|--------------------|----------------|------------|---------|--------|
| Intercept        | 13.99454           | 2.93722        | 595.90503  | 22.70   | <.0001 |
| koncentre_aa_new | -5.16428           | 1.66459        | 252.66104  | 9.63    | 0.0038 |
| inkubace_new     | 4.14039            | 0.55409        | 1465.71023 | 55.84   | <.0001 |

**Bounds on condition number: 1, 4**

**Stepwise Selection: Step 3**

**Variable phnum Entered: R-Square = 0.7268 and C(p) = 4.0000**

| Analysis of Variance |    |                |             |         |        |
|----------------------|----|----------------|-------------|---------|--------|
| Source               | DF | Sum of Squares | Mean Square | F Value | Pr > F |
| Model                | 3  | 1916.58146     | 638.86049   | 30.15   | <.0001 |
| Error                | 34 | 720.54431      | 21.19248    |         |        |
| Corrected Total      | 37 | 2637.12577     |             |         |        |

| Variable           | Parameter Estimate | Standard Error | Type II SS | F Value | Pr > F |
|--------------------|--------------------|----------------|------------|---------|--------|
| Intercept          | 11.44946           | 2.76723        | 362.79389  | 17.12   | 0.0002 |
| koncentrace_aa_new | -4.90977           | 1.49797        | 227.66632  | 10.74   | 0.0024 |
| phnum              | 4.58115            | 1.49797        | 198.21019  | 9.35    | 0.0043 |
| inkubace_new       | 4.14039            | 0.49786        | 1465.71023 | 69.16   | <.0001 |

**Bounds on condition number: 1.0031, 9.0186**

**All variables left in the model are significant at the 0.1500 level.**

**All variables have been entered into the model.**

| Summary of Stepwise Selection |                    |                  |                                        |                |                  |                |         |         |        |
|-------------------------------|--------------------|------------------|----------------------------------------|----------------|------------------|----------------|---------|---------|--------|
| Step                          | Variable Entered   | Variable Removed | Label                                  | Number Vars In | Partial R-Square | Model R-Square | C(p)    | F Value | Pr > F |
| 1                             | inkubace_new       |                  | Incubation time (1: 15 min; 4: 60 min) | 1              | 0.5558           | 0.5558         | 21.2751 | 45.04   | <.0001 |
| 2                             | koncentrace_aa_new |                  | Acetic acid conc. (1:0.05%; 2:0.1%)    | 2              | 0.0958           | 0.6516         | 11.3529 | 9.63    | 0.0038 |
| 3                             | phnum              |                  | pH-num                                 | 3              | 0.0752           | 0.7268         | 4.0000  | 9.35    | 0.0043 |

**Model: MODEL1**

**Dependent Variable: E\_03\_04 Compression modulus (kPa)**

Collagen conc. (mg/ml)=20

### Fit Diagnostics for E\_03\_04

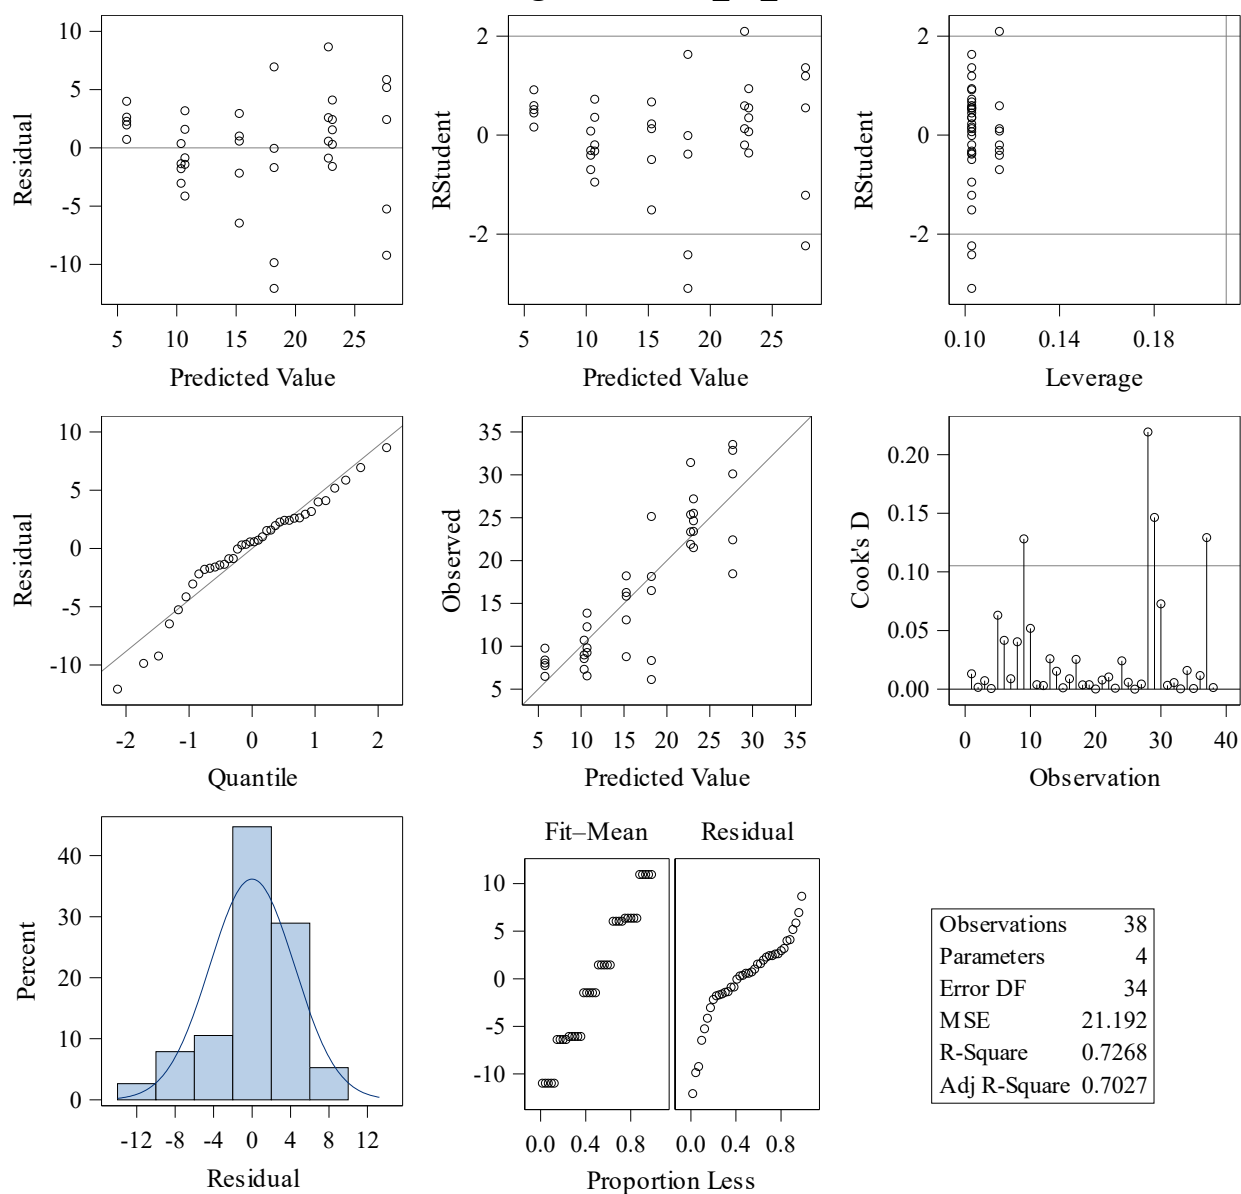

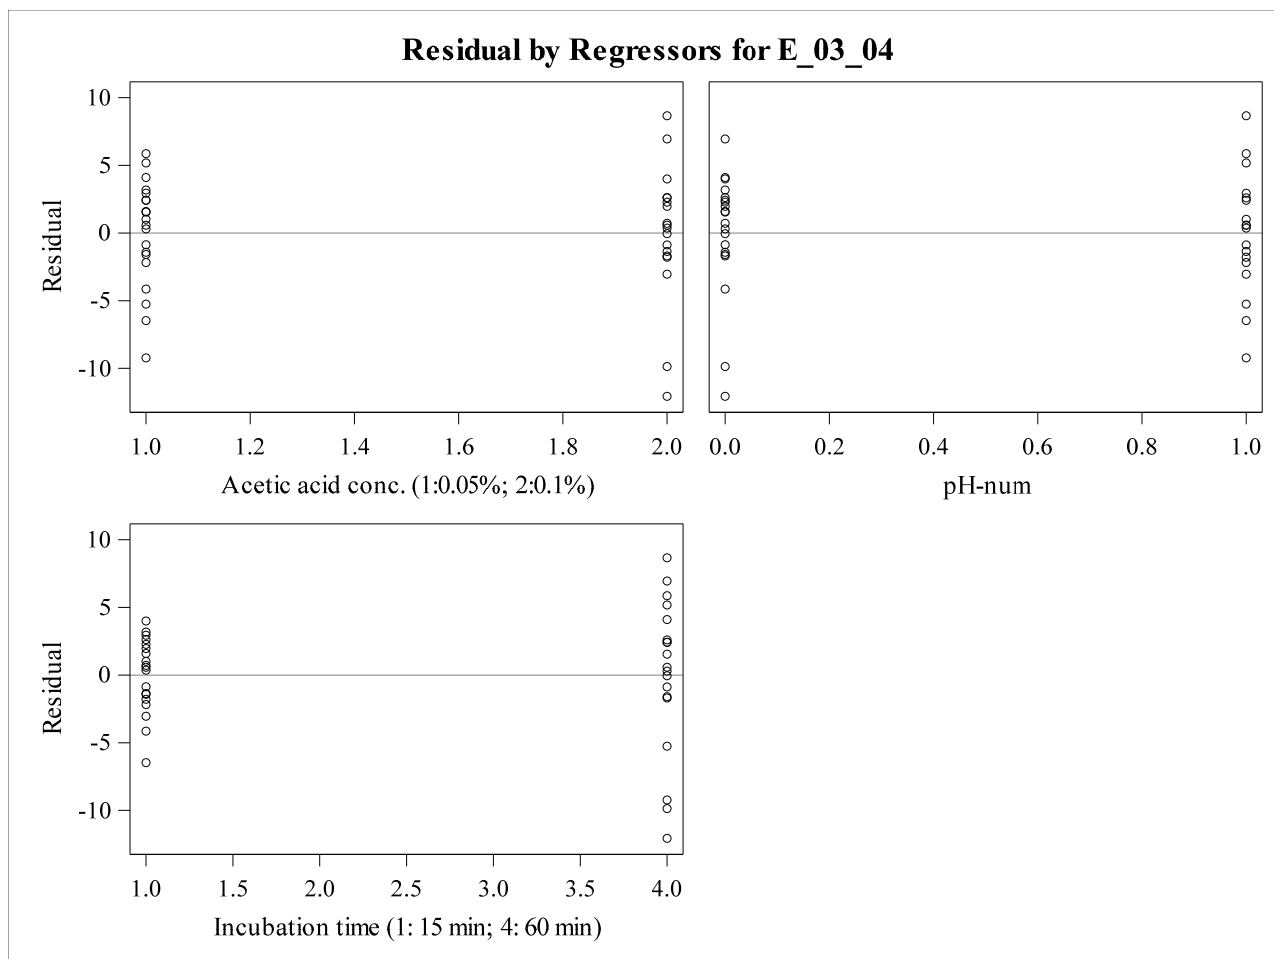

**Model: MODEL1**

**Dependent Variable: E\_03\_04 Compression modulus (kPa)**

**Collagen conc. (mg/ml)=30**

|                                    |    |
|------------------------------------|----|
| <b>Number of Observations Read</b> | 39 |
| <b>Number of Observations Used</b> | 39 |

**Stepwise Selection: Step 1**

**Variable inkubace\_new Entered: R-Square = 0.6651 and C(p) = 44.9329**

| Analysis of Variance   |    |                |             |         |        |
|------------------------|----|----------------|-------------|---------|--------|
| Source                 | DF | Sum of Squares | Mean Square | F Value | Pr > F |
| <b>Model</b>           | 1  | 12293          | 12293       | 73.49   | <.0001 |
| <b>Error</b>           | 37 | 6188.91101     | 167.26787   |         |        |
| <b>Corrected Total</b> | 38 | 18482          |             |         |        |

| Variable            | Parameter Estimate | Standard Error | Type II SS | F Value | Pr > F |
|---------------------|--------------------|----------------|------------|---------|--------|
| <b>Intercept</b>    | 23.28682           | 4.07186        | 5470.75045 | 32.71   | <.0001 |
| <b>inkubace_new</b> | 11.83989           | 1.38110        | 12293      | 73.49   | <.0001 |

*Bounds on condition number: 1, 1*

*Stepwise Selection: Step 2*

*Variable kontrace\_aa\_new Entered: R-Square = 0.8008 and C(p) = 14.5424*

| Analysis of Variance   |    |                |             |         |        |
|------------------------|----|----------------|-------------|---------|--------|
| Source                 | DF | Sum of Squares | Mean Square | F Value | Pr > F |
| <b>Model</b>           | 2  | 14801          | 7400.42499  | 72.38   | <.0001 |
| <b>Error</b>           | 36 | 3681.03934     | 102.25109   |         |        |
| <b>Corrected Total</b> | 38 | 18482          |             |         |        |

| Variable               | Parameter Estimate | Standard Error | Type II SS | F Value | Pr > F |
|------------------------|--------------------|----------------|------------|---------|--------|
| <b>Intercept</b>       | 46.79696           | 5.71587        | 6853.90289 | 67.03   | <.0001 |
| <b>kontrace_aa_new</b> | -16.04884          | 3.24060        | 2507.87167 | 24.53   | <.0001 |
| <b>inkubace_new</b>    | 11.98067           | 1.08020        | 12578      | 123.01  | <.0001 |

*Bounds on condition number: 1.0007, 4.0028*

*Stepwise Selection: Step 3*

*Variable phnum Entered: R-Square = 0.8534 and C(p) = 4.0000*

| Analysis of Variance   |    |                |             |         |        |
|------------------------|----|----------------|-------------|---------|--------|
| Source                 | DF | Sum of Squares | Mean Square | F Value | Pr > F |
| <b>Model</b>           | 3  | 15772          | 5257.32208  | 67.90   | <.0001 |
| <b>Error</b>           | 35 | 2709.92306     | 77.42637    |         |        |
| <b>Corrected Total</b> | 38 | 18482          |             |         |        |



| Variable           | Parameter Estimate | Standard Error | Type II SS | F Value | Pr > F |
|--------------------|--------------------|----------------|------------|---------|--------|
| Intercept          | 41.84674           | 5.16653        | 5079.43093 | 65.60   | <.0001 |
| koncentrace_aa_new | -16.31885          | 2.82094        | 2591.07443 | 33.47   | <.0001 |
| phnum              | 9.99045            | 2.82094        | 971.11628  | 12.54   | 0.0011 |
| inkubace_new       | 12.07068           | 0.94031        | 12759      | 164.78  | <.0001 |

***Bounds on condition number: 1.0014, 9.0128***

***All variables left in the model are significant at the 0.1500 level.***

***All variables have been entered into the model.***

| Summary of Stepwise Selection |                    |                  |                                        |                |                  |                |         |         |        |
|-------------------------------|--------------------|------------------|----------------------------------------|----------------|------------------|----------------|---------|---------|--------|
| Step                          | Variable Entered   | Variable Removed | Label                                  | Number Vars In | Partial R-Square | Model R-Square | C(p)    | F Value | Pr > F |
| 1                             | inkubace_new       |                  | Incubation time (1: 15 min; 4: 60 min) | 1              | 0.6651           | 0.6651         | 44.9329 | 73.49   | <.0001 |
| 2                             | koncentrace_aa_new |                  | Acetic acid conc. (1:0.05%; 2:0.1%)    | 2              | 0.1357           | 0.8008         | 14.5424 | 24.53   | <.0001 |
| 3                             | phnum              |                  | pH-num                                 | 3              | 0.0525           | 0.8534         | 4.0000  | 12.54   | 0.0011 |

***Model: MODEL1***

***Dependent Variable: E\_03\_04 Compression modulus (kPa)***

Collagen conc. (mg/ml)=30

### Fit Diagnostics for E\_03\_04

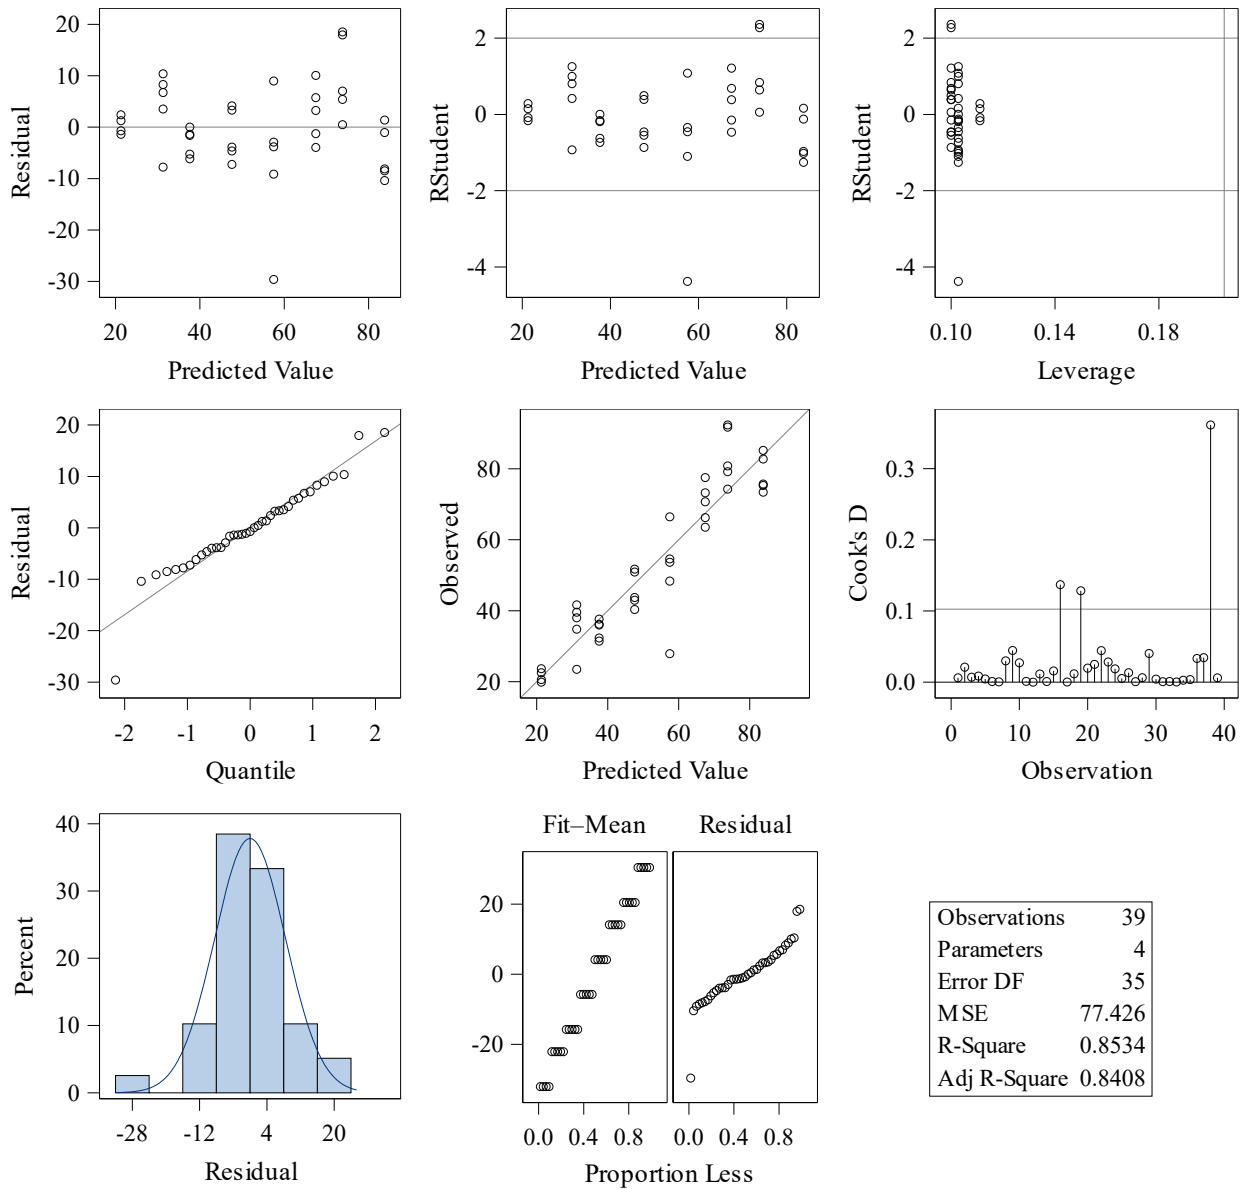

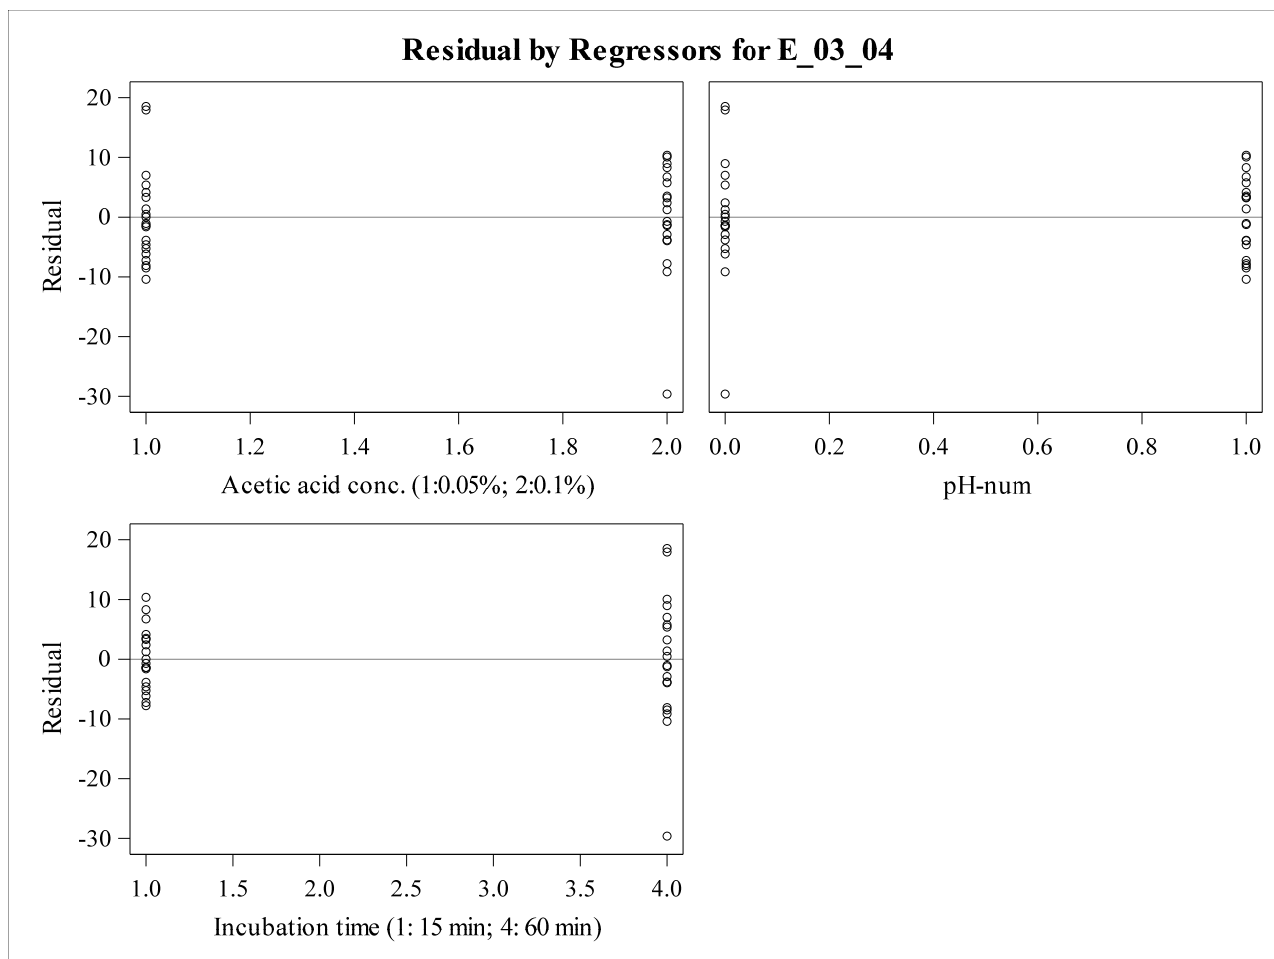

***Biomechanical evaluation***  
***Test between collagen concentration***

***Variable:***  
***Area***

| Concentration | Method        | N  | Mean     | Std Dev | Std Err | Minimum | Maximum |
|---------------|---------------|----|----------|---------|---------|---------|---------|
| 20            |               | 40 | 117.7    | 46.7145 | 7.3862  | 54.8700 | 201.6   |
| 30            |               | 40 | 174.8    | 22.8788 | 3.6175  | 125.3   | 204.5   |
| Diff (1-2)    | Pooled        |    | -57.1453 | 36.7810 | 8.2245  |         |         |
| Diff (1-2)    | Satterthwaite |    | -57.1453 |         | 8.2245  |         |         |

| Concentration | Method        | Mean     | 95% CL Mean |          | Std Dev | 95% CL Std Dev |         |
|---------------|---------------|----------|-------------|----------|---------|----------------|---------|
| 20            |               | 117.7    | 102.7       | 132.6    | 46.7145 | 38.2667        | 59.9830 |
| 30            |               | 174.8    | 167.5       | 182.2    | 22.8788 | 18.7414        | 29.3772 |
| Diff (1-2)    | Pooled        | -57.1453 | -73.5189    | -40.7716 | 36.7810 | 31.8050        | 43.6173 |
| Diff (1-2)    | Satterthwaite | -57.1453 | -73.6164    | -40.6741 |         |                |         |

| Method        | Variances | DF     | t Value | Pr >  t |
|---------------|-----------|--------|---------|---------|
| Pooled        | Equal     | 78     | -6.95   | <.0001  |
| Satterthwaite | Unequal   | 56.691 | -6.95   | <.0001  |

| Equality of Variances |        |        |         |        |
|-----------------------|--------|--------|---------|--------|
| Method                | Num DF | Den DF | F Value | Pr > F |
| Folded F              | 39     | 39     | 4.17    | <.0001 |

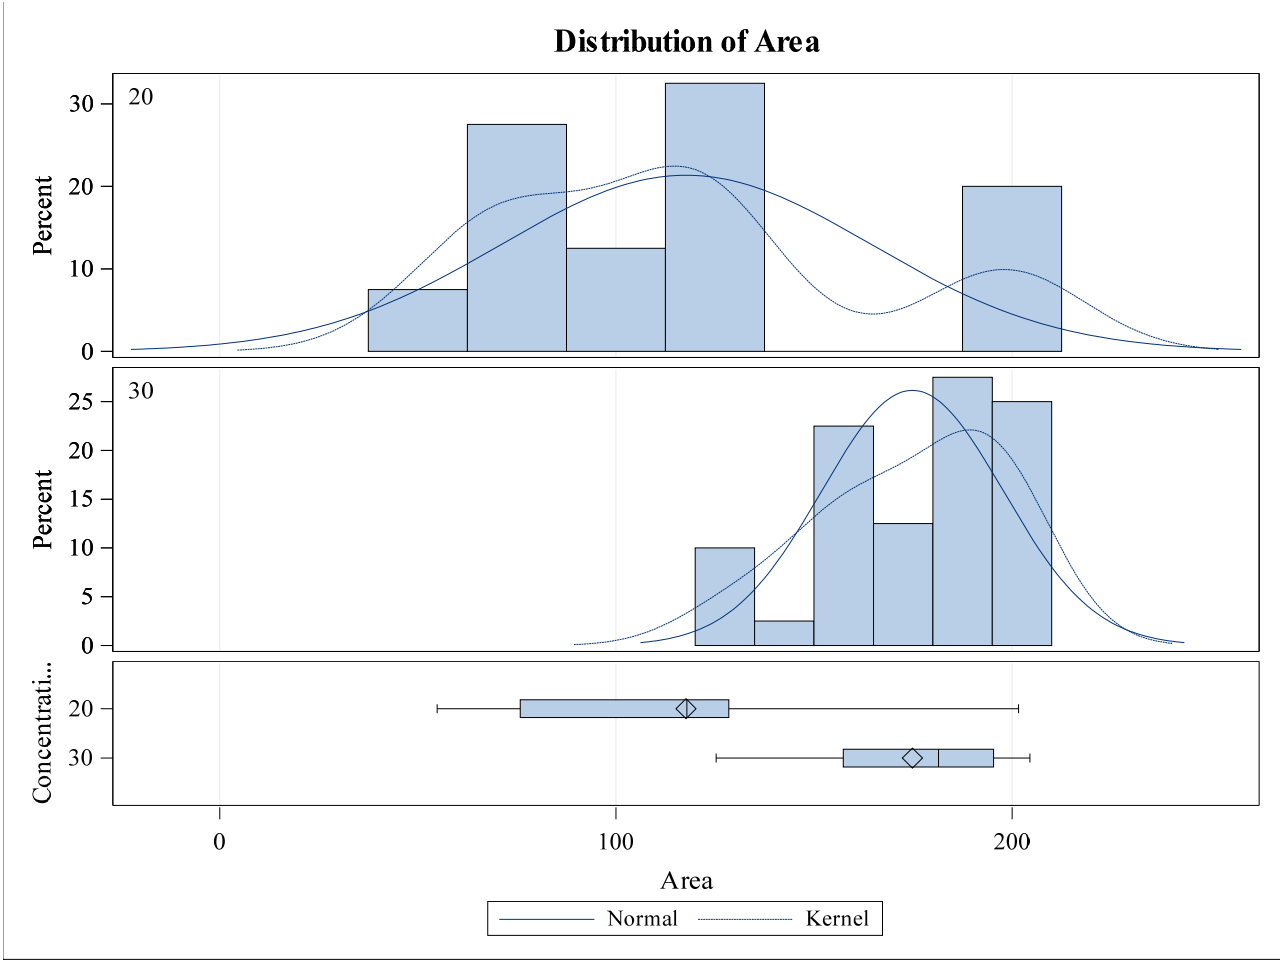

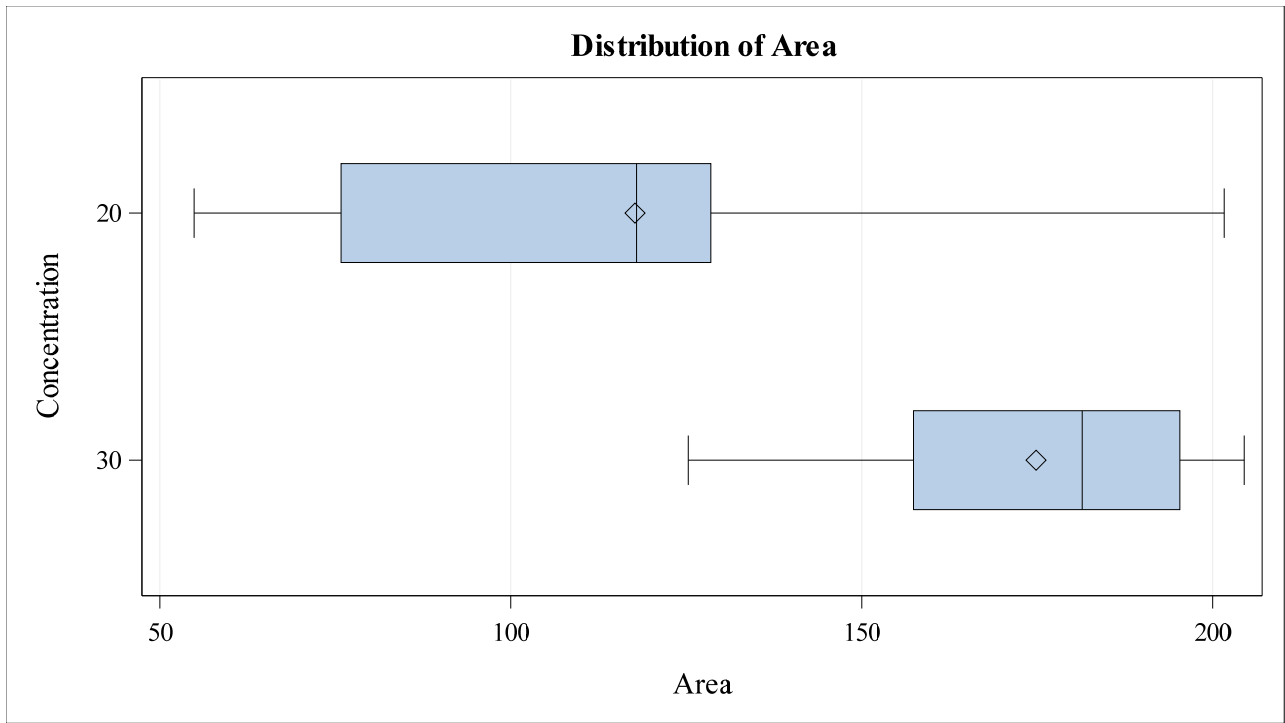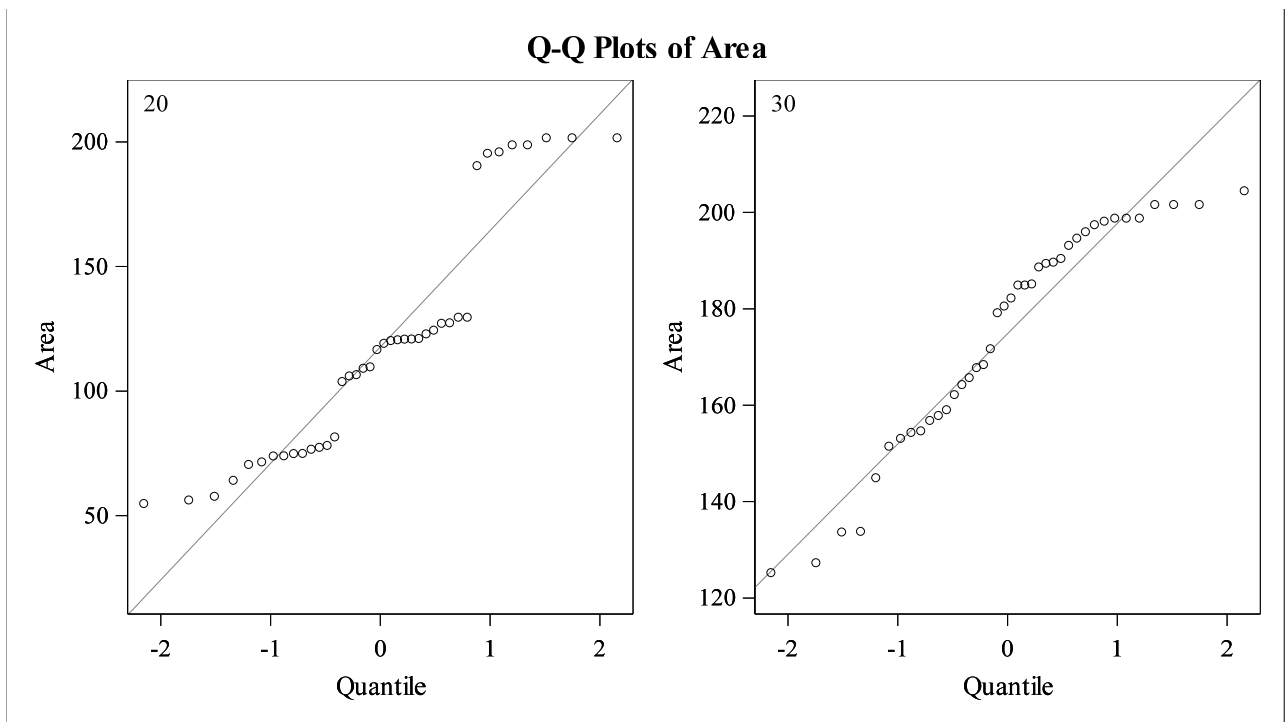

***Biomechanical evaluation***  
***Test between collagen concentration***

***Variable:***  
***Height***

| Concentration | Method        | N  | Mean    | Std Dev | Std Err | Minimum | Maximum |
|---------------|---------------|----|---------|---------|---------|---------|---------|
| 20            |               | 40 | 1.0740  | 0.1201  | 0.0190  | 0.8100  | 1.2400  |
| 30            |               | 40 | 1.1388  | 0.0677  | 0.0107  | 0.9500  | 1.2400  |
| Diff (1-2)    | Pooled        |    | -0.0647 | 0.0975  | 0.0218  |         |         |
| Diff (1-2)    | Satterthwaite |    | -0.0647 |         | 0.0218  |         |         |

| Concentration | Method        | Mean    | 95% CL Mean |         | Std Dev | 95% CL Std Dev |        |
|---------------|---------------|---------|-------------|---------|---------|----------------|--------|
| 20            |               | 1.0740  | 1.0356      | 1.1124  | 0.1201  | 0.0984         | 0.1542 |
| 30            |               | 1.1388  | 1.1171      | 1.1604  | 0.0677  | 0.0554         | 0.0869 |
| Diff (1-2)    | Pooled        | -0.0647 | -0.1081     | -0.0214 | 0.0975  | 0.0843         | 0.1156 |
| Diff (1-2)    | Satterthwaite | -0.0647 | -0.1083     | -0.0212 |         |                |        |

| Method        | Variances | DF   | t Value | Pr >  t |
|---------------|-----------|------|---------|---------|
| Pooled        | Equal     | 78   | -2.97   | 0.0039  |
| Satterthwaite | Unequal   | 61.5 | -2.97   | 0.0042  |

| Equality of Variances |        |        |         |        |
|-----------------------|--------|--------|---------|--------|
| Method                | Num DF | Den DF | F Value | Pr > F |
| Folded F              | 39     | 39     | 3.15    | 0.0005 |

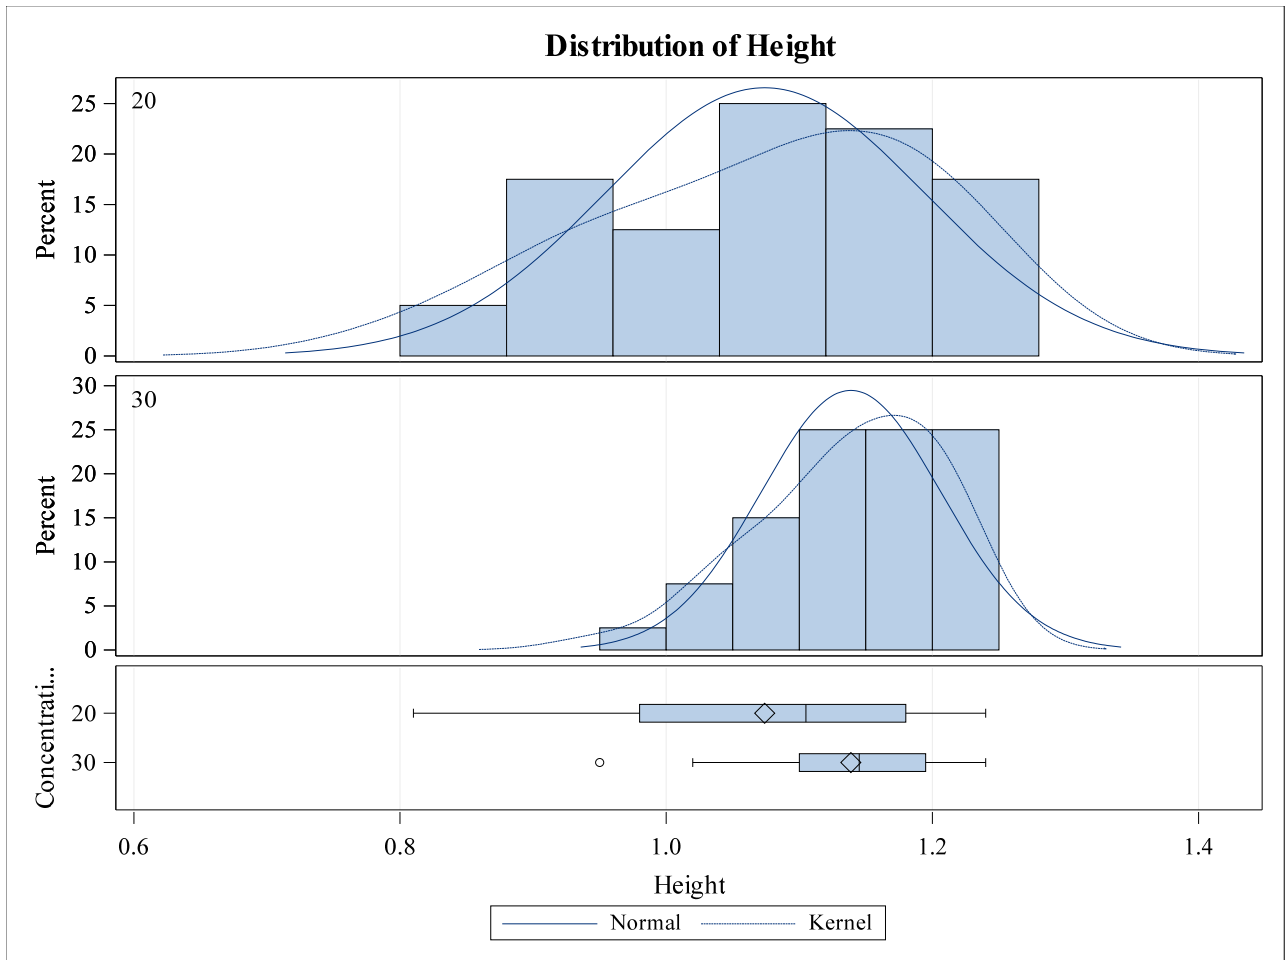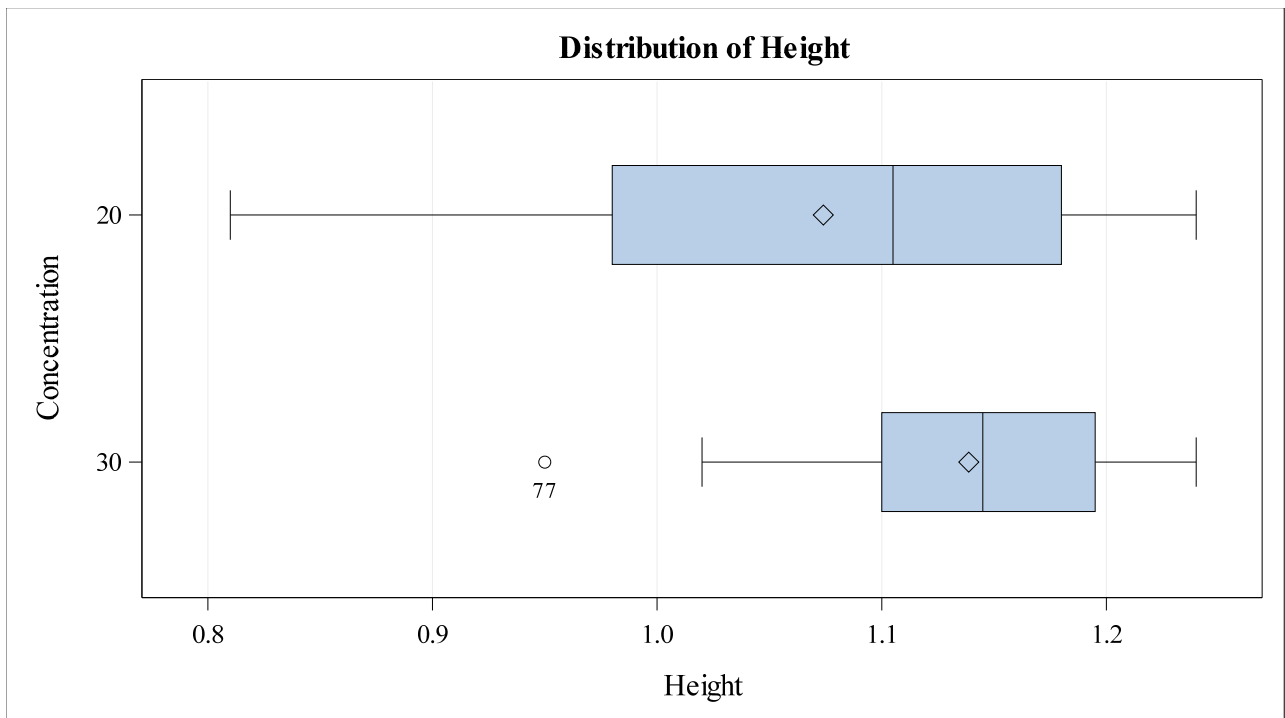

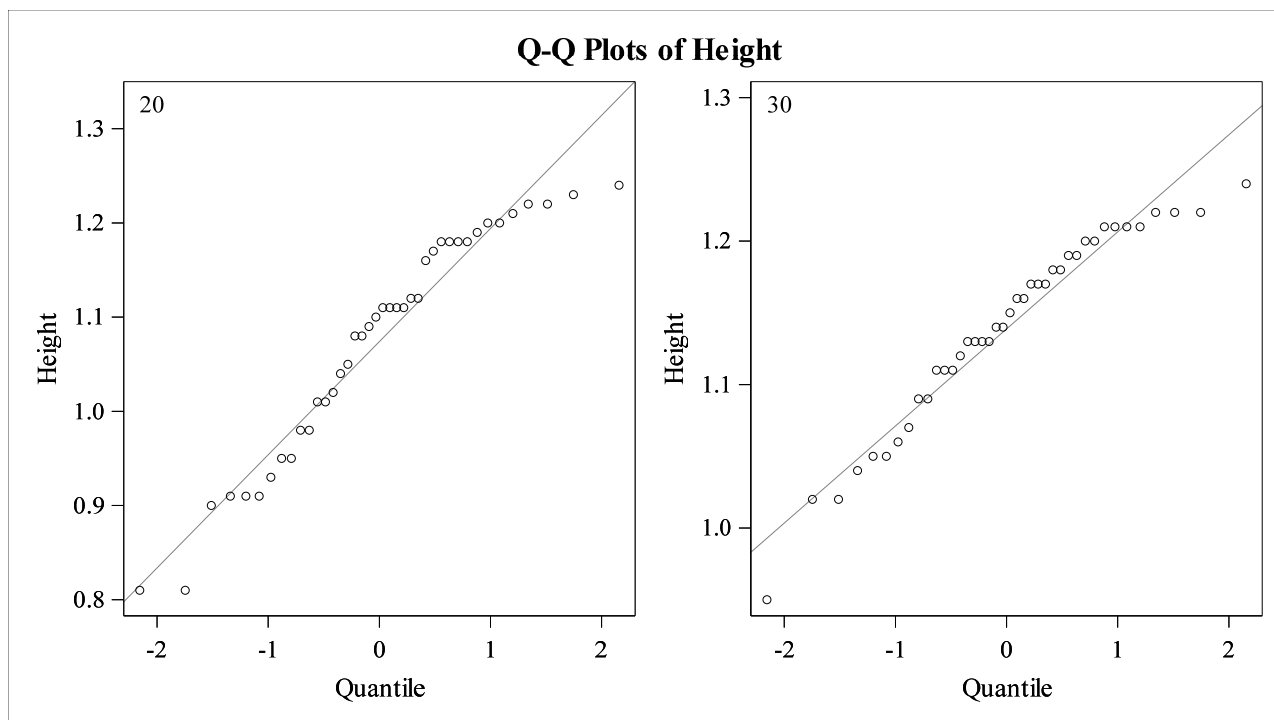

***Biomechanical evaluation***  
***Test between collagen concentration***

**Concentration=20**

| Class Level Information |        |           |
|-------------------------|--------|-----------|
| Class                   | Levels | Values    |
| Day                     | 5      | 0 1 3 5 7 |

|                             |    |
|-----------------------------|----|
| Number of Observations Read | 40 |
| Number of Observations Used | 40 |

***Dependent Variable: Area***

**Concentration=20**

| Source          | DF | Sum of Squares | Mean Square | F Value | Pr > F |
|-----------------|----|----------------|-------------|---------|--------|
| Model           | 4  | 65492.61153    | 16373.15288 | 29.22   | <.0001 |
| Error           | 35 | 19614.80616    | 560.42303   |         |        |
| Corrected Total | 39 | 85107.41770    |             |         |        |

| R-Square | Coeff Var | Root MSE | Area Mean |
|----------|-----------|----------|-----------|
| 0.769529 | 20.11497  | 23.67326 | 117.6898  |



| Source | DF | Anova SS    | Mean Square | F Value | Pr > F |
|--------|----|-------------|-------------|---------|--------|
| Day    | 4  | 65492.61153 | 16373.15288 | 29.22   | <.0001 |

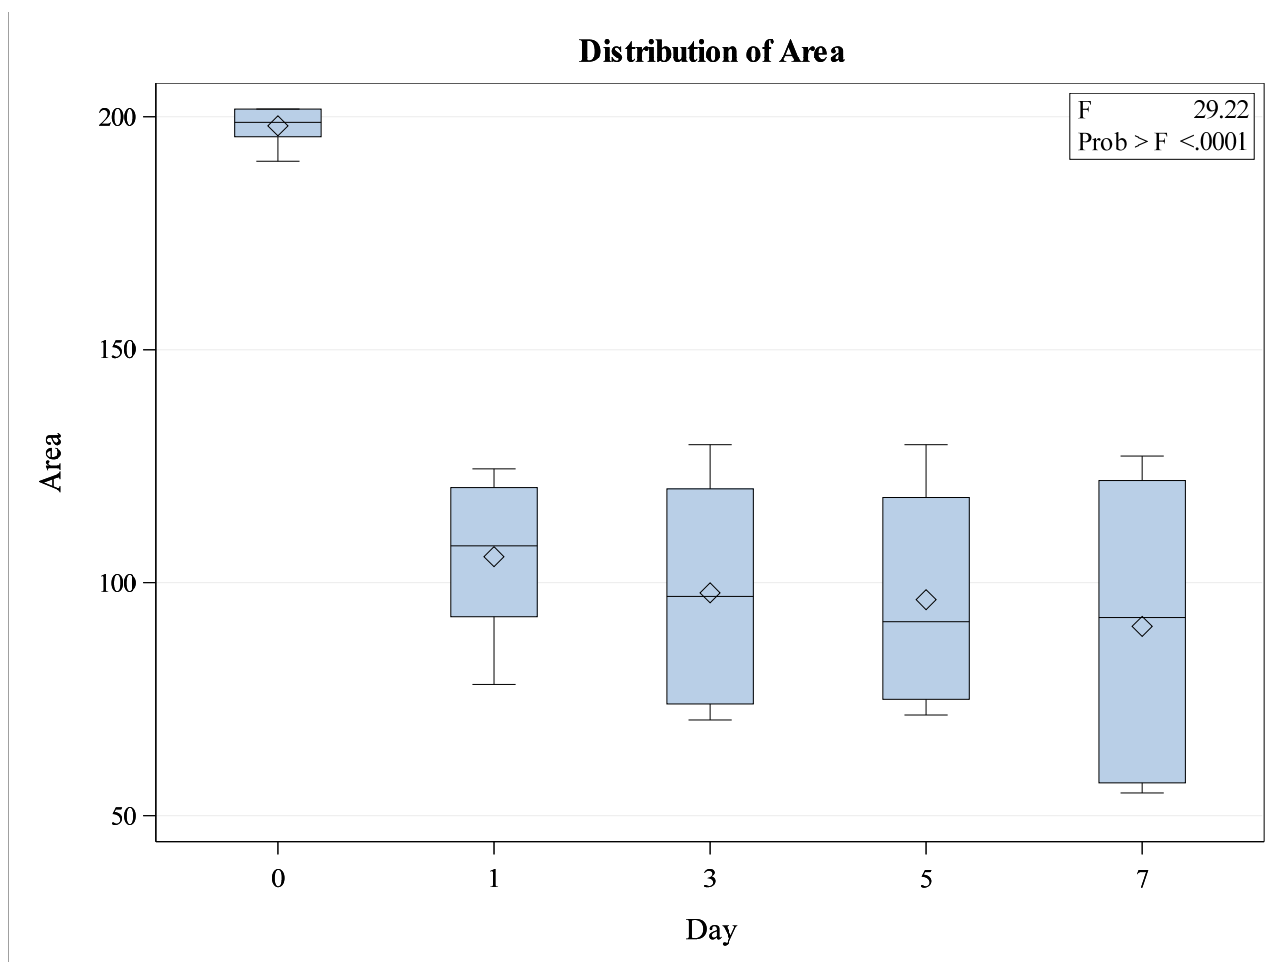

**Concentration=30**

| Class Level Information |        |           |
|-------------------------|--------|-----------|
| Class                   | Levels | Values    |
| Day                     | 5      | 0 1 3 5 7 |

|                             |    |
|-----------------------------|----|
| Number of Observations Read | 40 |
| Number of Observations Used | 40 |

***Dependent Variable: Area***

**Concentration=30**

| Source          | DF | Sum of Squares | Mean Square | F Value | Pr > F |
|-----------------|----|----------------|-------------|---------|--------|
| Model           | 4  | 8771.99462     | 2192.99866  | 6.59    | 0.0005 |
| Error           | 35 | 11642.17938    | 332.63370   |         |        |
| Corrected Total | 39 | 20414.17400    |             |         |        |

| R-Square | Coeff Var | Root MSE | Area Mean |
|----------|-----------|----------|-----------|
| 0.429701 | 10.43169  | 18.23825 | 174.8350  |

| Source | DF | Anova SS    | Mean Square | F Value | Pr > F |
|--------|----|-------------|-------------|---------|--------|
| Day    | 4  | 8771.994625 | 2192.998656 | 6.59    | 0.0005 |

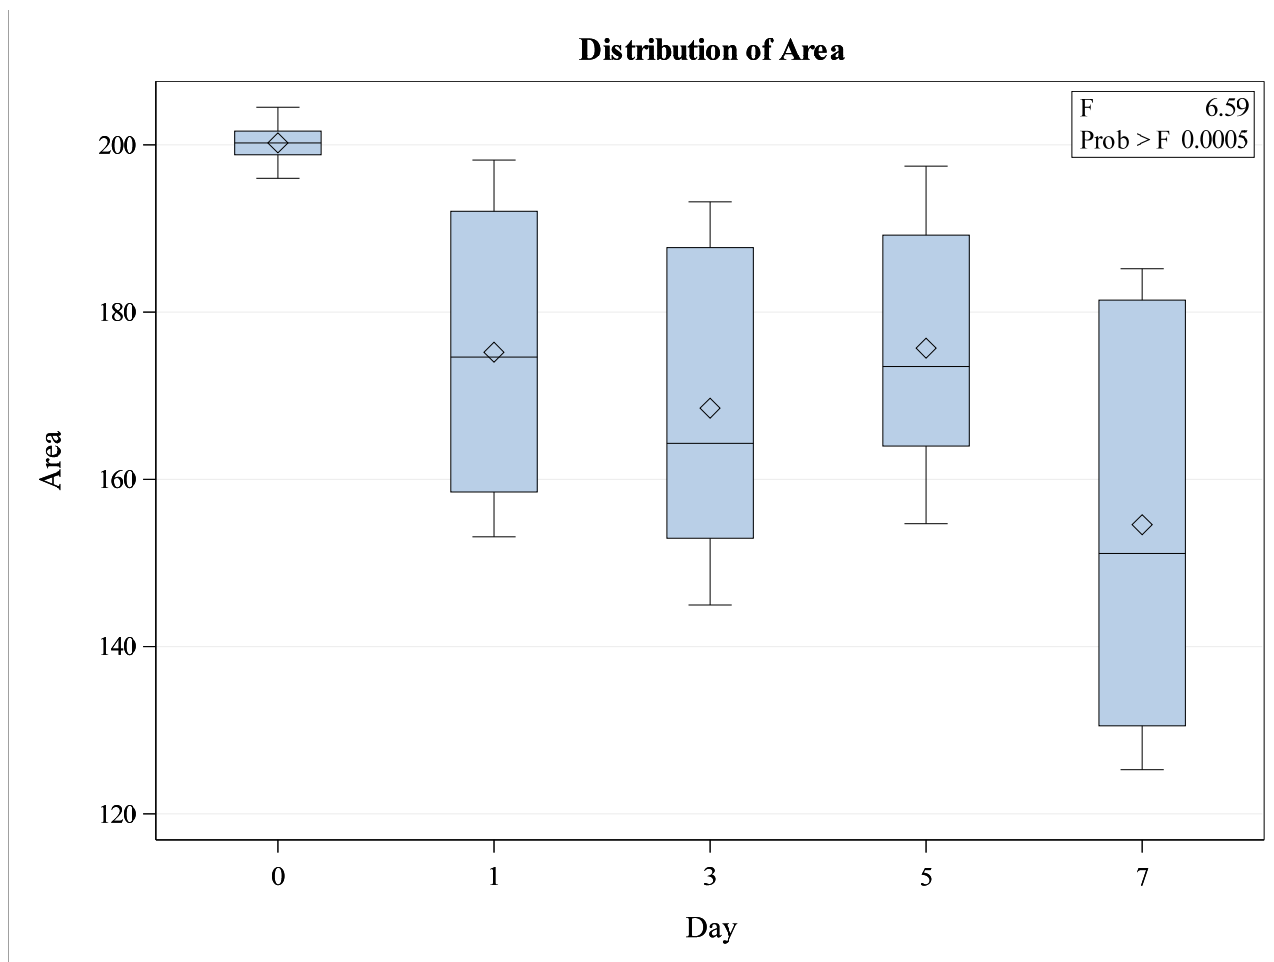

***Biomechanical evaluation***  
***Test between collagen concentration***

Concentration=20

| Class Level Information |        |           |
|-------------------------|--------|-----------|
| Class                   | Levels | Values    |
| Day                     | 5      | 0 1 3 5 7 |

|                             |    |
|-----------------------------|----|
| Number of Observations Read | 40 |
| Number of Observations Used | 40 |

**Dependent Variable: Height**

**Concentration=20**

| Source                 | DF | Sum of Squares | Mean Square | F Value | Pr > F |
|------------------------|----|----------------|-------------|---------|--------|
| <b>Model</b>           | 4  | 0.29971000     | 0.07492750  | 9.98    | <.0001 |
| <b>Error</b>           | 35 | 0.26285000     | 0.00751000  |         |        |
| <b>Corrected Total</b> | 39 | 0.56256000     |             |         |        |

| R-Square | Coeff Var | Root MSE | Height Mean |
|----------|-----------|----------|-------------|
| 0.532761 | 8.068925  | 0.086660 | 1.074000    |

| Source     | DF | Anova SS   | Mean Square | F Value | Pr > F |
|------------|----|------------|-------------|---------|--------|
| <b>Day</b> | 4  | 0.29971000 | 0.07492750  | 9.98    | <.0001 |

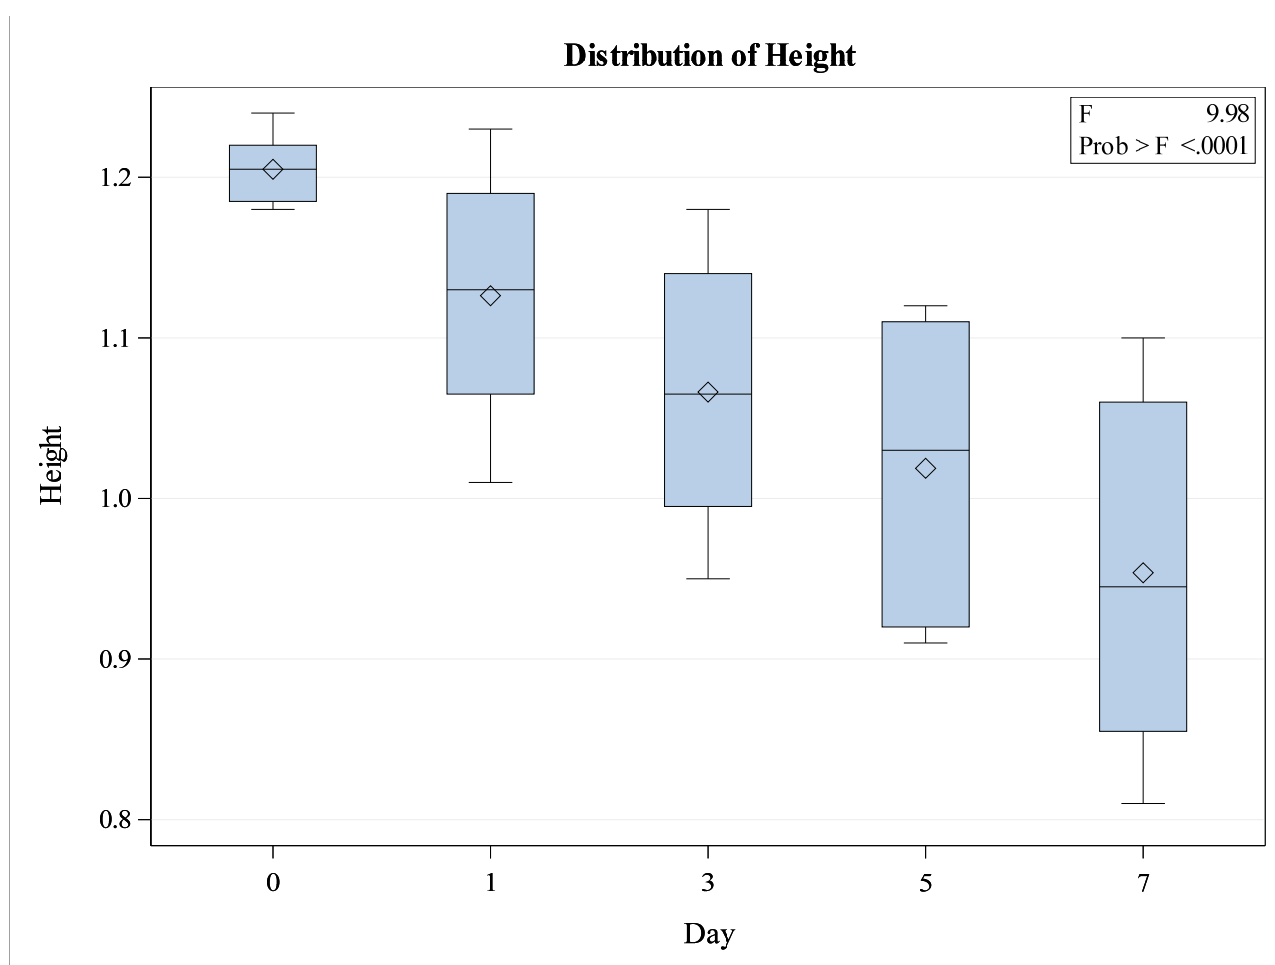

**Concentration=30**

| Class Level Information |        |           |
|-------------------------|--------|-----------|
| Class                   | Levels | Values    |
| Day                     | 5      | 0 1 3 5 7 |

|                             |    |
|-----------------------------|----|
| Number of Observations Read | 40 |
| Number of Observations Used | 40 |

***Dependent Variable: Height***

**Concentration=30**

| Source                 | DF | Sum of Squares | Mean Square | F Value | Pr > F |
|------------------------|----|----------------|-------------|---------|--------|
| <b>Model</b>           | 4  | 0.12520000     | 0.03130000  | 20.50   | <.0001 |
| <b>Error</b>           | 35 | 0.05343750     | 0.00152679  |         |        |
| <b>Corrected Total</b> | 39 | 0.17863750     |             |         |        |

| R-Square | Coeff Var | Root MSE | Height Mean |
|----------|-----------|----------|-------------|
| 0.700861 | 3.431316  | 0.039074 | 1.138750    |

| Source     | DF | Anova SS   | Mean Square | F Value | Pr > F |
|------------|----|------------|-------------|---------|--------|
| <b>Day</b> | 4  | 0.12520000 | 0.03130000  | 20.50   | <.0001 |

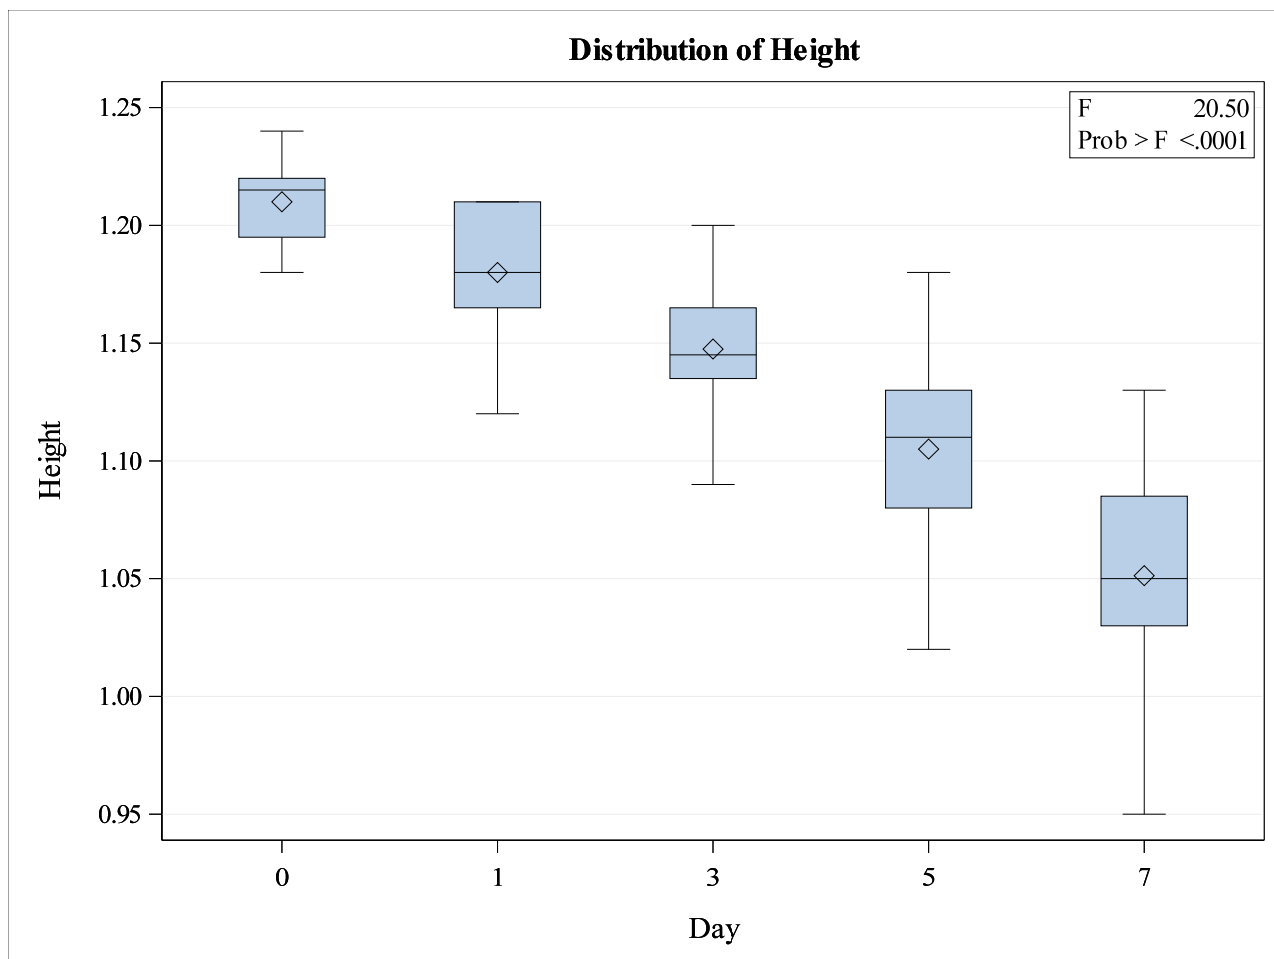

***Biomechanical evaluation***  
***Test between collagen concentration***

***Variable:***  
***Area***

**Concentration=20**

| Cultivation | Method        | N  | Mean     | Std Dev | Std Err | Minimum | Maximum |
|-------------|---------------|----|----------|---------|---------|---------|---------|
| D           |               | 20 | 99.1900  | 51.6515 | 11.5496 | 54.8700 | 201.6   |
| S           |               | 20 | 136.2    | 33.0296 | 7.3857  | 106.6   | 201.6   |
| Diff (1-2)  | Pooled        |    | -36.9995 | 43.3522 | 13.7092 |         |         |
| Diff (1-2)  | Satterthwaite |    | -36.9995 |         | 13.7092 |         |         |

| Cultivation | Method | Mean    | 95% CL Mean   | Std Dev | 95% CL Std Dev  |
|-------------|--------|---------|---------------|---------|-----------------|
| D           |        | 99.1900 | 75.0164 123.4 | 51.6515 | 39.2804 75.4407 |
| S           |        | 136.2   | 120.7 151.6   | 33.0296 | 25.1187 48.2422 |

| Cultivation | Method        | Mean     | 95% CL Mean |         | Std Dev | 95% CL Std Dev |         |
|-------------|---------------|----------|-------------|---------|---------|----------------|---------|
| Diff (1-2)  | Pooled        | -36.9995 | -64.7523    | -9.2467 | 43.3522 | 35.4294        | 55.8714 |
| Diff (1-2)  | Satterthwaite | -36.9995 | -64.9136    | -9.0854 |         |                |         |

| Method        | Variances | DF     | t Value | Pr >  t |
|---------------|-----------|--------|---------|---------|
| Pooled        | Equal     | 38     | -2.70   | 0.0103  |
| Satterthwaite | Unequal   | 32.313 | -2.70   | 0.0110  |

| Equality of Variances |        |        |         |        |
|-----------------------|--------|--------|---------|--------|
| Method                | Num DF | Den DF | F Value | Pr > F |
| Folded F              | 19     | 19     | 2.45    | 0.0583 |

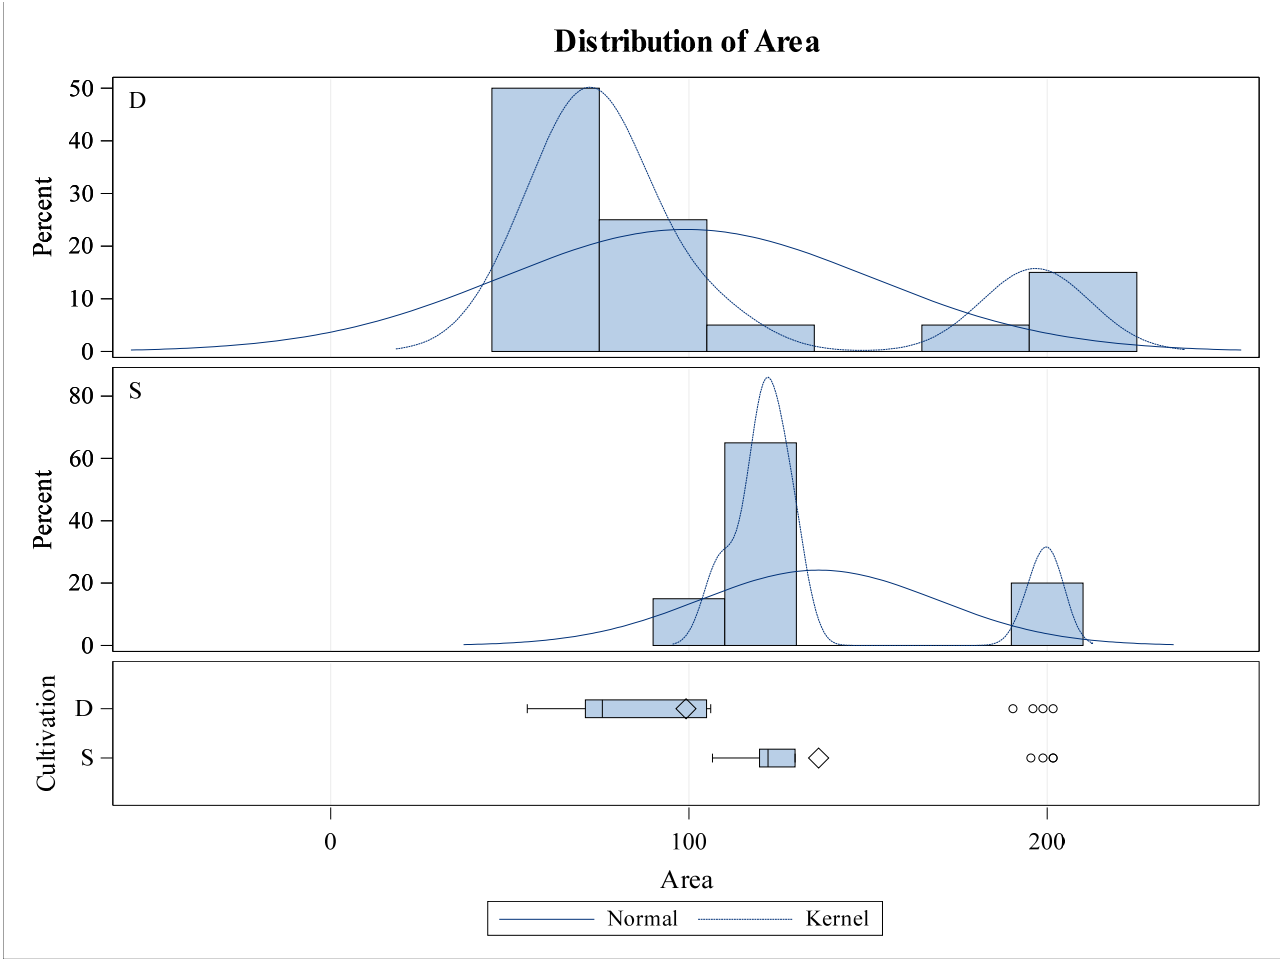

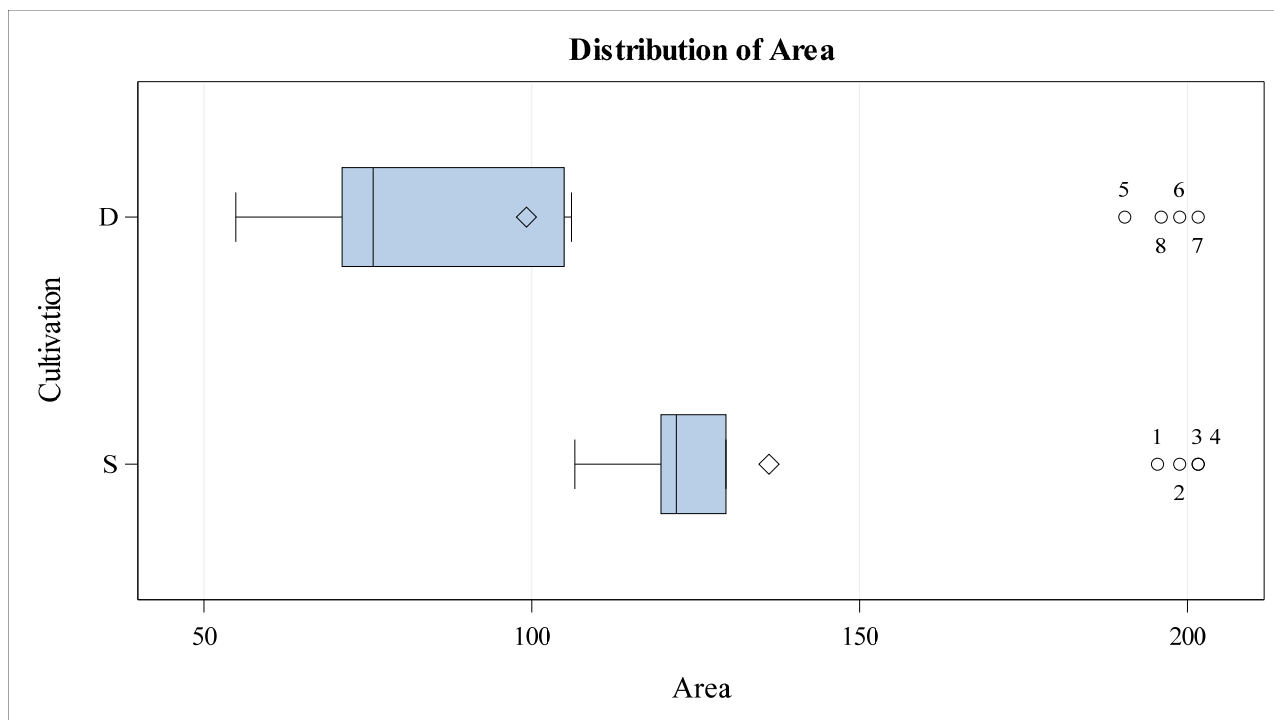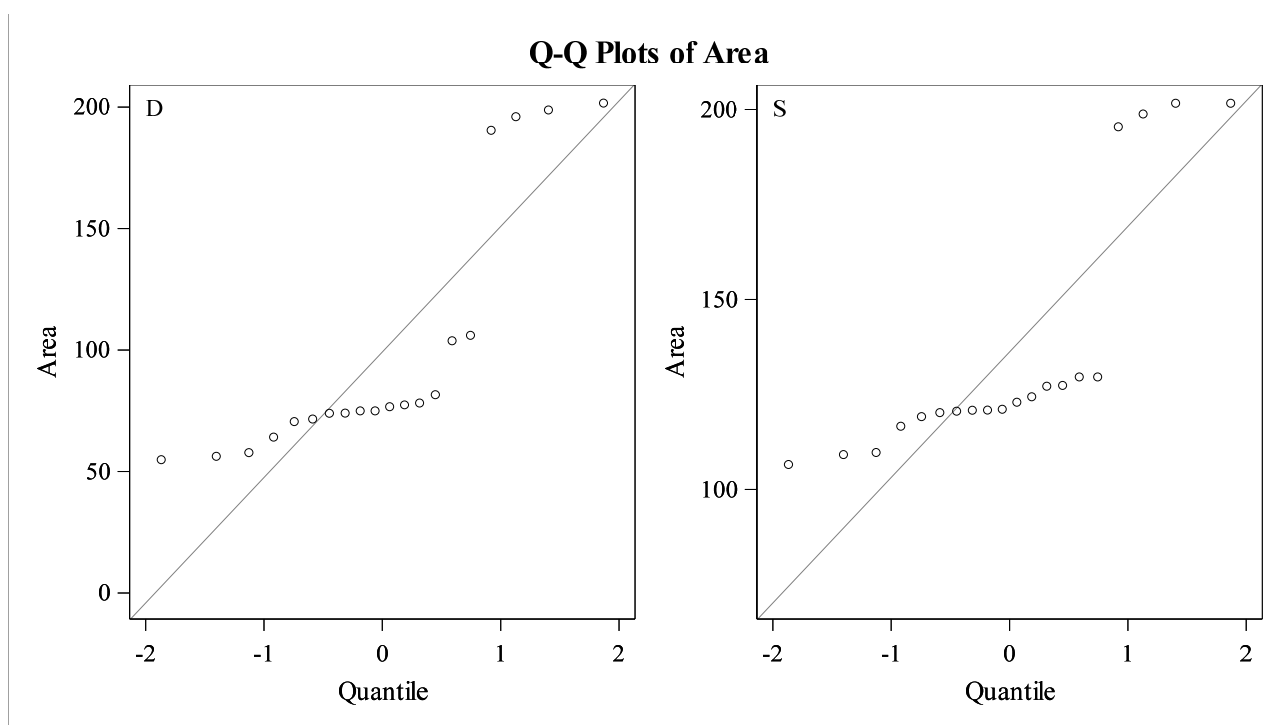

**Variable:**  
**Area**

**Concentration=30**

| Cultivation | Method | N  | Mean     | Std Dev | Std Err | Minimum | Maximum |
|-------------|--------|----|----------|---------|---------|---------|---------|
| D           |        | 20 | 160.4    | 23.2004 | 5.1878  | 125.3   | 201.6   |
| S           |        | 20 | 189.3    | 9.8511  | 2.2028  | 168.4   | 204.5   |
| Diff (1-2)  | Pooled |    | -28.8850 | 17.8228 | 5.6361  |         |         |

| Cultivation | Method        | N | Mean     | Std Dev | Std Err | Minimum | Maximum |
|-------------|---------------|---|----------|---------|---------|---------|---------|
| Diff (1-2)  | Satterthwaite |   | -28.8850 |         | 5.6361  |         |         |

| Cultivation | Method        | Mean     | 95% CL Mean |          | Std Dev | 95% CL Std Dev |         |
|-------------|---------------|----------|-------------|----------|---------|----------------|---------|
| D           |               | 160.4    | 149.5       | 171.3    | 23.2004 | 17.6437        | 33.8858 |
| S           |               | 189.3    | 184.7       | 193.9    | 9.8511  | 7.4917         | 14.3882 |
| Diff (1-2)  | Pooled        | -28.8850 | -40.2946    | -17.4754 | 17.8228 | 14.5656        | 22.9696 |
| Diff (1-2)  | Satterthwaite | -28.8850 | -40.4781    | -17.2919 |         |                |         |

| Method        | Variances | DF     | t Value | Pr >  t |
|---------------|-----------|--------|---------|---------|
| Pooled        | Equal     | 38     | -5.13   | <.0001  |
| Satterthwaite | Unequal   | 25.635 | -5.13   | <.0001  |

| Equality of Variances |        |        |         |        |
|-----------------------|--------|--------|---------|--------|
| Method                | Num DF | Den DF | F Value | Pr > F |
| Folded F              | 19     | 19     | 5.55    | 0.0005 |

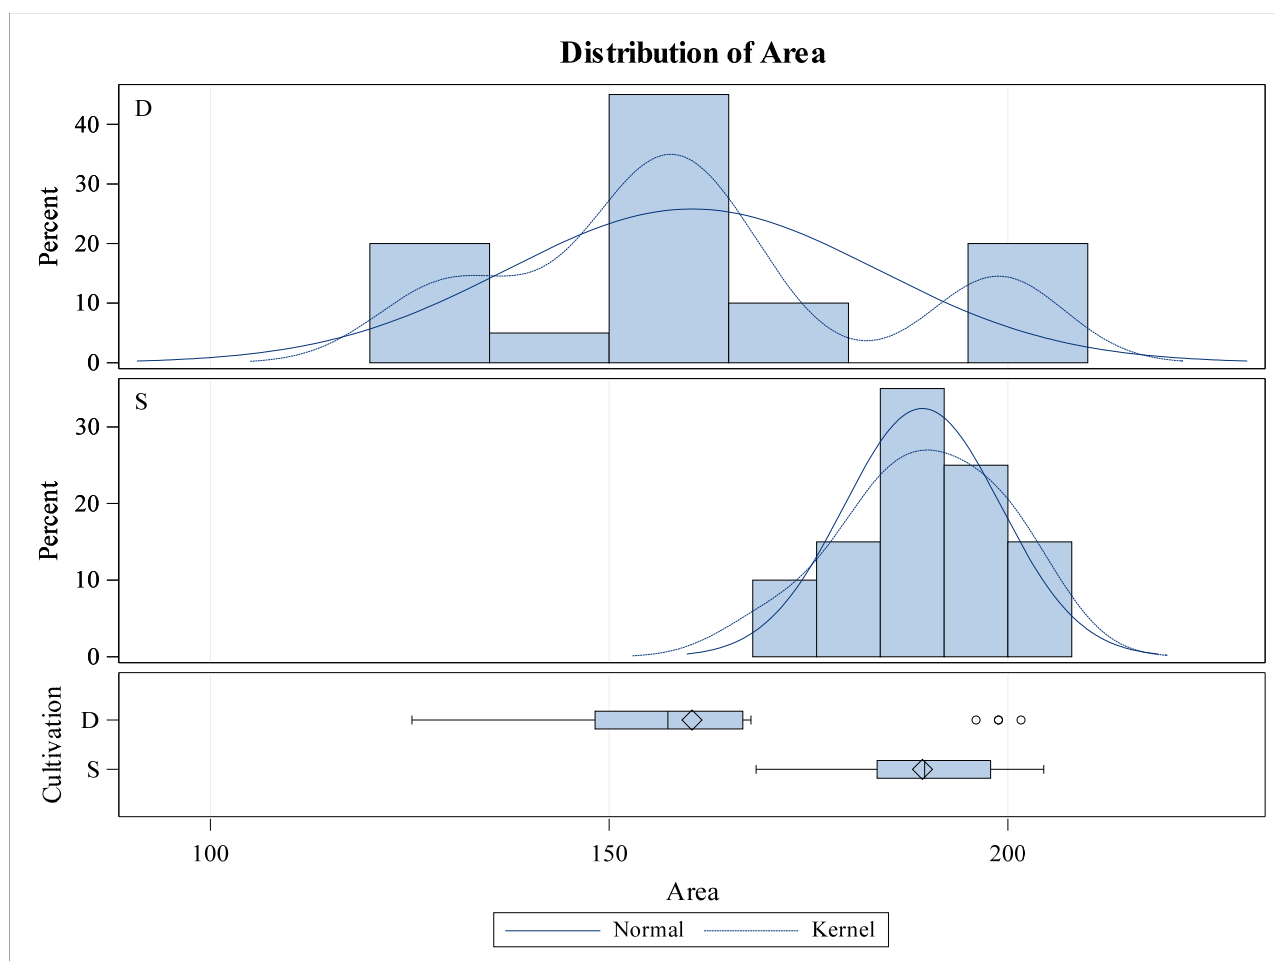



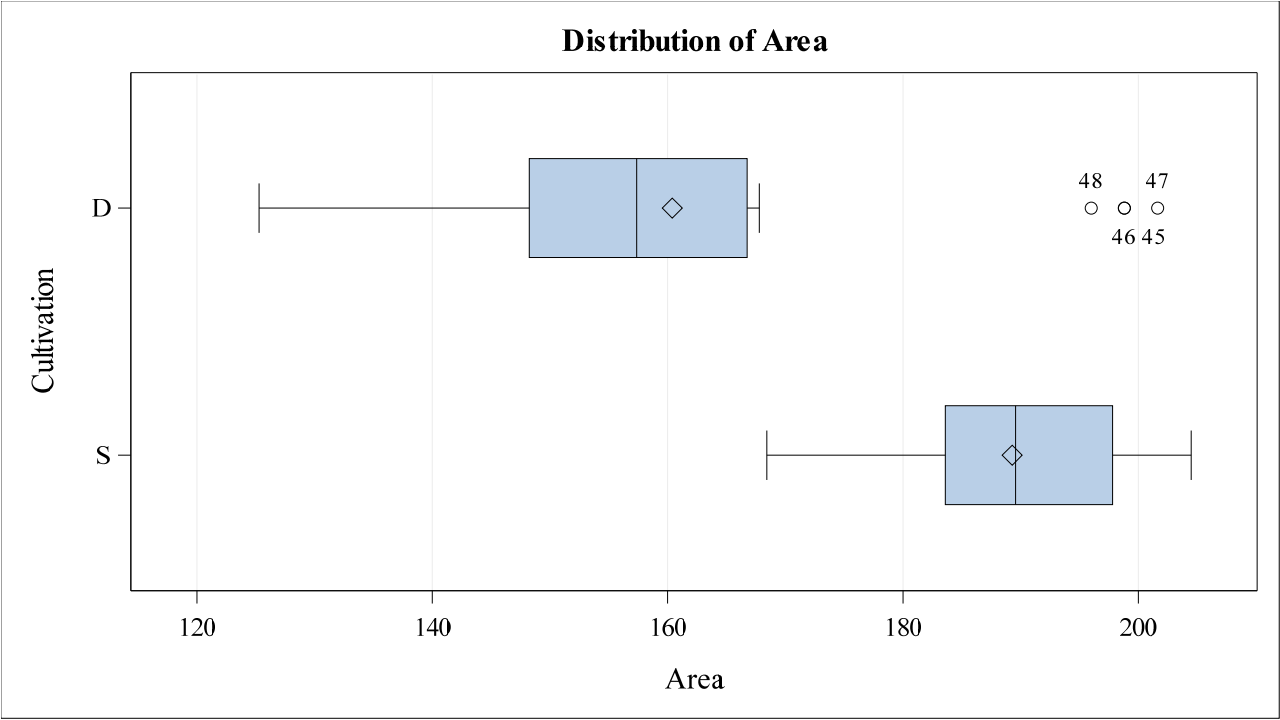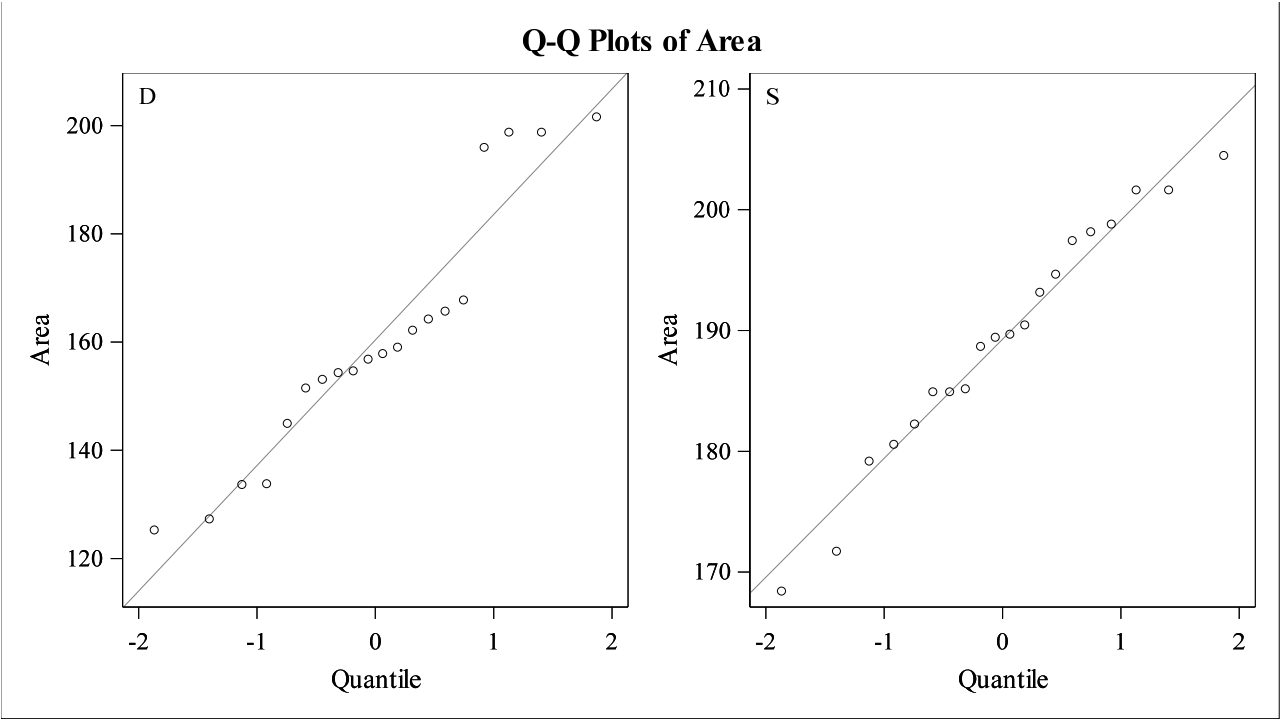

***Biomechanical evaluation***  
***Test between collagen concentration***

***Variable:***  
***Height***

**Concentration=20**

| Cultivation | Method        | N  | Mean    | Std Dev | Std Err | Minimum | Maximum |
|-------------|---------------|----|---------|---------|---------|---------|---------|
| D           |               | 20 | 1.0085  | 0.1288  | 0.0288  | 0.8100  | 1.2400  |
| S           |               | 20 | 1.1395  | 0.0632  | 0.0141  | 0.9800  | 1.2300  |
| Diff (1-2)  | Pooled        |    | -0.1310 | 0.1014  | 0.0321  |         |         |
| Diff (1-2)  | Satterthwaite |    | -0.1310 |         | 0.0321  |         |         |

| Cultivation | Method        | Mean    | 95% CL Mean |         | Std Dev | 95% CL Std Dev |        |
|-------------|---------------|---------|-------------|---------|---------|----------------|--------|
| D           |               | 1.0085  | 0.9482      | 1.0688  | 0.1288  | 0.0979         | 0.1881 |
| S           |               | 1.1395  | 1.1099      | 1.1691  | 0.0632  | 0.0481         | 0.0923 |
| Diff (1-2)  | Pooled        | -0.1310 | -0.1959     | -0.0661 | 0.1014  | 0.0829         | 0.1307 |
| Diff (1-2)  | Satterthwaite | -0.1310 | -0.1967     | -0.0653 |         |                |        |

| Method        | Variances | DF     | t Value | Pr >  t |
|---------------|-----------|--------|---------|---------|
| Pooled        | Equal     | 38     | -4.08   | 0.0002  |
| Satterthwaite | Unequal   | 27.652 | -4.08   | 0.0003  |

| Equality of Variances |        |        |         |        |
|-----------------------|--------|--------|---------|--------|
| Method                | Num DF | Den DF | F Value | Pr > F |
| Folded F              | 19     | 19     | 4.15    | 0.0032 |

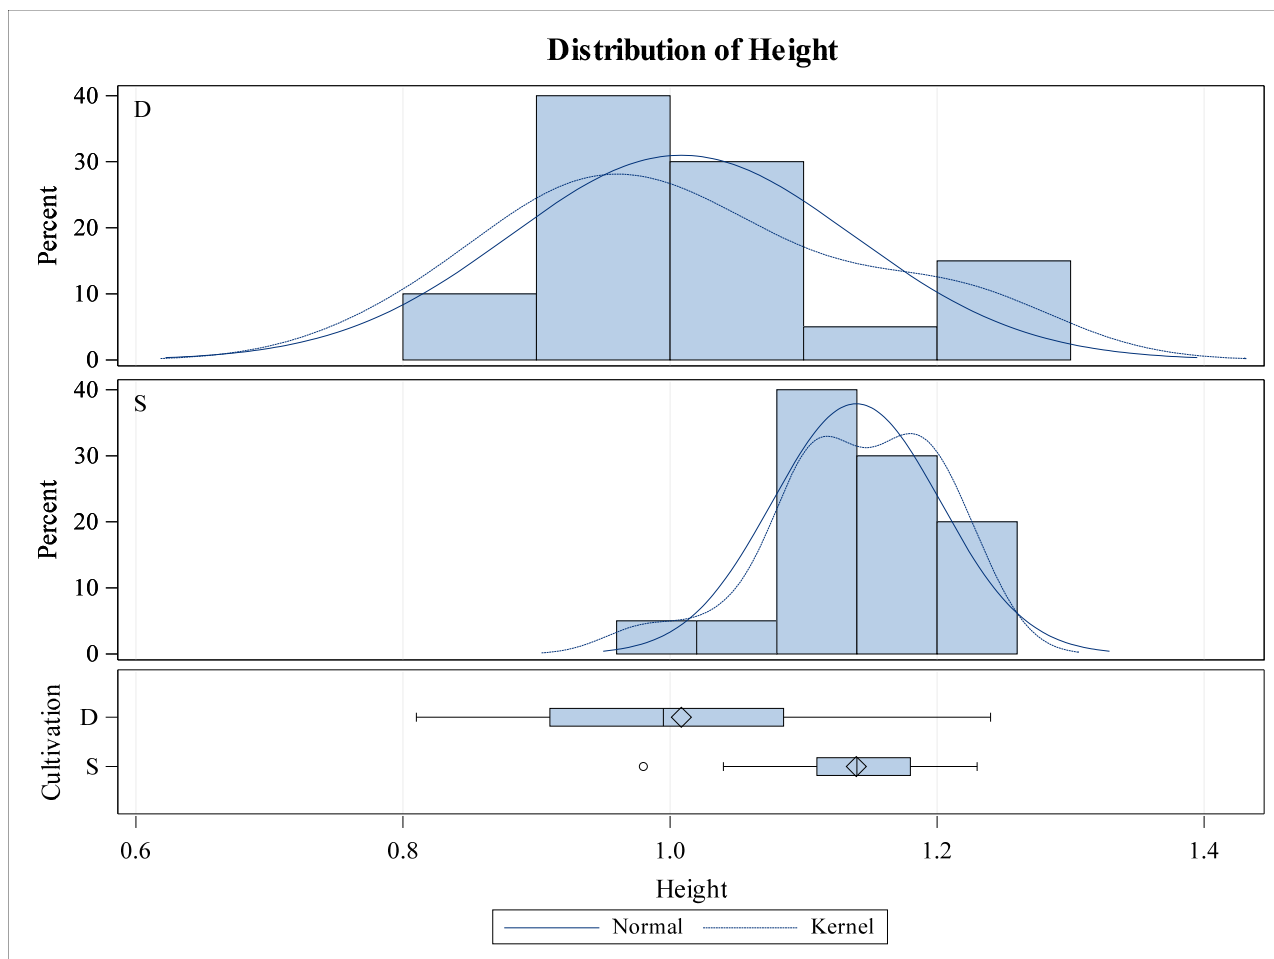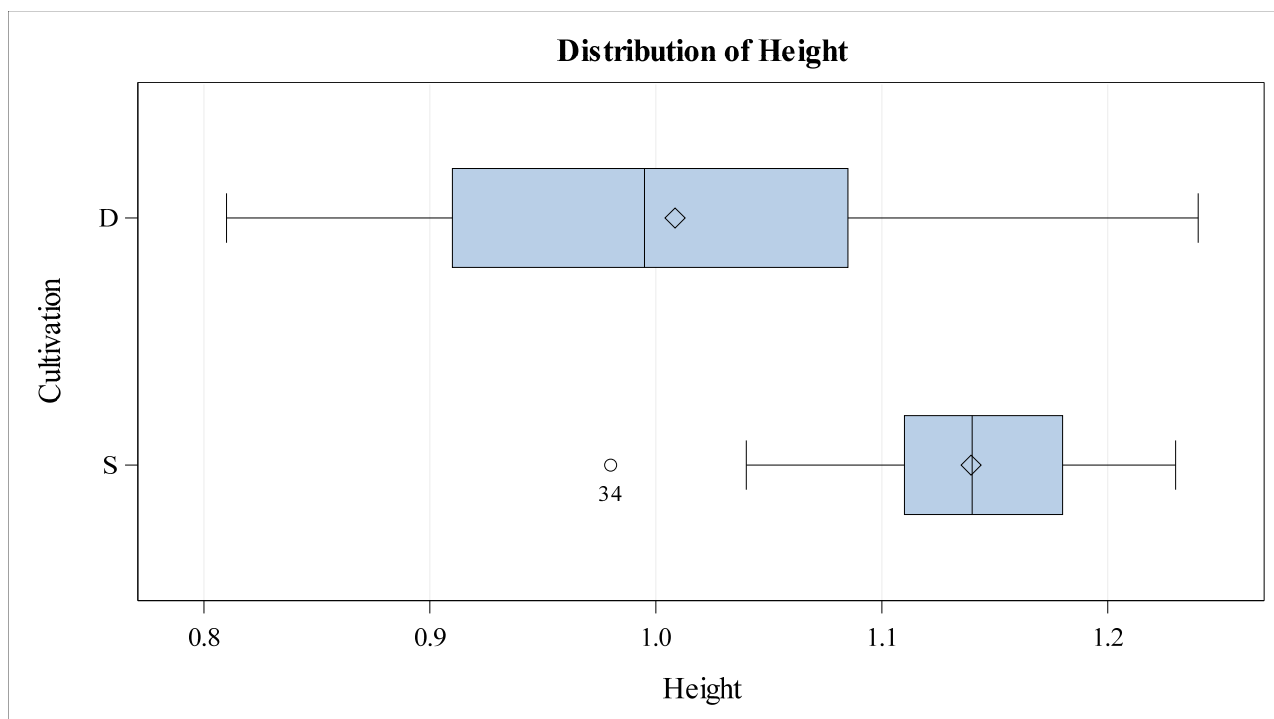

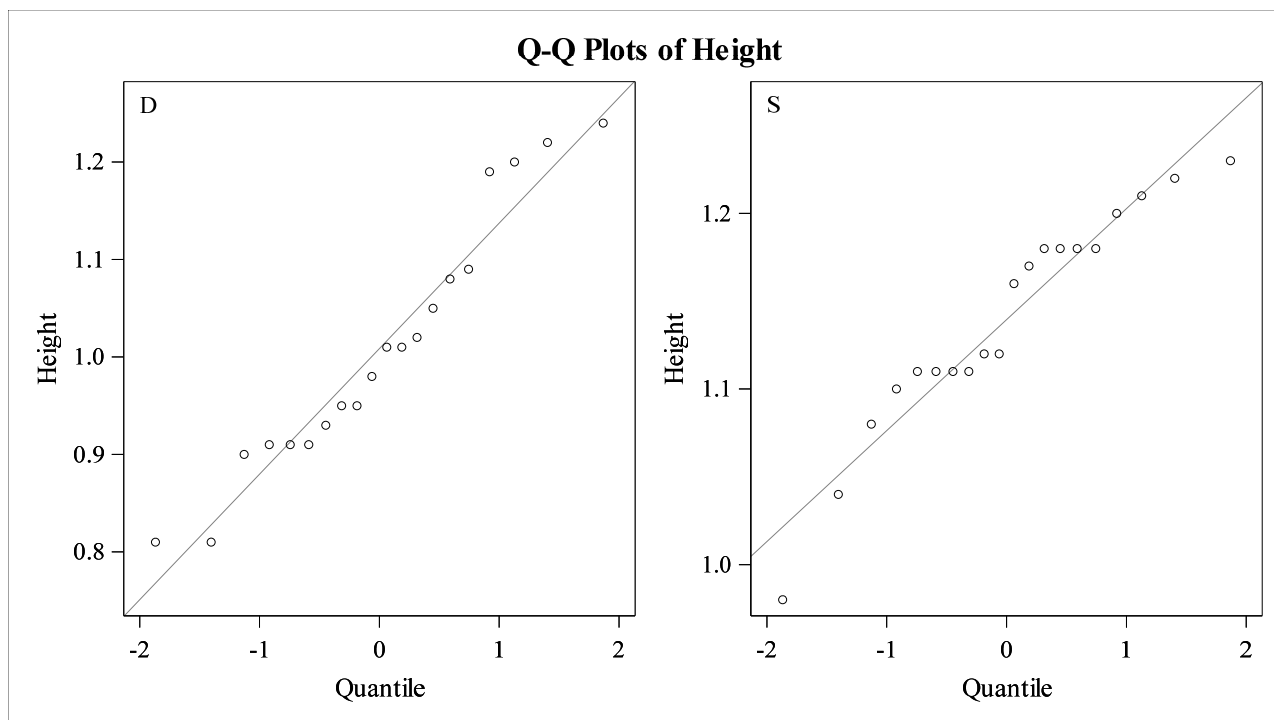

*Variable:*  
*Height*

**Concentration=30**

| Cultivation | Method        | N  | Mean    | Std Dev | Std Err | Minimum | Maximum |
|-------------|---------------|----|---------|---------|---------|---------|---------|
| D           |               | 20 | 1.1250  | 0.0769  | 0.0172  | 0.9500  | 1.2400  |
| S           |               | 20 | 1.1525  | 0.0555  | 0.0124  | 1.0500  | 1.2200  |
| Diff (1-2)  | Pooled        |    | -0.0275 | 0.0671  | 0.0212  |         |         |
| Diff (1-2)  | Satterthwaite |    | -0.0275 |         | 0.0212  |         |         |

| Cultivation | Method        | Mean    | 95% CL Mean |        | Std Dev | 95% CL Std Dev |        |
|-------------|---------------|---------|-------------|--------|---------|----------------|--------|
| D           |               | 1.1250  | 1.0890      | 1.1610 | 0.0769  | 0.0585         | 0.1124 |
| S           |               | 1.1525  | 1.1265      | 1.1785 | 0.0555  | 0.0422         | 0.0811 |
| Diff (1-2)  | Pooled        | -0.0275 | -0.0705     | 0.0155 | 0.0671  | 0.0548         | 0.0865 |
| Diff (1-2)  | Satterthwaite | -0.0275 | -0.0706     | 0.0156 |         |                |        |

| Method        | Variances | DF     | t Value | Pr >  t |
|---------------|-----------|--------|---------|---------|
| Pooled        | Equal     | 38     | -1.30   | 0.2028  |
| Satterthwaite | Unequal   | 34.566 | -1.30   | 0.2035  |

| Equality of Variances |        |        |         |        |
|-----------------------|--------|--------|---------|--------|
| Method                | Num DF | Den DF | F Value | Pr > F |
| Folded F              | 19     | 19     | 1.92    | 0.1640 |

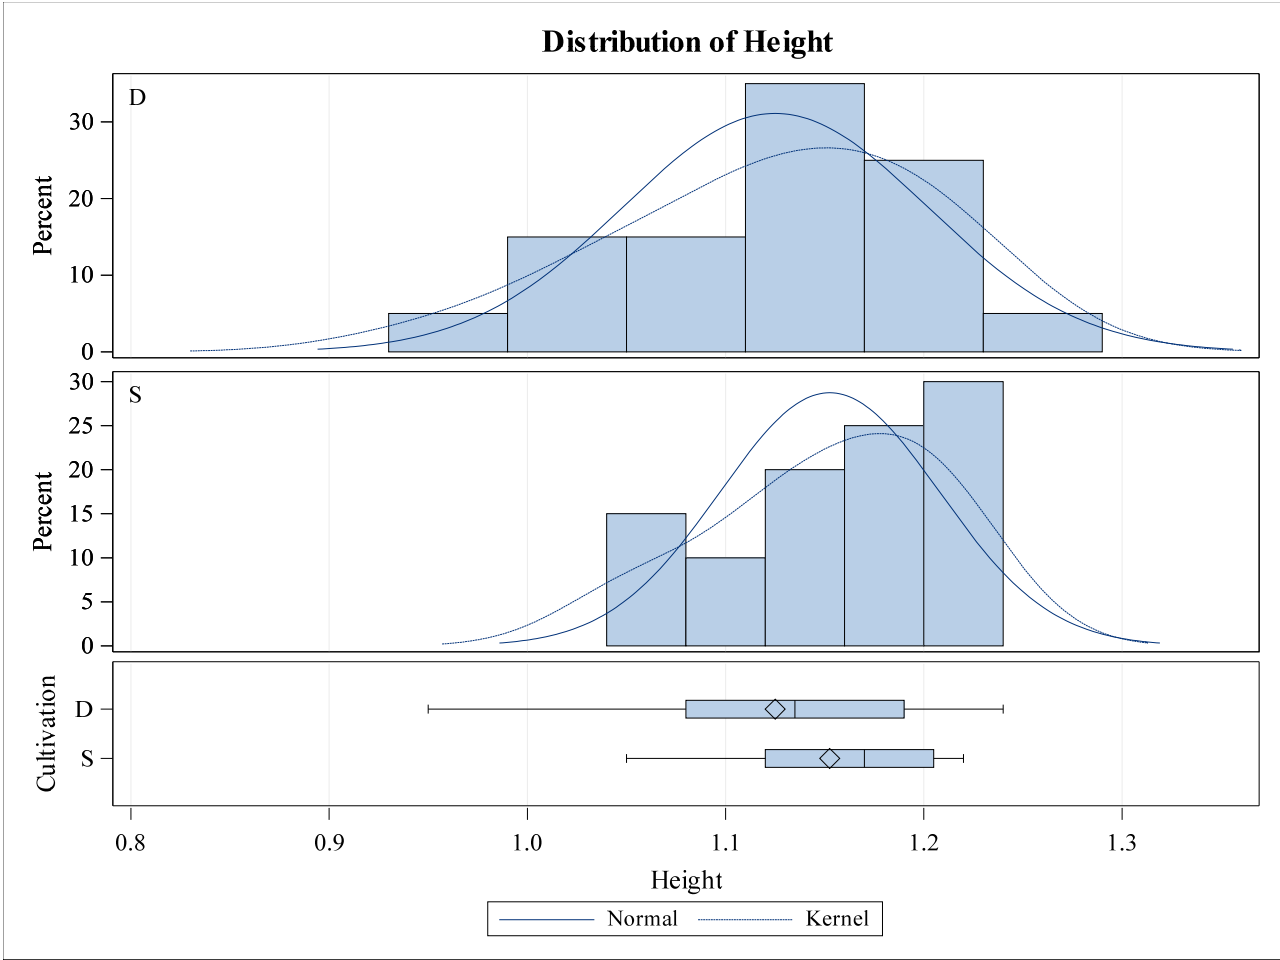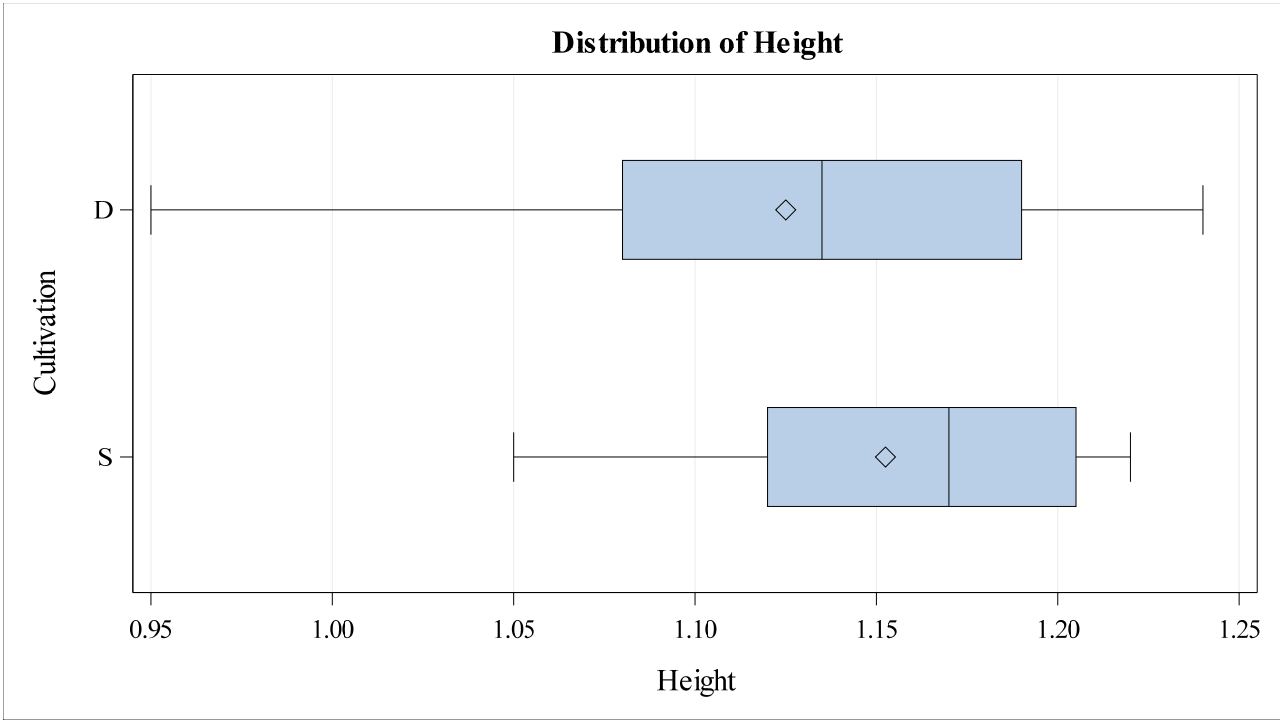

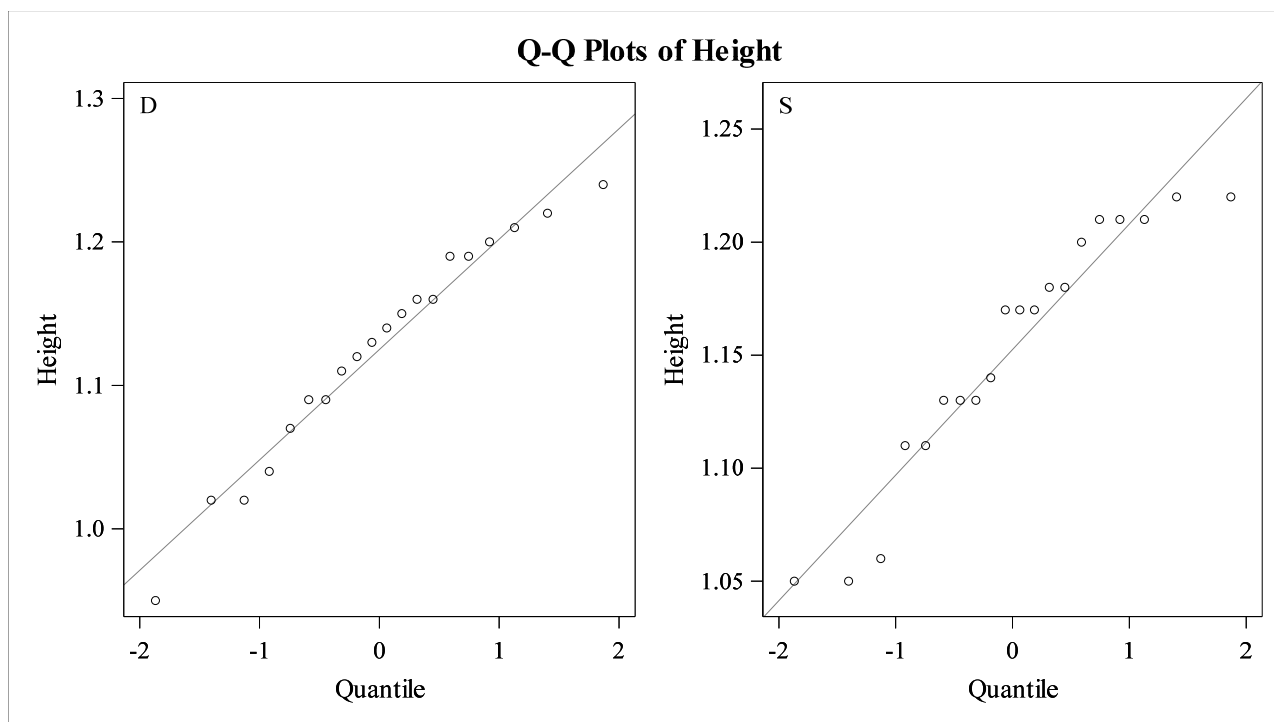

***Biomechanical evaluation***  
***Test between collagen concentration***

**Concentration=20**

| Class Level Information |        |           |
|-------------------------|--------|-----------|
| Class                   | Levels | Values    |
| Day                     | 5      | 0 1 3 5 7 |
| Cultivation             | 2      | D S       |

|                             |    |
|-----------------------------|----|
| Number of Observations Read | 40 |
| Number of Observations Used | 40 |

***Dependent Variable: Area***

**Concentration=20**

| Source          | DF | Sum of Squares | Mean Square | F Value | Pr > F |
|-----------------|----|----------------|-------------|---------|--------|
| Model           | 5  | 79182.24154    | 15836.44831 | 90.87   | <.0001 |
| Error           | 34 | 5925.17616     | 174.26989   |         |        |
| Corrected Total | 39 | 85107.41770    |             |         |        |

| R-Square | Coeff Var | Root MSE | Area Mean |
|----------|-----------|----------|-----------|
| 0.930380 | 11.21689  | 13.20113 | 117.6898  |

| Source      | DF | Anova SS    | Mean Square | F Value | Pr > F |
|-------------|----|-------------|-------------|---------|--------|
| Day         | 4  | 65492.61153 | 16373.15288 | 93.95   | <.0001 |
| Cultivation | 1  | 13689.63000 | 13689.63000 | 78.55   | <.0001 |

**Concentration=30**

| Class Level Information |        |           |
|-------------------------|--------|-----------|
| Class                   | Levels | Values    |
| Day                     | 5      | 0 1 3 5 7 |
| Cultivation             | 2      | D S       |

|                             |    |
|-----------------------------|----|
| Number of Observations Read | 40 |
| Number of Observations Used | 40 |

***Dependent Variable: Area***

**Concentration=30**

| Source          | DF | Sum of Squares | Mean Square | F Value | Pr > F |
|-----------------|----|----------------|-------------|---------|--------|
| Model           | 5  | 17115.42687    | 3423.08537  | 35.28   | <.0001 |
| Error           | 34 | 3298.74713     | 97.02197    |         |        |
| Corrected Total | 39 | 20414.17400    |             |         |        |

| R-Square | Coeff Var | Root MSE | Area Mean |
|----------|-----------|----------|-----------|
| 0.838409 | 5.633868  | 9.849973 | 174.8350  |

| Source      | DF | Anova SS    | Mean Square | F Value | Pr > F |
|-------------|----|-------------|-------------|---------|--------|
| Day         | 4  | 8771.994625 | 2192.998656 | 22.60   | <.0001 |
| Cultivation | 1  | 8343.432250 | 8343.432250 | 86.00   | <.0001 |

***Biomechanical evaluation***  
***Test between collagen concentration***

***Model: MODEL1***

***Dependent Variable: Area***

Concentration=20

|                             |    |
|-----------------------------|----|
| Number of Observations Read | 40 |
| Number of Observations Used | 40 |

*Stepwise Selection: Step 1*

*Variable Day Entered: R-Square = 0.3876 and C(p) = 14.1799*

| Analysis of Variance |    |                |             |         |        |
|----------------------|----|----------------|-------------|---------|--------|
| Source               | DF | Sum of Squares | Mean Square | F Value | Pr > F |
| Model                | 1  | 32987          | 32987       | 24.05   | <.0001 |
| Error                | 38 | 52121          | 1371.59832  |         |        |
| Corrected Total      | 39 | 85107          |             |         |        |

| Variable  | Parameter Estimate | Standard Error | Type II SS | F Value | Pr > F |
|-----------|--------------------|----------------|------------|---------|--------|
| Intercept | 153.56851          | 9.37101        | 368348     | 268.55  | <.0001 |
| Day       | -11.21211          | 2.28629        | 32987      | 24.05   | <.0001 |

*Bounds on condition number: 1, 1*

*Stepwise Selection: Step 2*

*Variable cultivation\_new Entered: R-Square = 0.5484 and C(p) = 3.0000*

| Analysis of Variance |    |                |             |         |        |
|----------------------|----|----------------|-------------|---------|--------|
| Source               | DF | Sum of Squares | Mean Square | F Value | Pr > F |
| Model                | 2  | 46676          | 23338       | 22.47   | <.0001 |
| Error                | 37 | 38431          | 1038.67854  |         |        |
| Corrected Total      | 39 | 85107          |             |         |        |



| Variable        | Parameter Estimate | Standard Error | Type II SS | F Value | Pr > F |
|-----------------|--------------------|----------------|------------|---------|--------|
| Intercept       | 209.06776          | 17.32638       | 151231     | 145.60  | <.0001 |
| Day             | -11.21211          | 1.98957        | 32987      | 31.76   | <.0001 |
| cultivation_new | -36.99950          | 10.19156       | 13690      | 13.18   | 0.0009 |

*Bounds on condition number: 1, 4*

*All variables left in the model are significant at the 0.1500 level.*

*All variables have been entered into the model.*

| Summary of Stepwise Selection |                  |                  |                  |                |                  |                |         |         |        |
|-------------------------------|------------------|------------------|------------------|----------------|------------------|----------------|---------|---------|--------|
| Step                          | Variable Entered | Variable Removed | Label            | Number Vars In | Partial R-Square | Model R-Square | C(p)    | F Value | Pr > F |
| 1                             | Day              |                  |                  | 1              | 0.3876           | 0.3876         | 14.1799 | 24.05   | <.0001 |
| 2                             | cultivation_new  |                  | Cultivation type | 2              | 0.1609           | 0.5484         | 3.0000  | 13.18   | 0.0009 |

*Model: MODEL1*

*Dependent Variable: Area*

Concentration=20

## Fit Diagnostics for Area

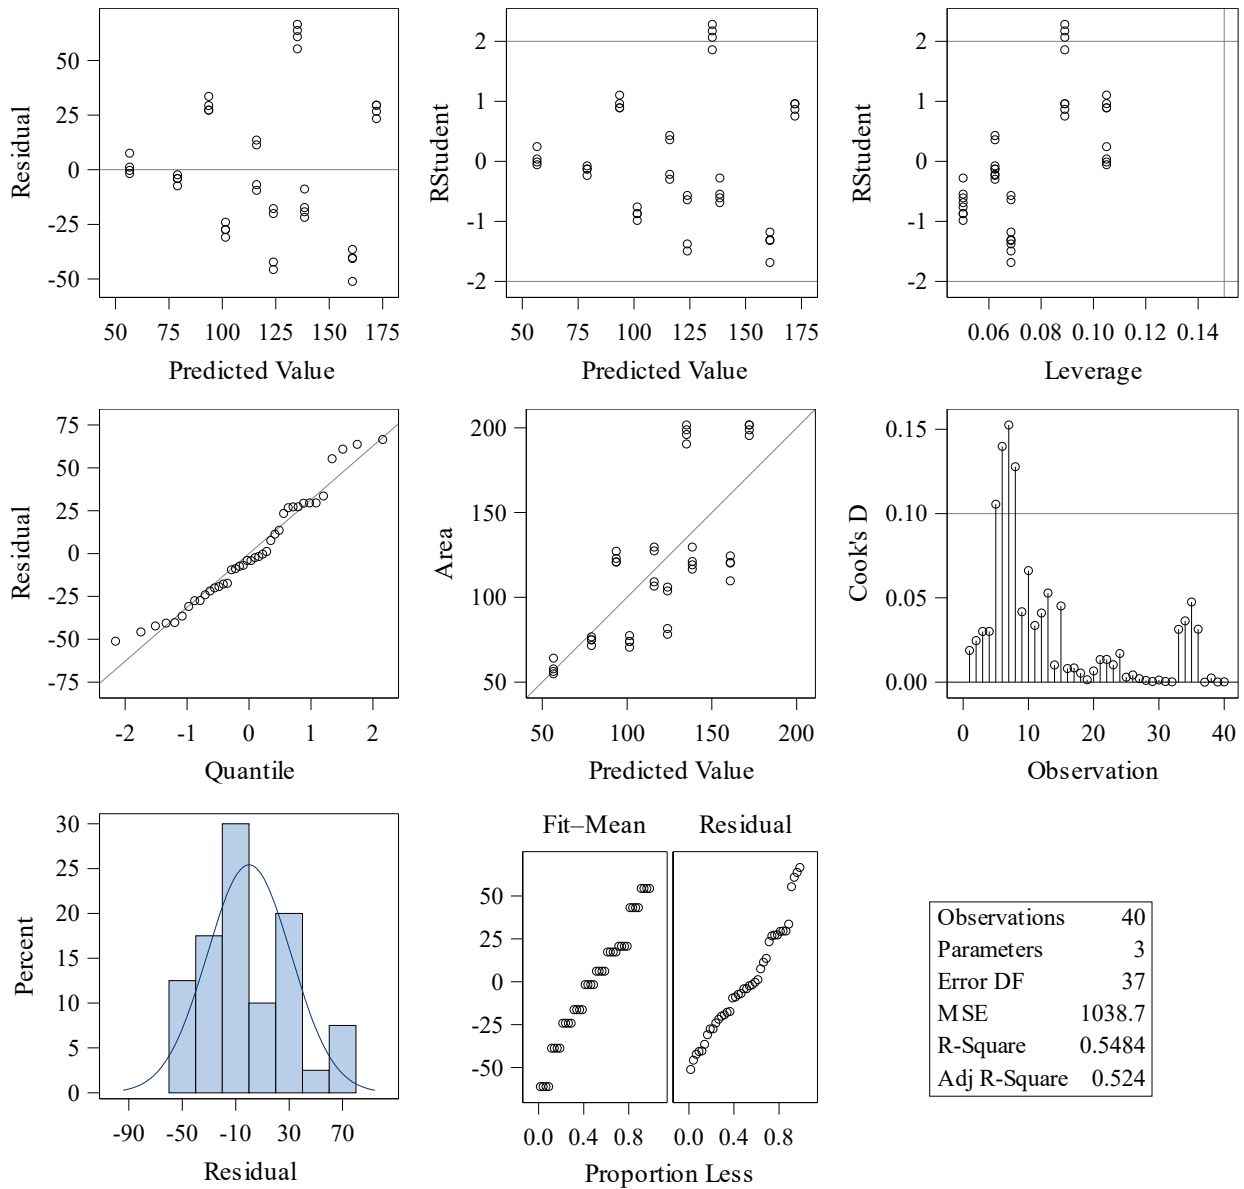

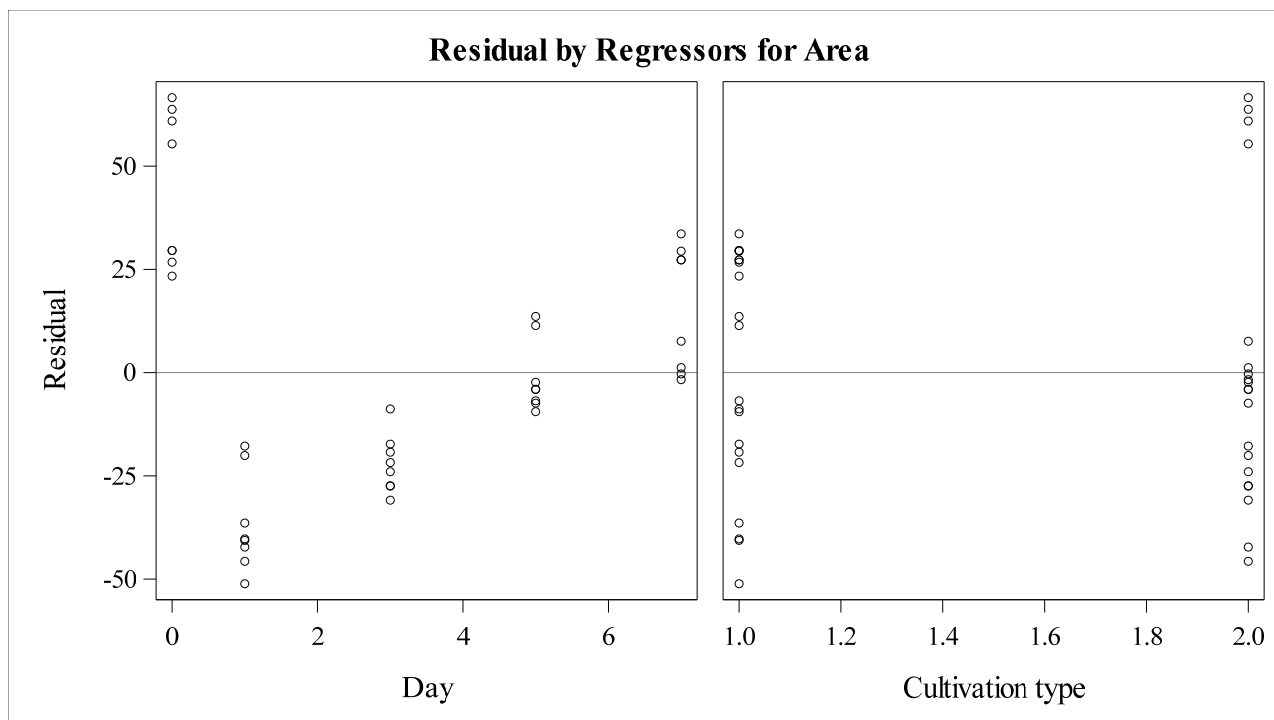

**Model: MODEL1**

**Dependent Variable: Area**

**Concentration=30**

|                             |    |
|-----------------------------|----|
| Number of Observations Read | 40 |
| Number of Observations Used | 40 |

**Stepwise Selection: Step 1**

**Variable cultivation\_new Entered: R-Square = 0.4087 and C(p) = 37.0438**

| Analysis of Variance |    |                |             |         |        |
|----------------------|----|----------------|-------------|---------|--------|
| Source               | DF | Sum of Squares | Mean Square | F Value | Pr > F |
| Model                | 1  | 8343.43225     | 8343.43225  | 26.27   | <.0001 |
| Error                | 38 | 12071          | 317.65110   |         |        |
| Corrected Total      | 39 | 20414          |             |         |        |

| Variable        | Parameter Estimate | Standard Error | Type II SS | F Value | Pr > F |
|-----------------|--------------------|----------------|------------|---------|--------|
| Intercept       | 218.16250          | 8.91138        | 190380     | 599.34  | <.0001 |
| cultivation_new | -28.88500          | 5.63605        | 8343.43225 | 26.27   | <.0001 |

***Bounds on condition number: 1, 1***

***Stepwise Selection: Step 2***

***Variable Day Entered: R-Square = 0.7005 and C(p) = 3.0000***

| Analysis of Variance |    |                |             |         |        |
|----------------------|----|----------------|-------------|---------|--------|
| Source               | DF | Sum of Squares | Mean Square | F Value | Pr > F |
| Model                | 2  | 14300          | 7149.89835  | 43.27   | <.0001 |
| Error                | 37 | 6114.37730     | 165.25344   |         |        |
| Corrected Total      | 39 | 20414          |             |         |        |

| Variable        | Parameter Estimate | Standard Error | Type II SS | F Value | Pr > F |
|-----------------|--------------------|----------------|------------|---------|--------|
| Intercept       | 233.40860          | 6.91103        | 188495     | 1140.64 | <.0001 |
| Day             | -4.76441           | 0.79358        | 5956.36445 | 36.04   | <.0001 |
| cultivation_new | -28.88500          | 4.06514        | 8343.43225 | 50.49   | <.0001 |

***Bounds on condition number: 1, 4***

***All variables left in the model are significant at the 0.1500 level.***

***All variables have been entered into the model.***

| Summary of Stepwise Selection |                  |                  |                  |                |                  |                |         |         |        |
|-------------------------------|------------------|------------------|------------------|----------------|------------------|----------------|---------|---------|--------|
| Step                          | Variable Entered | Variable Removed | Label            | Number Vars In | Partial R-Square | Model R-Square | C(p)    | F Value | Pr > F |
| 1                             | cultivation_new  |                  | Cultivation type | 1              | 0.4087           | 0.4087         | 37.0438 | 26.27   | <.0001 |
| 2                             | Day              |                  |                  | 2              | 0.2918           | 0.7005         | 3.0000  | 36.04   | <.0001 |

***Model: MODEL1***

***Dependent Variable: Area***

Concentration=30

## Fit Diagnostics for Area

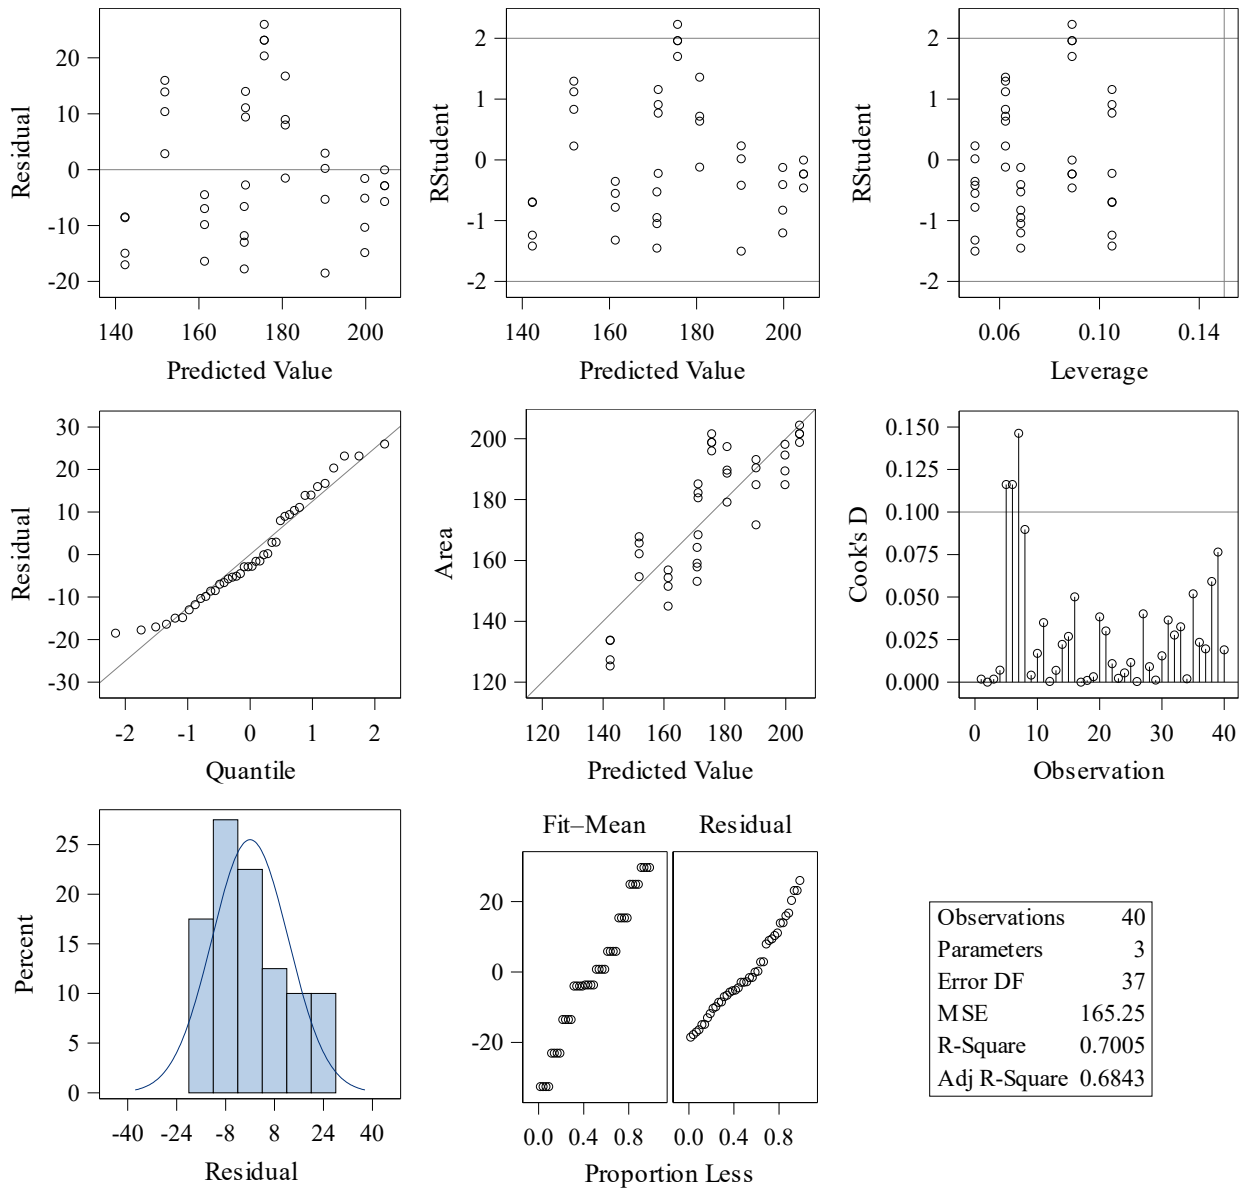

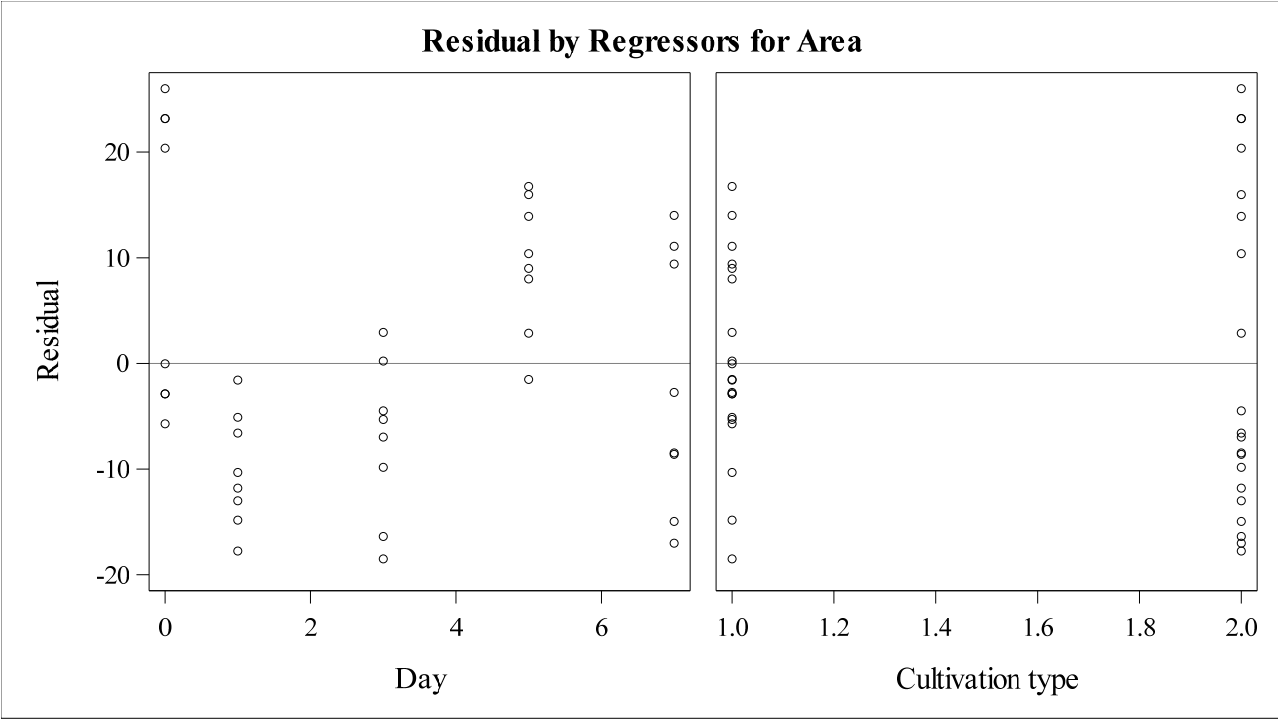

*Biomechanical evaluation*  
*Test of collagen concentration*

*Variable:*  
*Area*

| Concentration | Method        | N  | Mean     | Std Dev | Std Err | Minimum | Maximum |
|---------------|---------------|----|----------|---------|---------|---------|---------|
| 20            |               | 64 | 92.8005  | 74.4459 | 9.3057  | 9.8200  | 204.5   |
| 30            |               | 64 | 121.3    | 61.9355 | 7.7419  | 34.0300 | 208.8   |
| Diff (1-2)    | Pooled        |    | -28.4780 | 68.4770 | 12.1051 |         |         |
| Diff (1-2)    | Satterthwaite |    | -28.4780 |         | 12.1051 |         |         |

| Concentration | Method        | Mean     | 95% CL Mean |         | Std Dev | 95% CL Std Dev |         |
|---------------|---------------|----------|-------------|---------|---------|----------------|---------|
| 20            |               | 92.8005  | 74.2044     | 111.4   | 74.4459 | 63.4128        | 90.1629 |
| 30            |               | 121.3    | 105.8       | 136.7   | 61.9355 | 52.7565        | 75.0114 |
| Diff (1-2)    | Pooled        | -28.4780 | -52.4337    | -4.5223 | 68.4770 | 60.9653        | 78.1166 |
| Diff (1-2)    | Satterthwaite | -28.4780 | -52.4414    | -4.5146 |         |                |         |

| Method        | Variances | DF     | t Value | Pr >  t |
|---------------|-----------|--------|---------|---------|
| Pooled        | Equal     | 126    | -2.35   | 0.0202  |
| Satterthwaite | Unequal   | 121.96 | -2.35   | 0.0202  |

| Equality of Variances |        |        |         |        |
|-----------------------|--------|--------|---------|--------|
| Method                | Num DF | Den DF | F Value | Pr > F |
| Folded F              | 63     | 63     | 1.44    | 0.1469 |

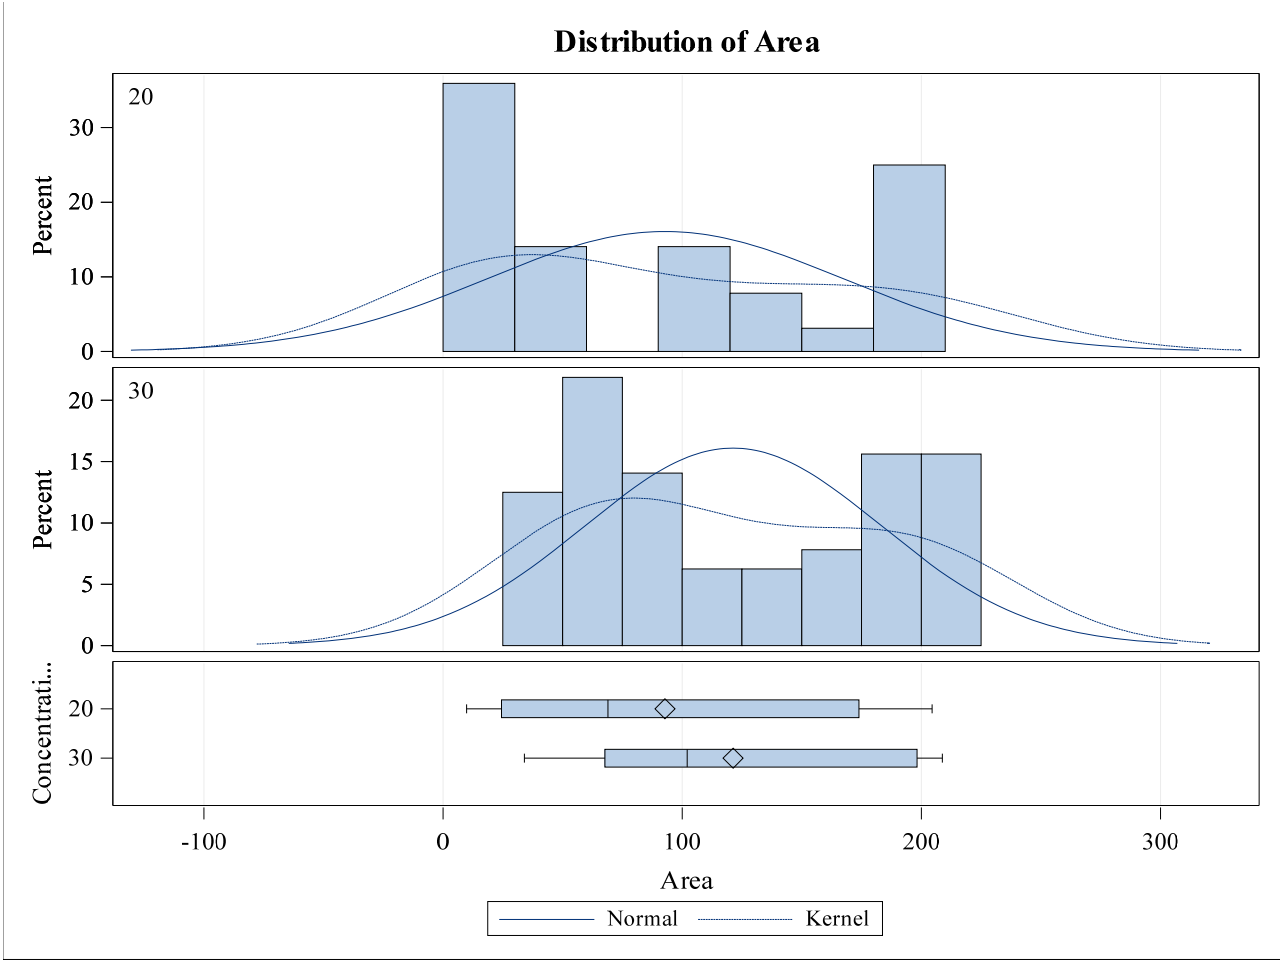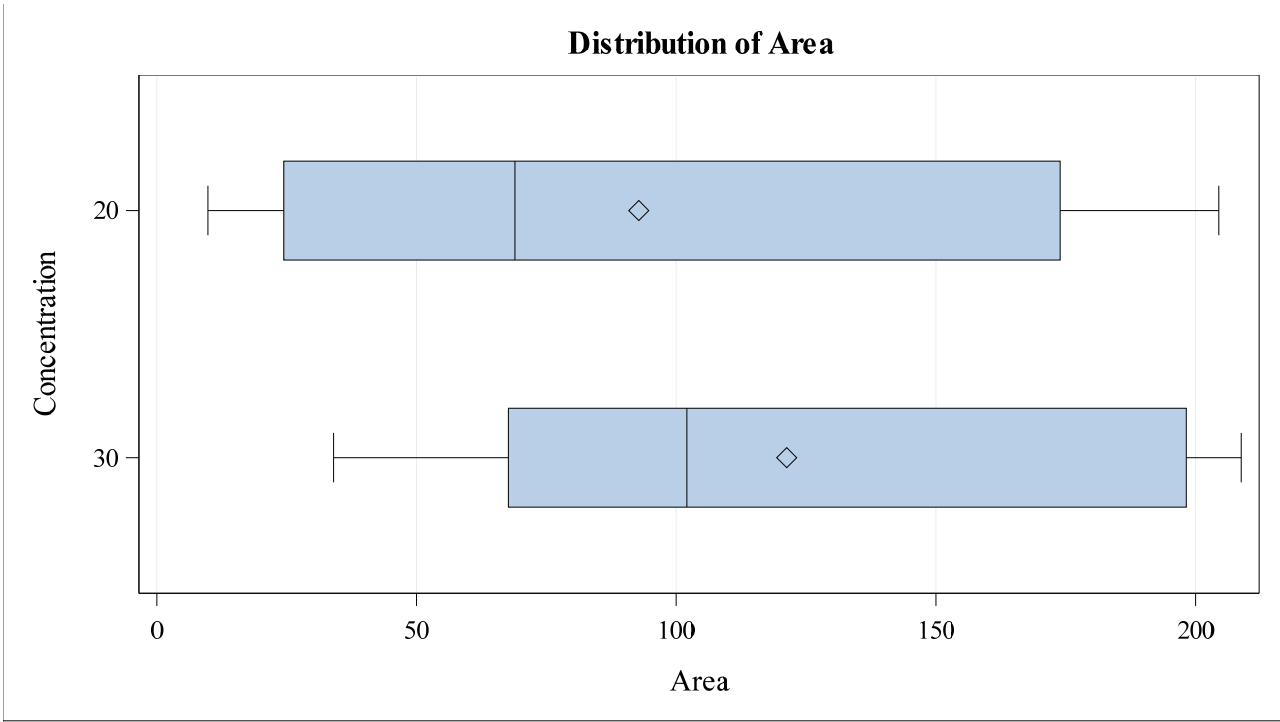

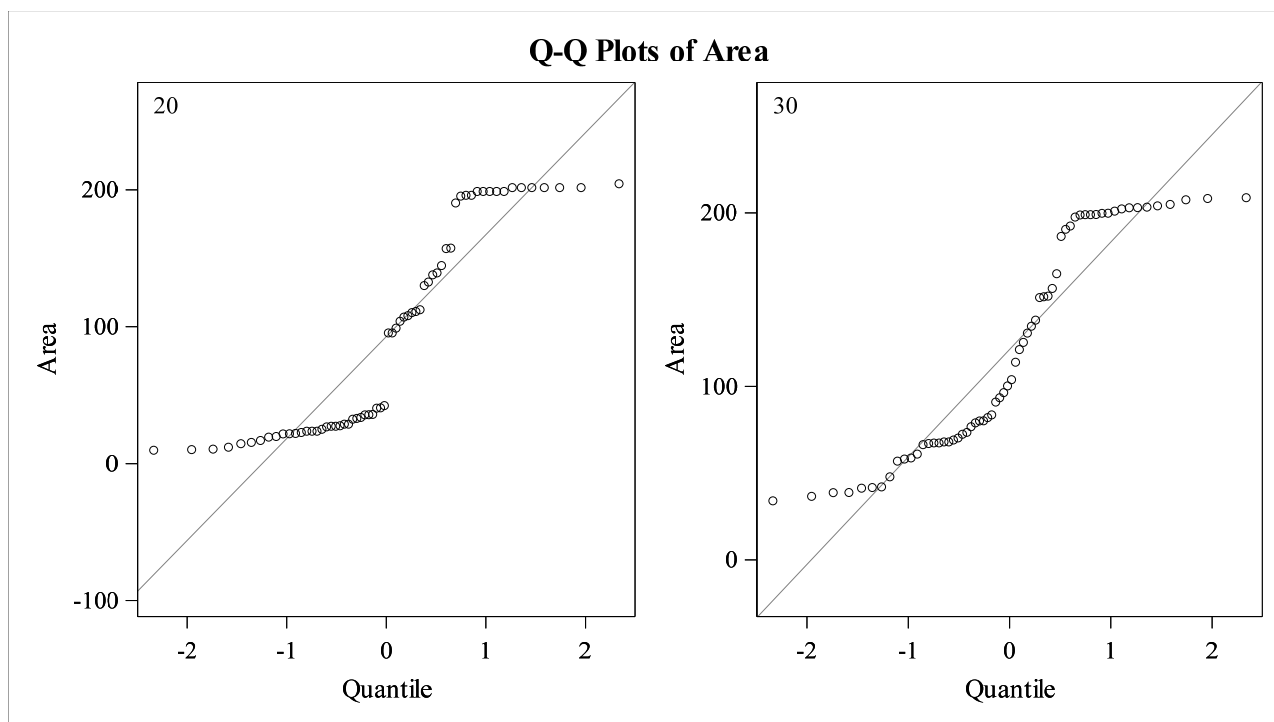

***Biomechanical evaluation***  
***Test of print height***

***Variable:***  
***Area***

| Print_height | Method        | N  | Mean    | Std Dev | Std Err | Minimum | Maximum |
|--------------|---------------|----|---------|---------|---------|---------|---------|
| 0.8          |               | 64 | 104.3   | 71.6215 | 8.9527  | 9.8200  | 207.6   |
| 1.2          |               | 64 | 109.8   | 68.1581 | 8.5198  | 16.9100 | 208.8   |
| Diff (1-2)   | Pooled        |    | -5.4277 | 69.9113 | 12.3587 |         |         |
| Diff (1-2)   | Satterthwaite |    | -5.4277 |         | 12.3587 |         |         |

| Print_height | Method        | Mean    | 95% CL Mean |         | Std Dev | 95% CL Std Dev |         |
|--------------|---------------|---------|-------------|---------|---------|----------------|---------|
| 0.8          |               | 104.3   | 86.4351     | 122.2   | 71.6215 | 61.0071        | 86.7423 |
| 1.2          |               | 109.8   | 92.7279     | 126.8   | 68.1581 | 58.0569        | 82.5476 |
| Diff (1-2)   | Pooled        | -5.4277 | -29.8851    | 19.0298 | 69.9113 | 62.2422        | 79.7527 |
| Diff (1-2)   | Satterthwaite | -5.4277 | -29.8857    | 19.0304 |         |                |         |

| Method        | Variances | DF     | t Value | Pr >  t |
|---------------|-----------|--------|---------|---------|
| Pooled        | Equal     | 126    | -0.44   | 0.6613  |
| Satterthwaite | Unequal   | 125.69 | -0.44   | 0.6613  |



| Equality of Variances |        |        |         |        |
|-----------------------|--------|--------|---------|--------|
| Method                | Num DF | Den DF | F Value | Pr > F |
| Folded F              | 63     | 63     | 1.10    | 0.6952 |

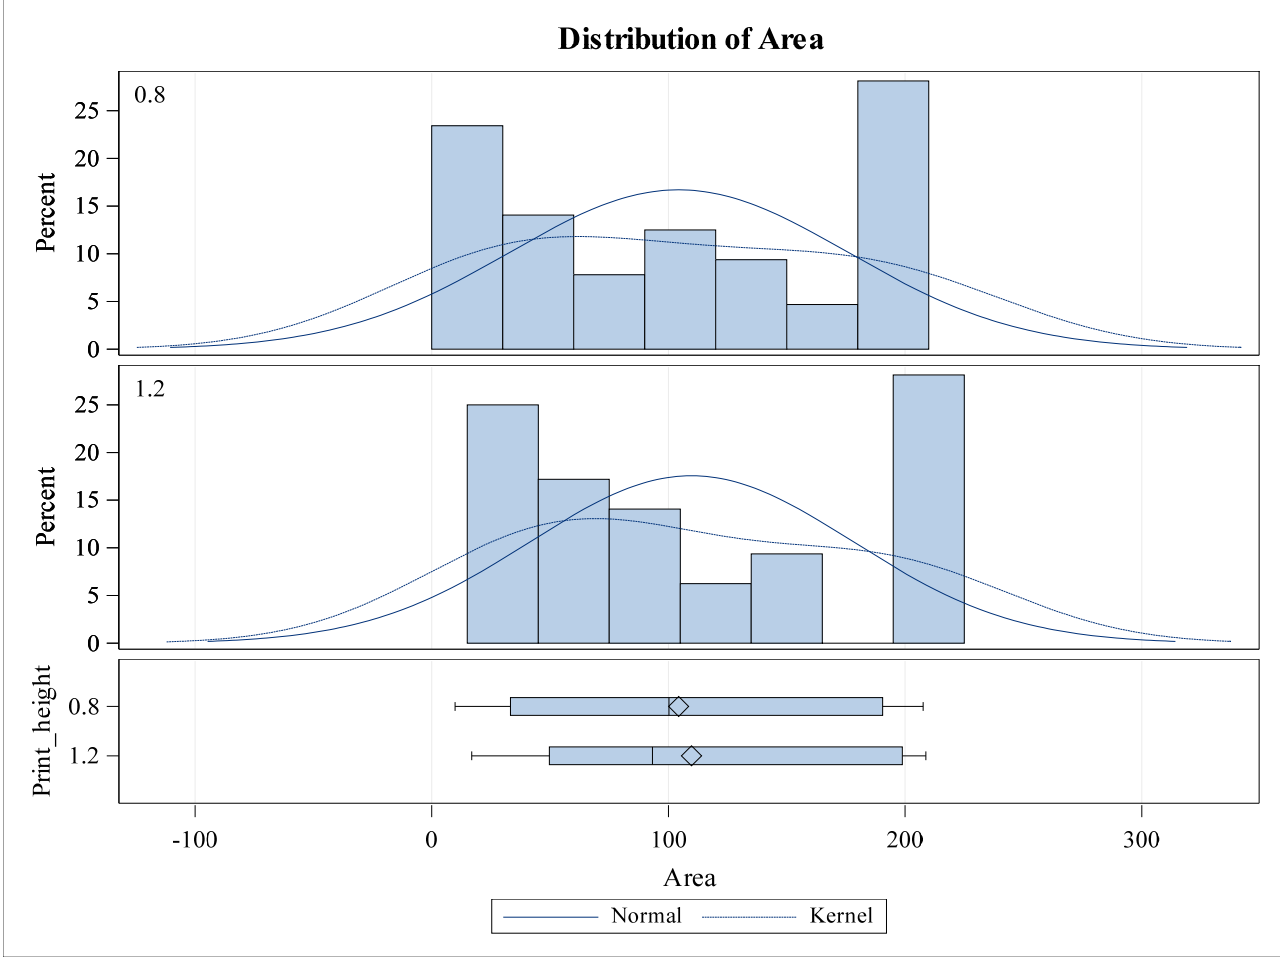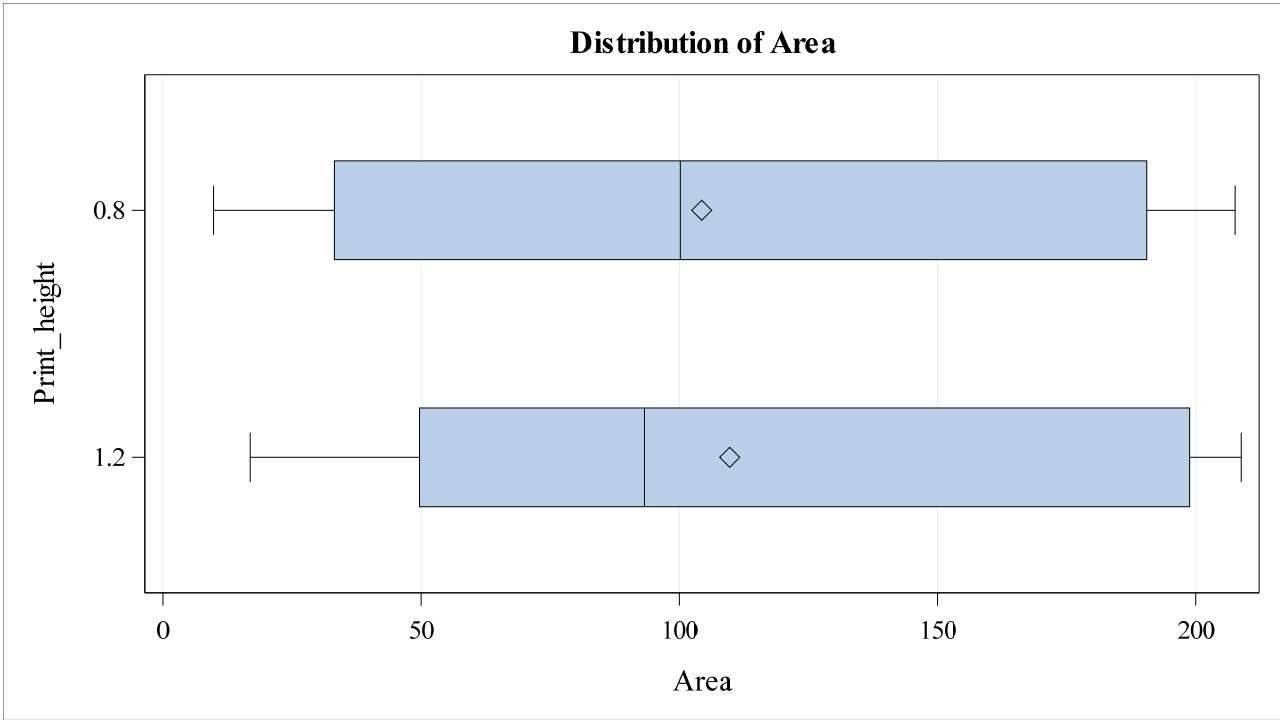

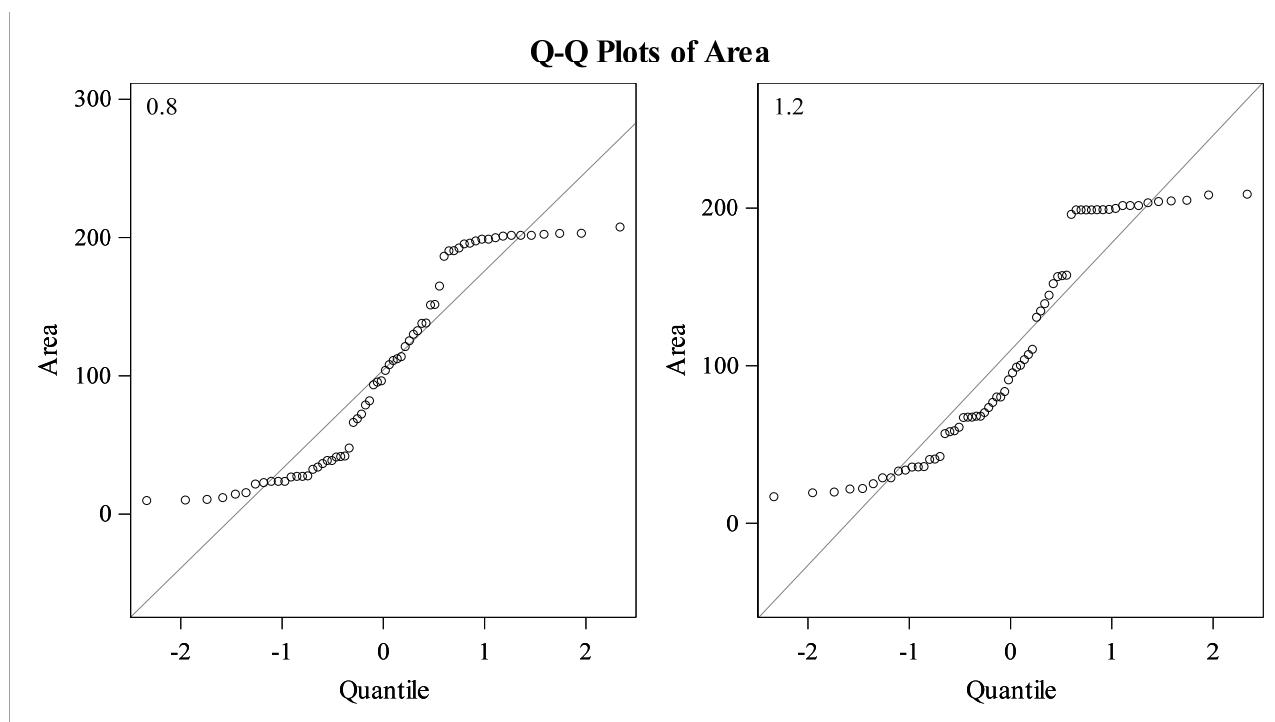

***Biomechanical evaluation***  
***Test of print height by collagen concentration***

***Variable:***  
***Area***

**Concentration=20**

| Print_height | Method        | N  | Mean    | Std Dev | Std Err | Minimum | Maximum |
|--------------|---------------|----|---------|---------|---------|---------|---------|
| 0.8          |               | 32 | 88.9450 | 75.8813 | 13.4141 | 9.8200  | 201.6   |
| 1.2          |               | 32 | 96.6559 | 73.9898 | 13.0797 | 16.9100 | 204.5   |
| Diff (1-2)   | Pooled        |    | -7.7109 | 74.9415 | 18.7354 |         |         |
| Diff (1-2)   | Satterthwaite |    | -7.7109 |         | 18.7354 |         |         |

| Print_height | Method        | Mean    | 95% CL Mean |         | Std Dev | 95% CL Std Dev |         |
|--------------|---------------|---------|-------------|---------|---------|----------------|---------|
| 0.8          |               | 88.9450 | 61.5869     | 116.3   | 75.8813 | 60.8343        | 100.9   |
| 1.2          |               | 96.6559 | 69.9798     | 123.3   | 73.9898 | 59.3178        | 98.3679 |
| Diff (1-2)   | Pooled        | -7.7109 | -45.1624    | 29.7406 | 74.9415 | 63.7595        | 90.9166 |
| Diff (1-2)   | Satterthwaite | -7.7109 | -45.1629    | 29.7410 |         |                |         |

| Method        | Variances | DF     | t Value | Pr >  t |
|---------------|-----------|--------|---------|---------|
| Pooled        | Equal     | 62     | -0.41   | 0.6821  |
| Satterthwaite | Unequal   | 61.961 | -0.41   | 0.6821  |

| Equality of Variances |        |        |         |        |
|-----------------------|--------|--------|---------|--------|
| Method                | Num DF | Den DF | F Value | Pr > F |
| Folded F              | 31     | 31     | 1.05    | 0.8891 |

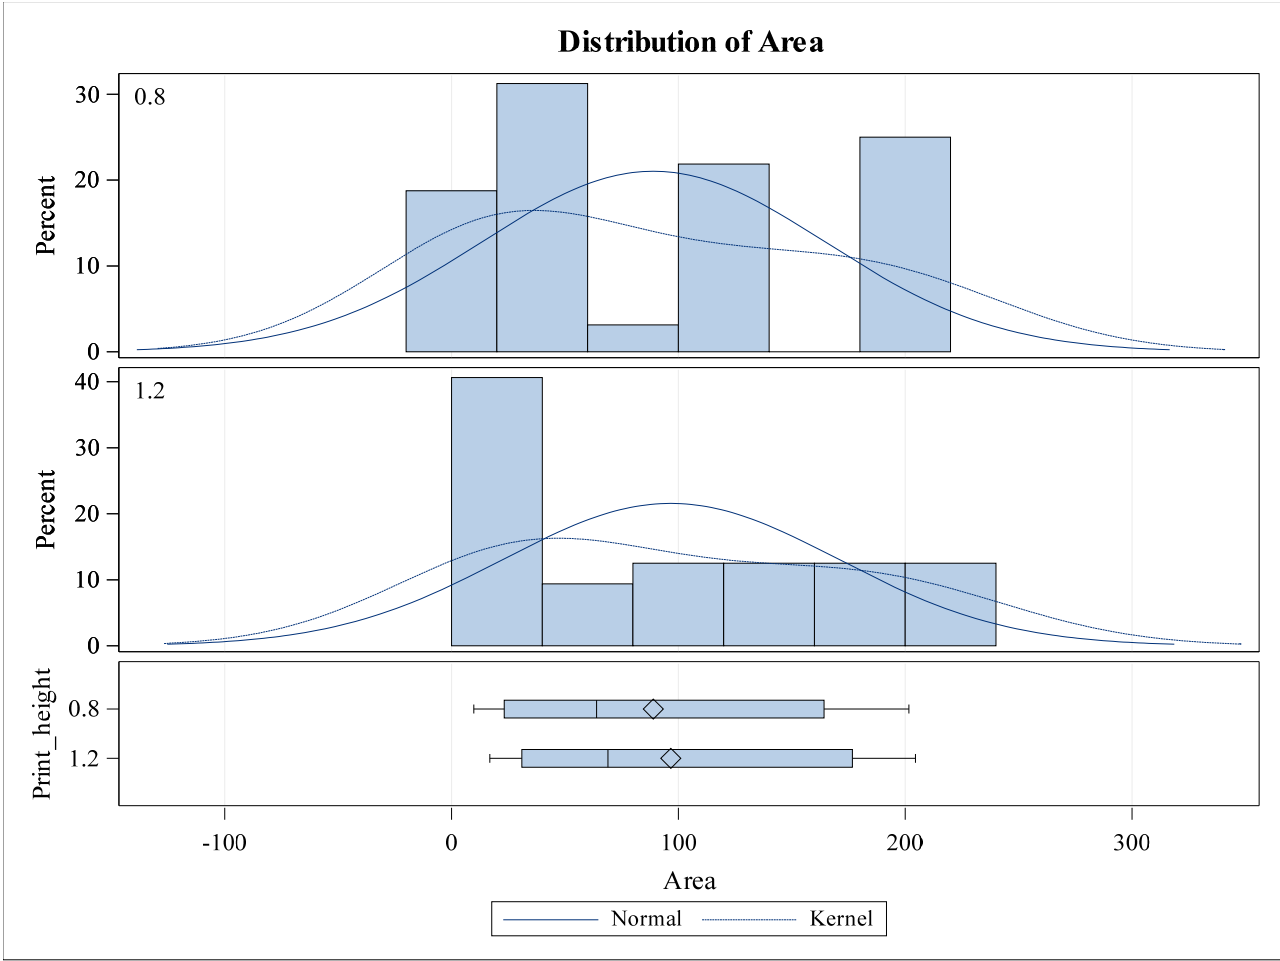

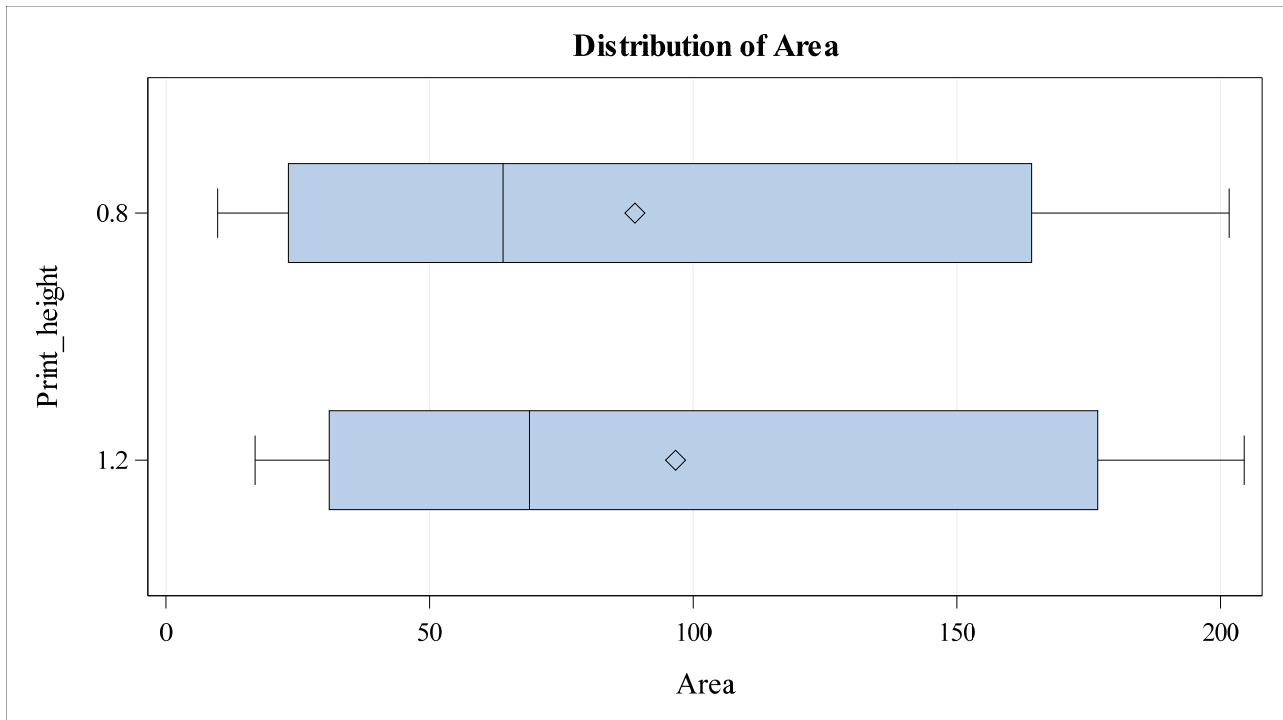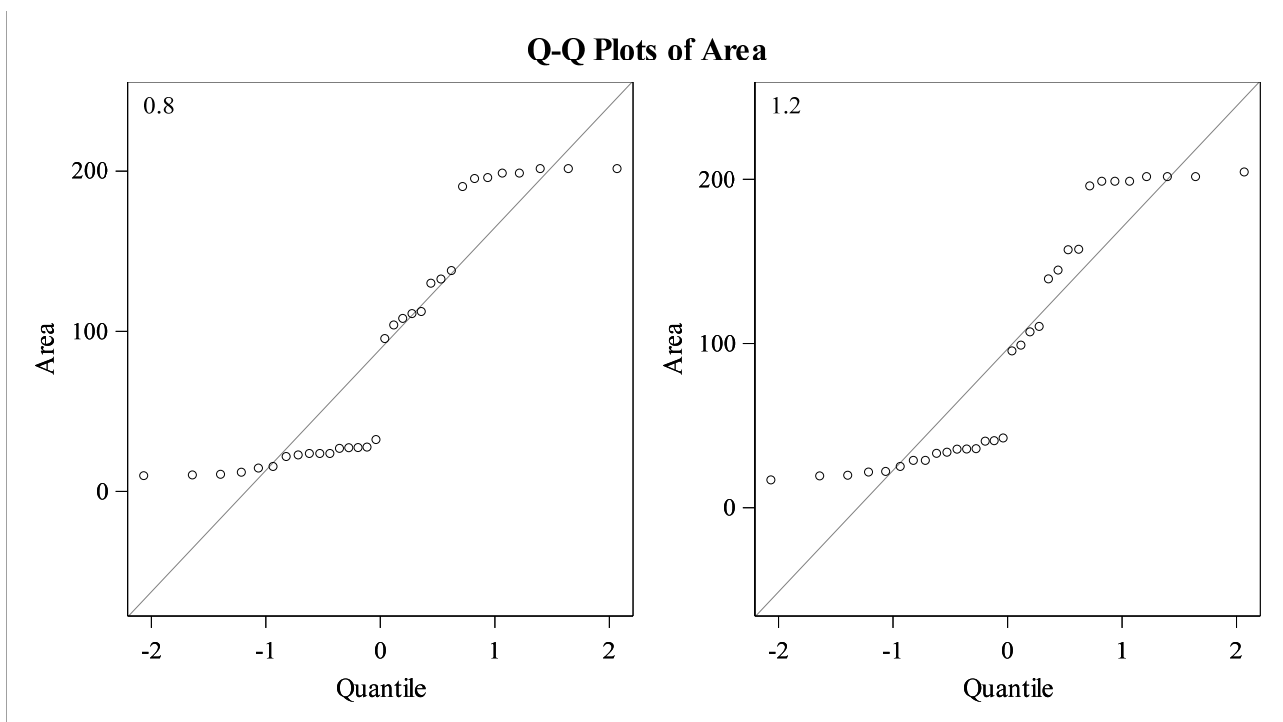

*Variable:*  
*Area*

**Concentration=30**

| Print_height | Method | N  | Mean    | Std Dev | Std Err | Minimum | Maximum |
|--------------|--------|----|---------|---------|---------|---------|---------|
| 0.8          |        | 32 | 119.7   | 64.6405 | 11.4269 | 34.0300 | 207.6   |
| 1.2          |        | 32 | 122.9   | 60.1021 | 10.6247 | 56.9400 | 208.8   |
| Diff (1-2)   | Pooled |    | -3.1444 | 62.4126 | 15.6031 |         |         |

| Print_height | Method        | N | Mean    | Std Dev | Std Err | Minimum | Maximum |
|--------------|---------------|---|---------|---------|---------|---------|---------|
| Diff (1-2)   | Satterthwaite |   | -3.1444 |         | 15.6031 |         |         |

| Print_height | Method        | Mean    | 95% CL Mean |         | Std Dev | 95% CL Std Dev |         |
|--------------|---------------|---------|-------------|---------|---------|----------------|---------|
| 0.8          |               | 119.7   | 96.4009     | 143.0   | 64.6405 | 51.8225        | 85.9382 |
| 1.2          |               | 122.9   | 101.2       | 144.5   | 60.1021 | 48.1841        | 79.9046 |
| Diff (1-2)   | Pooled        | -3.1444 | -34.3346    | 28.0459 | 62.4126 | 53.1000        | 75.7169 |
| Diff (1-2)   | Satterthwaite | -3.1444 | -34.3379    | 28.0491 |         |                |         |

| Method        | Variances | DF     | t Value | Pr >  t |
|---------------|-----------|--------|---------|---------|
| Pooled        | Equal     | 62     | -0.20   | 0.8410  |
| Satterthwaite | Unequal   | 61.674 | -0.20   | 0.8410  |

| Equality of Variances |        |        |         |        |
|-----------------------|--------|--------|---------|--------|
| Method                | Num DF | Den DF | F Value | Pr > F |
| Folded F              | 31     | 31     | 1.16    | 0.6878 |

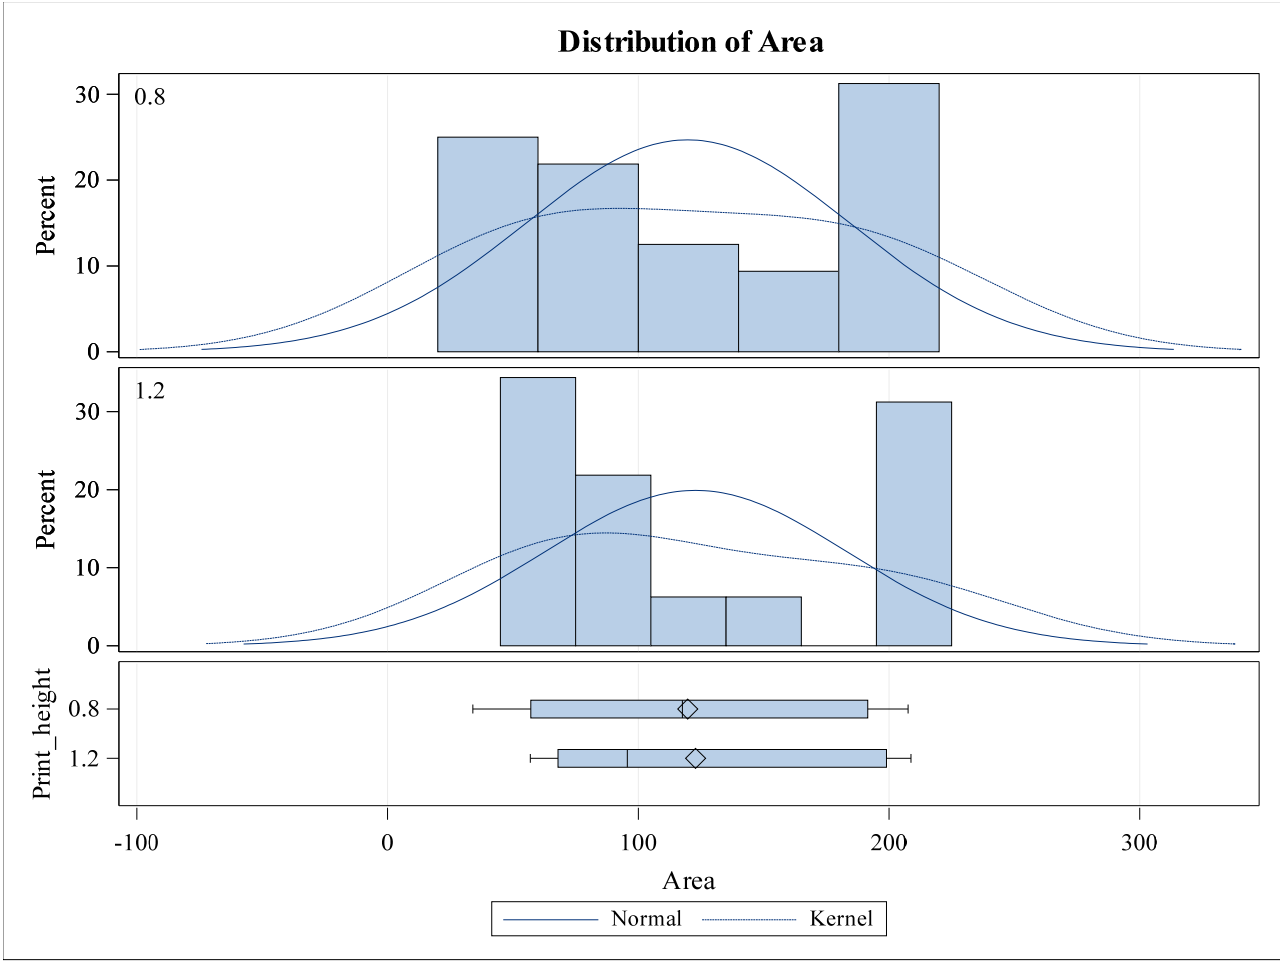

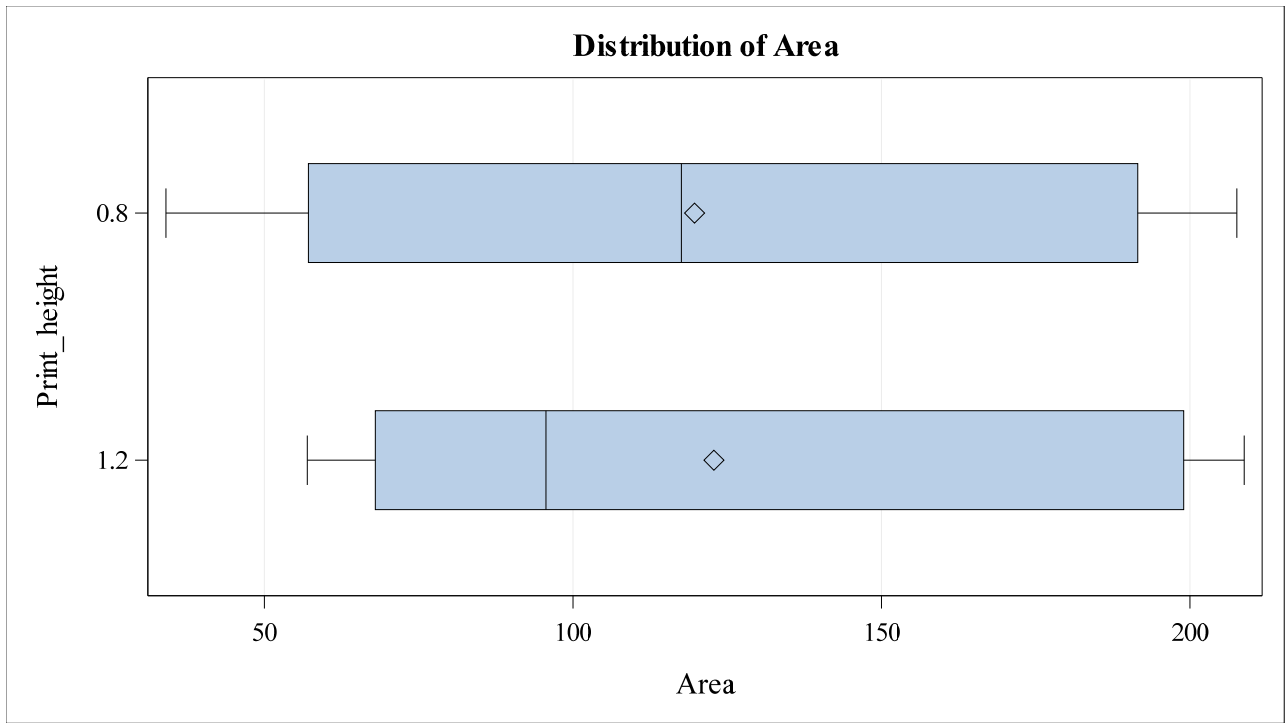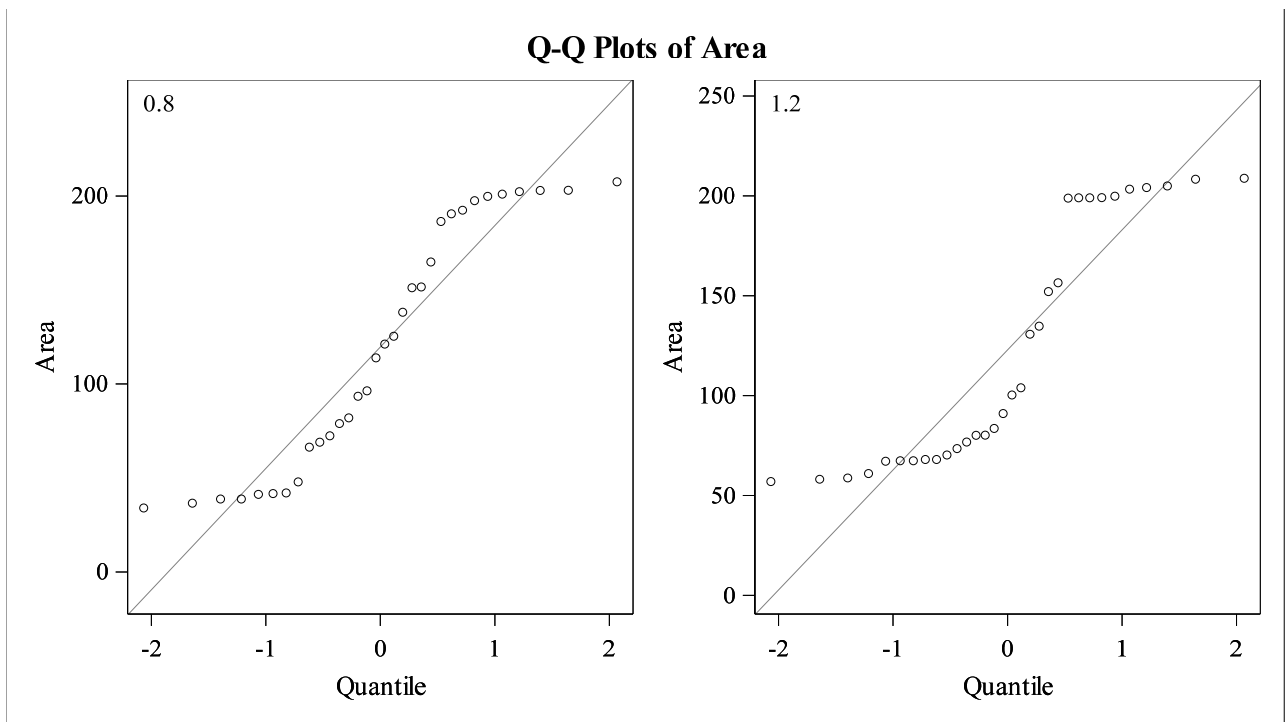

***Biomechanical evaluation***  
***Test of day by collagen concentration***

**Concentration=20**

| Class Level Information |        |           |
|-------------------------|--------|-----------|
| Class                   | Levels | Values    |
| Day                     | 5      | 0 1 3 5 7 |

|                             |    |
|-----------------------------|----|
| Number of Observations Read | 40 |
| Number of Observations Used | 40 |

*Dependent Variable: Area*

**Concentration=20**

| Source                 | DF | Sum of Squares | Mean Square | F Value | Pr > F |
|------------------------|----|----------------|-------------|---------|--------|
| <b>Model</b>           | 4  | 65492.61153    | 16373.15288 | 29.22   | <.0001 |
| <b>Error</b>           | 35 | 19614.80616    | 560.42303   |         |        |
| <b>Corrected Total</b> | 39 | 85107.41770    |             |         |        |

| R-Square | Coeff Var | Root MSE | Area Mean |
|----------|-----------|----------|-----------|
| 0.769529 | 20.11497  | 23.67326 | 117.6898  |

| Source     | DF | Anova SS    | Mean Square | F Value | Pr > F |
|------------|----|-------------|-------------|---------|--------|
| <b>Day</b> | 4  | 65492.61153 | 16373.15288 | 29.22   | <.0001 |

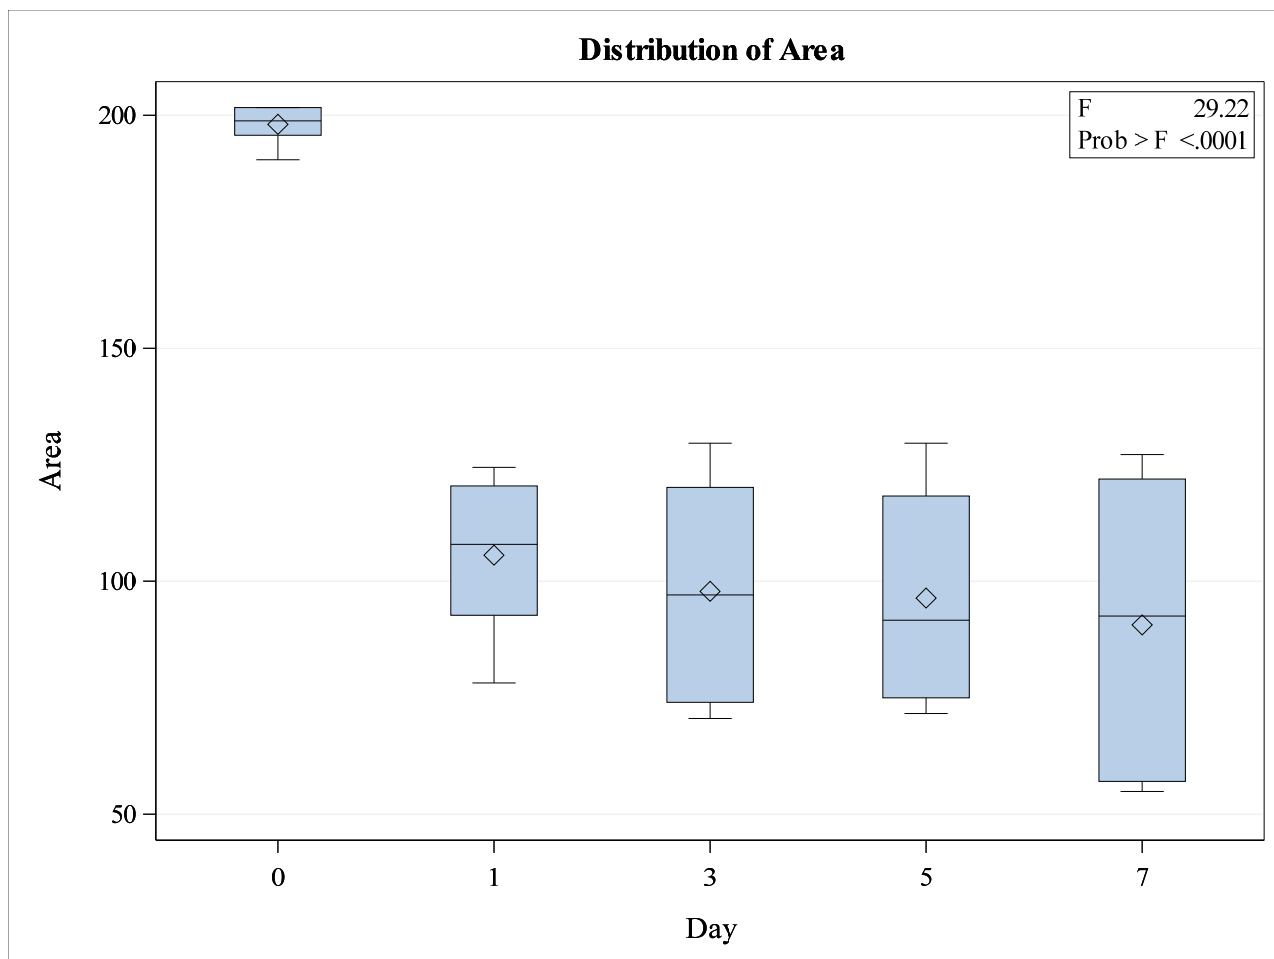

**Concentration=30**

| Class Level Information |        |           |
|-------------------------|--------|-----------|
| Class                   | Levels | Values    |
| Day                     | 5      | 0 1 3 5 7 |

|                             |    |
|-----------------------------|----|
| Number of Observations Read | 40 |
| Number of Observations Used | 40 |

***Dependent Variable: Area***

**Concentration=30**

| Source                 | DF | Sum of Squares | Mean Square | F Value | Pr > F |
|------------------------|----|----------------|-------------|---------|--------|
| <b>Model</b>           | 4  | 8771.99462     | 2192.99866  | 6.59    | 0.0005 |
| <b>Error</b>           | 35 | 11642.17938    | 332.63370   |         |        |
| <b>Corrected Total</b> | 39 | 20414.17400    |             |         |        |

| R-Square | Coeff Var | Root MSE | Area Mean |
|----------|-----------|----------|-----------|
| 0.429701 | 10.43169  | 18.23825 | 174.8350  |



| Source | DF | Anova SS    | Mean Square | F Value | Pr > F |
|--------|----|-------------|-------------|---------|--------|
| Day    | 4  | 8771.994625 | 2192.998656 | 6.59    | 0.0005 |

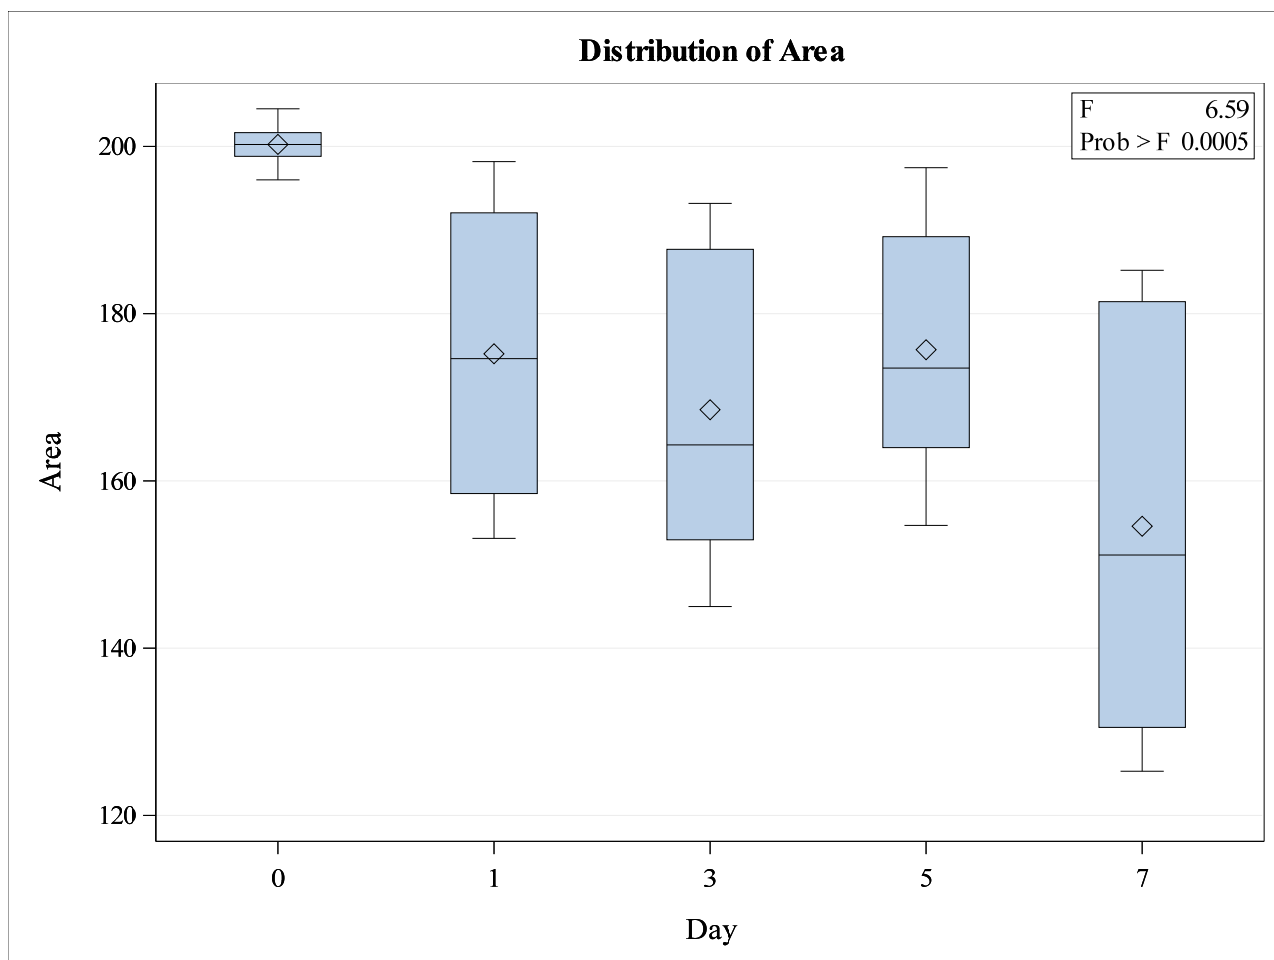

***Biomechanical evaluation***  
***Test of day by collagen concentration***

***Variable:***  
***Area***

**Concentration=20**

| Cultivation | Method        | N  | Mean     | Std Dev | Std Err | Minimum | Maximum |
|-------------|---------------|----|----------|---------|---------|---------|---------|
| D           |               | 20 | 99.1900  | 51.6515 | 11.5496 | 54.8700 | 201.6   |
| S           |               | 20 | 136.2    | 33.0296 | 7.3857  | 106.6   | 201.6   |
| Diff (1-2)  | Pooled        |    | -36.9995 | 43.3522 | 13.7092 |         |         |
| Diff (1-2)  | Satterthwaite |    | -36.9995 |         | 13.7092 |         |         |

| Cultivation | Method        | Mean     | 95% CL Mean |         | Std Dev | 95% CL Std Dev |         |
|-------------|---------------|----------|-------------|---------|---------|----------------|---------|
| D           |               | 99.1900  | 75.0164     | 123.4   | 51.6515 | 39.2804        | 75.4407 |
| S           |               | 136.2    | 120.7       | 151.6   | 33.0296 | 25.1187        | 48.2422 |
| Diff (1-2)  | Pooled        | -36.9995 | -64.7523    | -9.2467 | 43.3522 | 35.4294        | 55.8714 |
| Diff (1-2)  | Satterthwaite | -36.9995 | -64.9136    | -9.0854 |         |                |         |

| Method        | Variances | DF     | t Value | Pr >  t |
|---------------|-----------|--------|---------|---------|
| Pooled        | Equal     | 38     | -2.70   | 0.0103  |
| Satterthwaite | Unequal   | 32.313 | -2.70   | 0.0110  |

| Equality of Variances |        |        |         |        |
|-----------------------|--------|--------|---------|--------|
| Method                | Num DF | Den DF | F Value | Pr > F |
| Folded F              | 19     | 19     | 2.45    | 0.0583 |

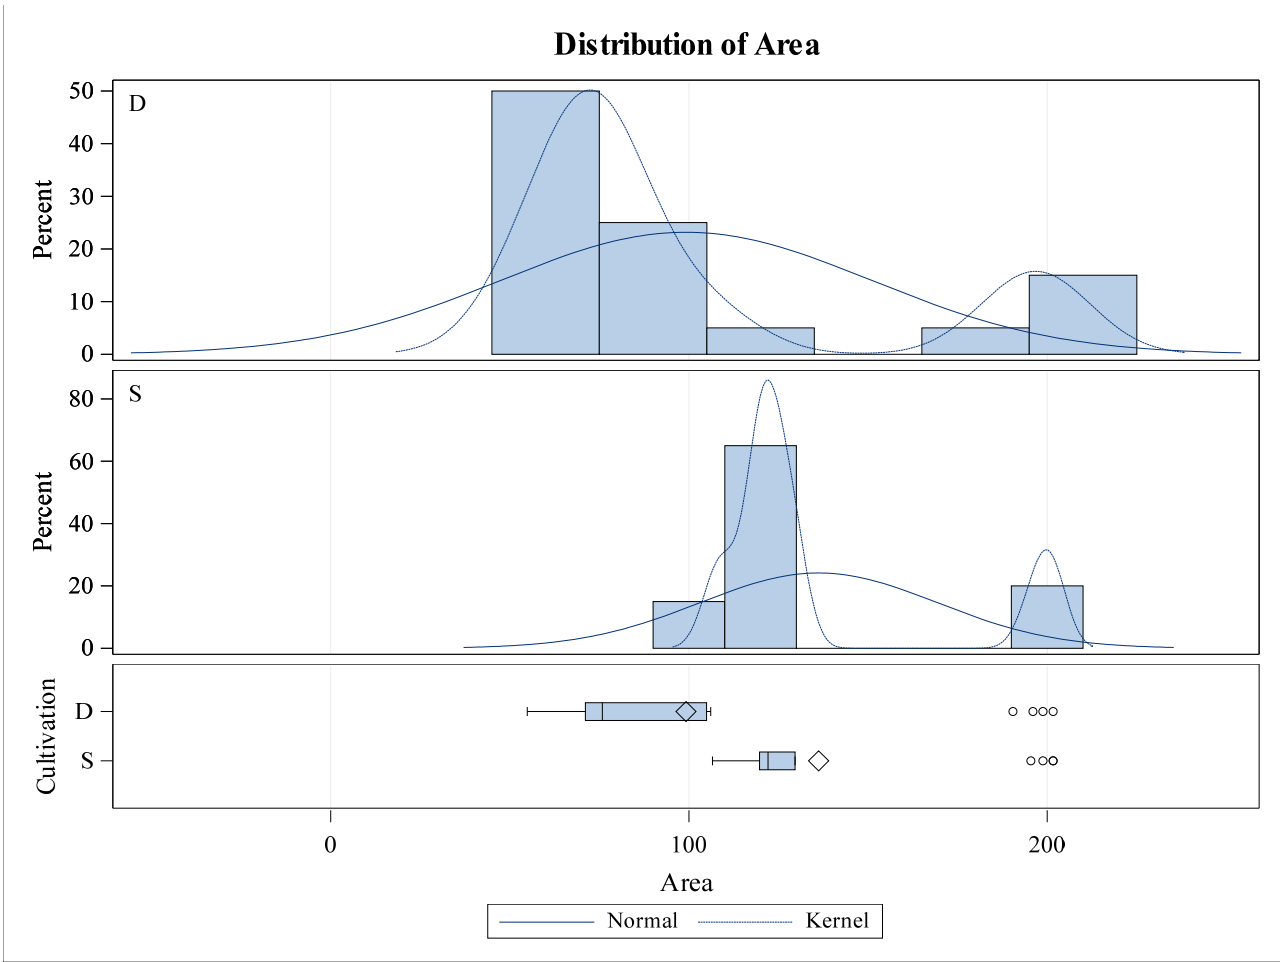



**Variable:**  
**Area**

**Concentration=30**

| Cultivation | Method | N  | Mean     | Std Dev | Std Err | Minimum | Maximum |
|-------------|--------|----|----------|---------|---------|---------|---------|
| D           |        | 20 | 160.4    | 23.2004 | 5.1878  | 125.3   | 201.6   |
| S           |        | 20 | 189.3    | 9.8511  | 2.2028  | 168.4   | 204.5   |
| Diff (1-2)  | Pooled |    | -28.8850 | 17.8228 | 5.6361  |         |         |

| Cultivation | Method        | N | Mean     | Std Dev | Std Err | Minimum | Maximum |
|-------------|---------------|---|----------|---------|---------|---------|---------|
| Diff (1-2)  | Satterthwaite |   | -28.8850 |         | 5.6361  |         |         |

| Cultivation | Method        | Mean     | 95% CL Mean |          | Std Dev | 95% CL Std Dev |         |
|-------------|---------------|----------|-------------|----------|---------|----------------|---------|
| D           |               | 160.4    | 149.5       | 171.3    | 23.2004 | 17.6437        | 33.8858 |
| S           |               | 189.3    | 184.7       | 193.9    | 9.8511  | 7.4917         | 14.3882 |
| Diff (1-2)  | Pooled        | -28.8850 | -40.2946    | -17.4754 | 17.8228 | 14.5656        | 22.9696 |
| Diff (1-2)  | Satterthwaite | -28.8850 | -40.4781    | -17.2919 |         |                |         |

| Method        | Variances | DF     | t Value | Pr >  t |
|---------------|-----------|--------|---------|---------|
| Pooled        | Equal     | 38     | -5.13   | <.0001  |
| Satterthwaite | Unequal   | 25.635 | -5.13   | <.0001  |

| Equality of Variances |        |        |         |        |
|-----------------------|--------|--------|---------|--------|
| Method                | Num DF | Den DF | F Value | Pr > F |
| Folded F              | 19     | 19     | 5.55    | 0.0005 |





***Biomechanical evaluation***  
***Linear regression of area by collagen concentration***

***Model: MODEL1***  
***Dependent Variable: Area***

**Concentration=20**

|                             |    |
|-----------------------------|----|
| Number of Observations Read | 64 |
|-----------------------------|----|

|                             |    |
|-----------------------------|----|
| Number of Observations Used | 64 |
|-----------------------------|----|

***Stepwise Selection: Step 1***

***Variable Day Entered: R-Square = 0.8147 and C(p) = 1.0390***

| Analysis of Variance |    |                |             |         |        |
|----------------------|----|----------------|-------------|---------|--------|
| Source               | DF | Sum of Squares | Mean Square | F Value | Pr > F |
| Model                | 1  | 284452         | 284452      | 272.56  | <.0001 |
| Error                | 62 | 64705          | 1043.63325  |         |        |
| Corrected Total      | 63 | 349158         |             |         |        |

| Variable  | Parameter Estimate | Standard Error | Type II SS | F Value | Pr > F |
|-----------|--------------------|----------------|------------|---------|--------|
| Intercept | 170.91492          | 6.22045        | 787887     | 754.95  | <.0001 |
| Day       | -34.71753          | 2.10290        | 284452     | 272.56  | <.0001 |

***Bounds on condition number: 1, 1***

***All variables left in the model are significant at the 0.1500 level.***

***No other variable met the 0.1500 significance level for entry into the model.***

| Summary of Stepwise Selection |                  |                  |       |                |                  |                |        |         |        |
|-------------------------------|------------------|------------------|-------|----------------|------------------|----------------|--------|---------|--------|
| Step                          | Variable Entered | Variable Removed | Label | Number Vars In | Partial R-Square | Model R-Square | C(p)   | F Value | Pr > F |
| 1                             | Day              |                  |       | 1              | 0.8147           | 0.8147         | 1.0390 | 272.56  | <.0001 |

***Model: MODEL1***

***Dependent Variable: Area***

Concentration=20

Fit Diagnostics for Area

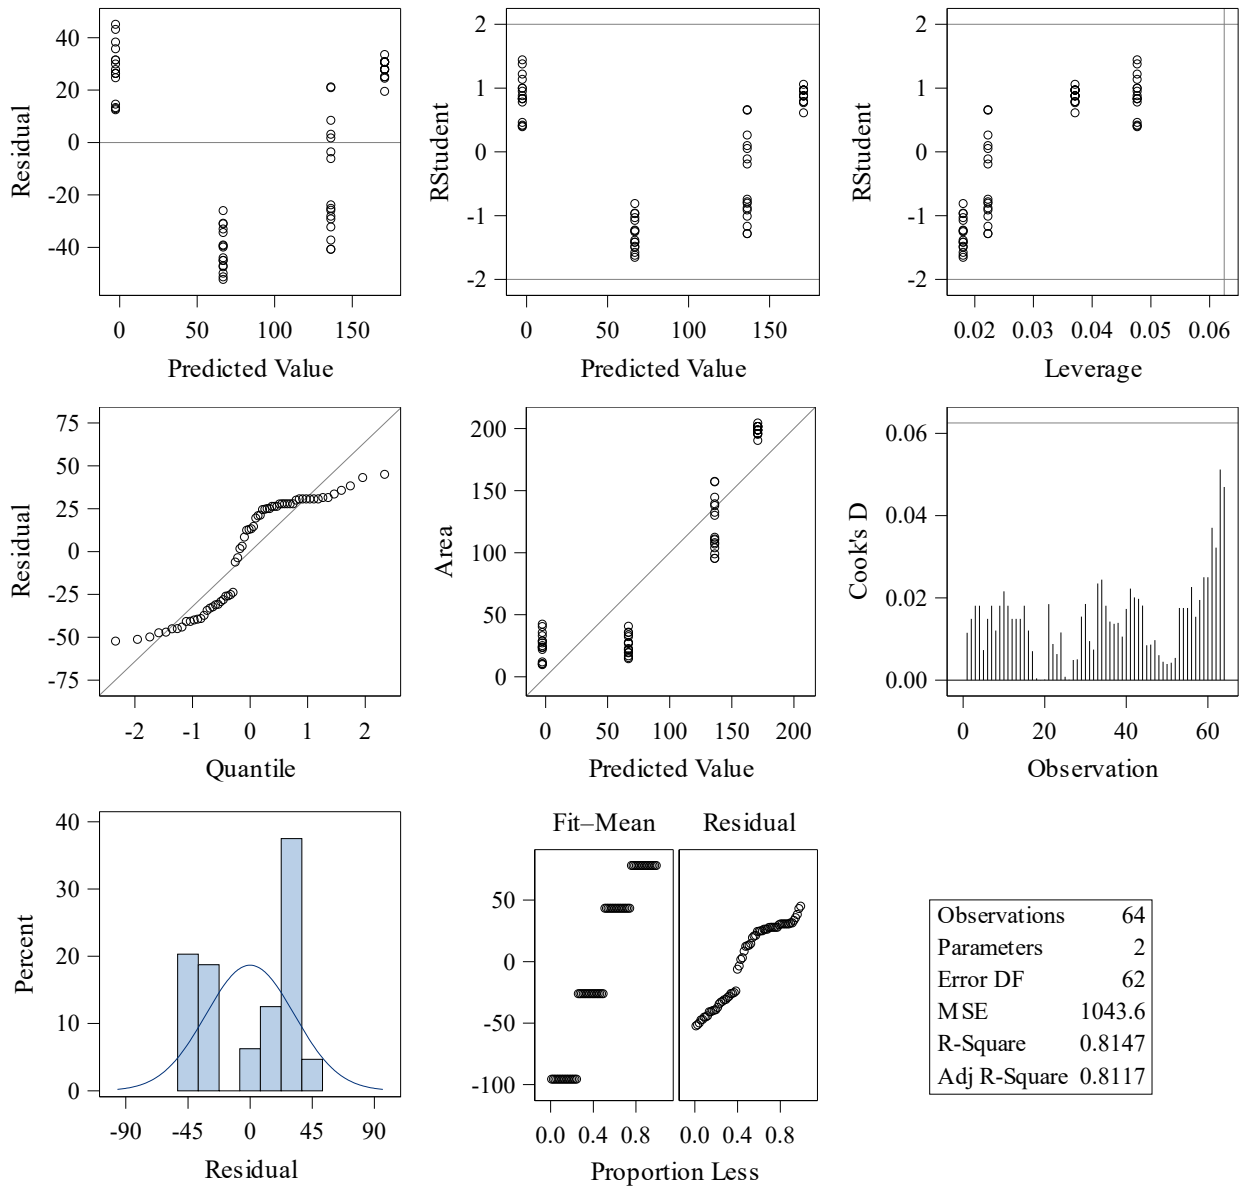

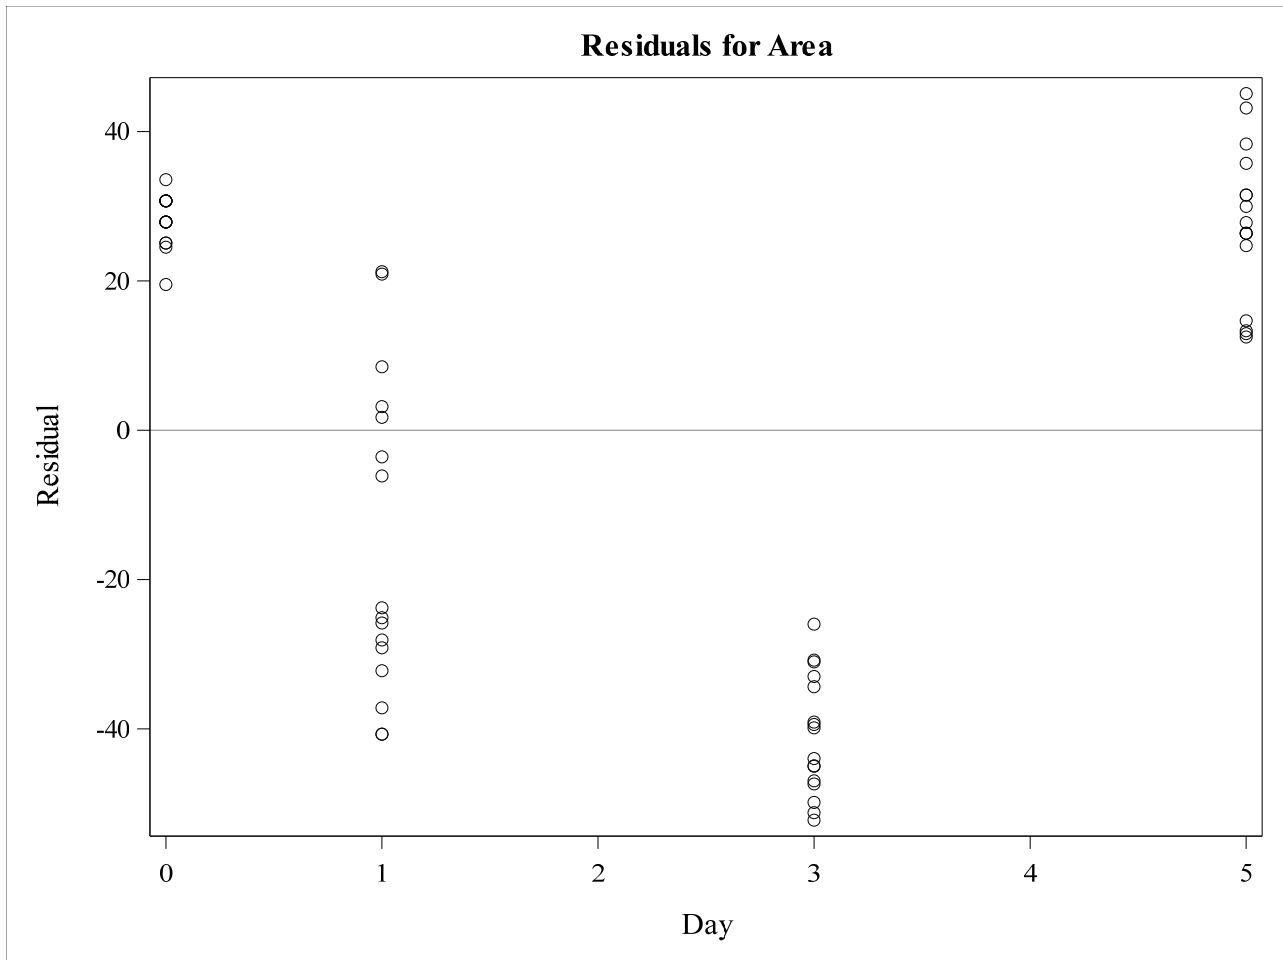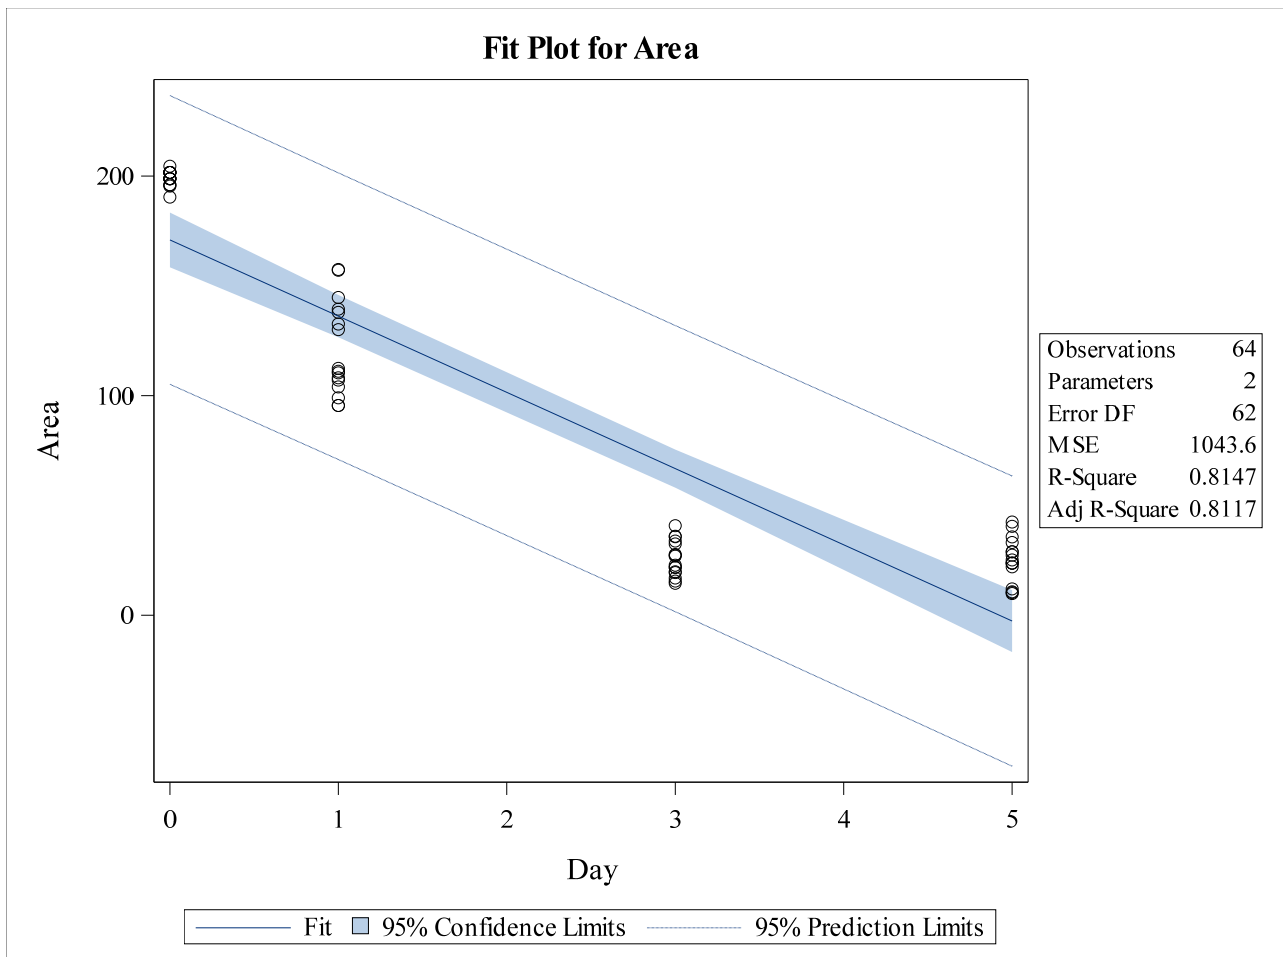



**Model: MODEL1**

**Dependent Variable: Area**

**Concentration=30**

|                                    |    |
|------------------------------------|----|
| <b>Number of Observations Read</b> | 64 |
| <b>Number of Observations Used</b> | 64 |

**Stepwise Selection: Step 1**

**Variable Day Entered: R-Square = 0.7269 and C(p) = 0.1631**

| Analysis of Variance   |    |                |             |         |        |
|------------------------|----|----------------|-------------|---------|--------|
| Source                 | DF | Sum of Squares | Mean Square | F Value | Pr > F |
| <b>Model</b>           | 1  | 175675         | 175675      | 165.04  | <.0001 |
| <b>Error</b>           | 62 | 65994          | 1064.41800  |         |        |
| <b>Corrected Total</b> | 63 | 241669         |             |         |        |

| Variable         | Parameter Estimate | Standard Error | Type II SS | F Value | Pr > F |
|------------------|--------------------|----------------|------------|---------|--------|
| <b>Intercept</b> | 182.66611          | 6.28209        | 899953     | 845.49  | <.0001 |
| <b>Day</b>       | -27.28341          | 2.12373        | 175675     | 165.04  | <.0001 |

**Bounds on condition number: 1, 1**

**All variables left in the model are significant at the 0.1500 level.**

**No other variable met the 0.1500 significance level for entry into the model.**

| Summary of Stepwise Selection |                  |                  |       |                |                  |                |        |         |        |
|-------------------------------|------------------|------------------|-------|----------------|------------------|----------------|--------|---------|--------|
| Step                          | Variable Entered | Variable Removed | Label | Number Vars In | Partial R-Square | Model R-Square | C(p)   | F Value | Pr > F |
| <b>1</b>                      | Day              |                  |       | 1              | 0.7269           | 0.7269         | 0.1631 | 165.04  | <.0001 |

**Model: MODEL1**

**Dependent Variable: Area**

Concentration=30

Fit Diagnostics for Area

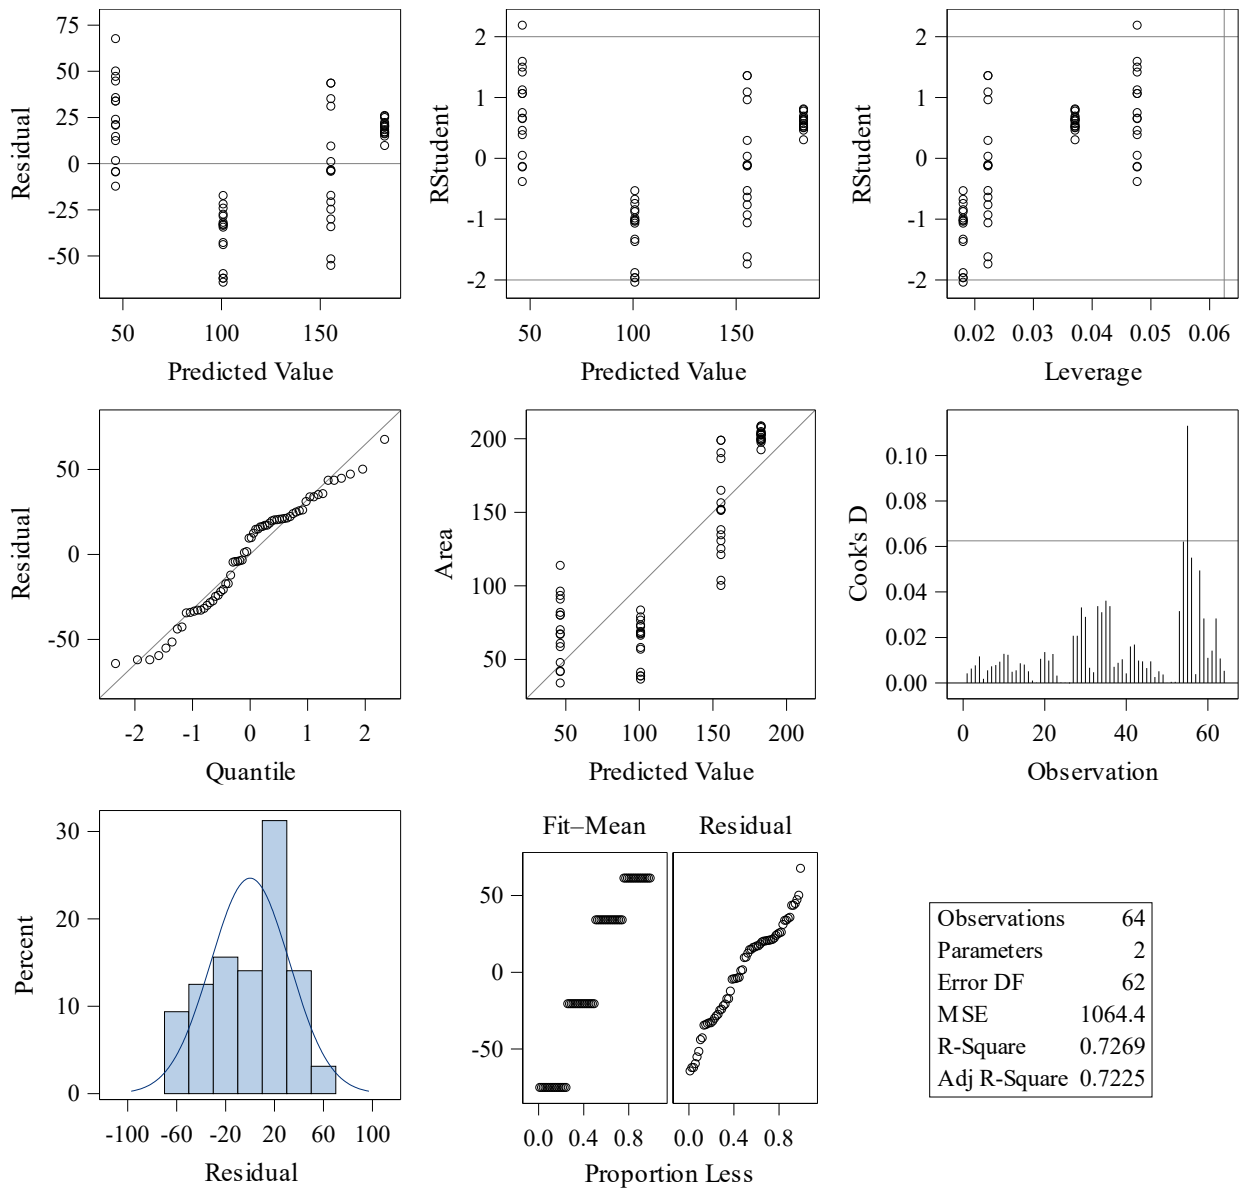

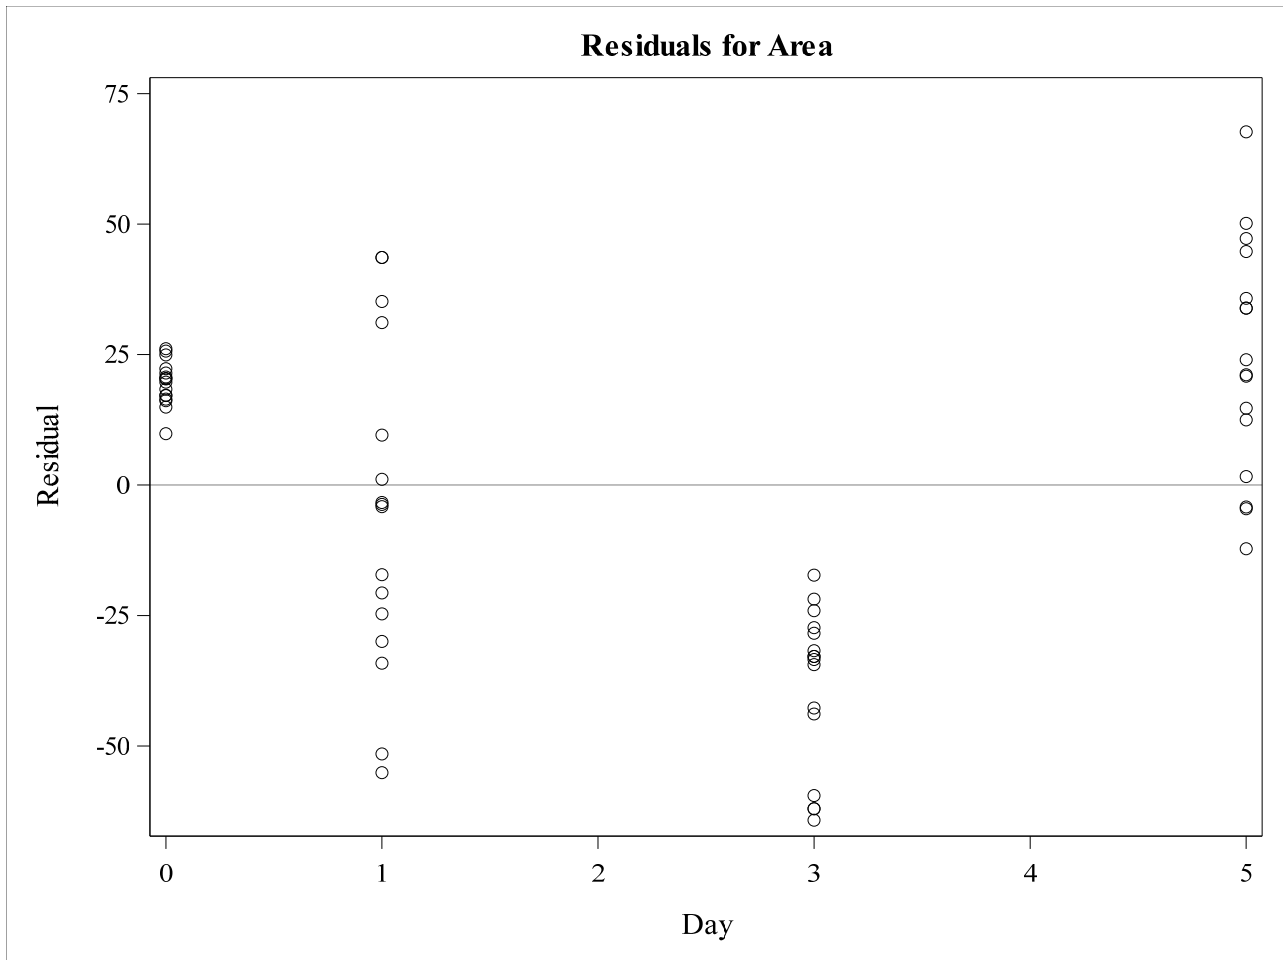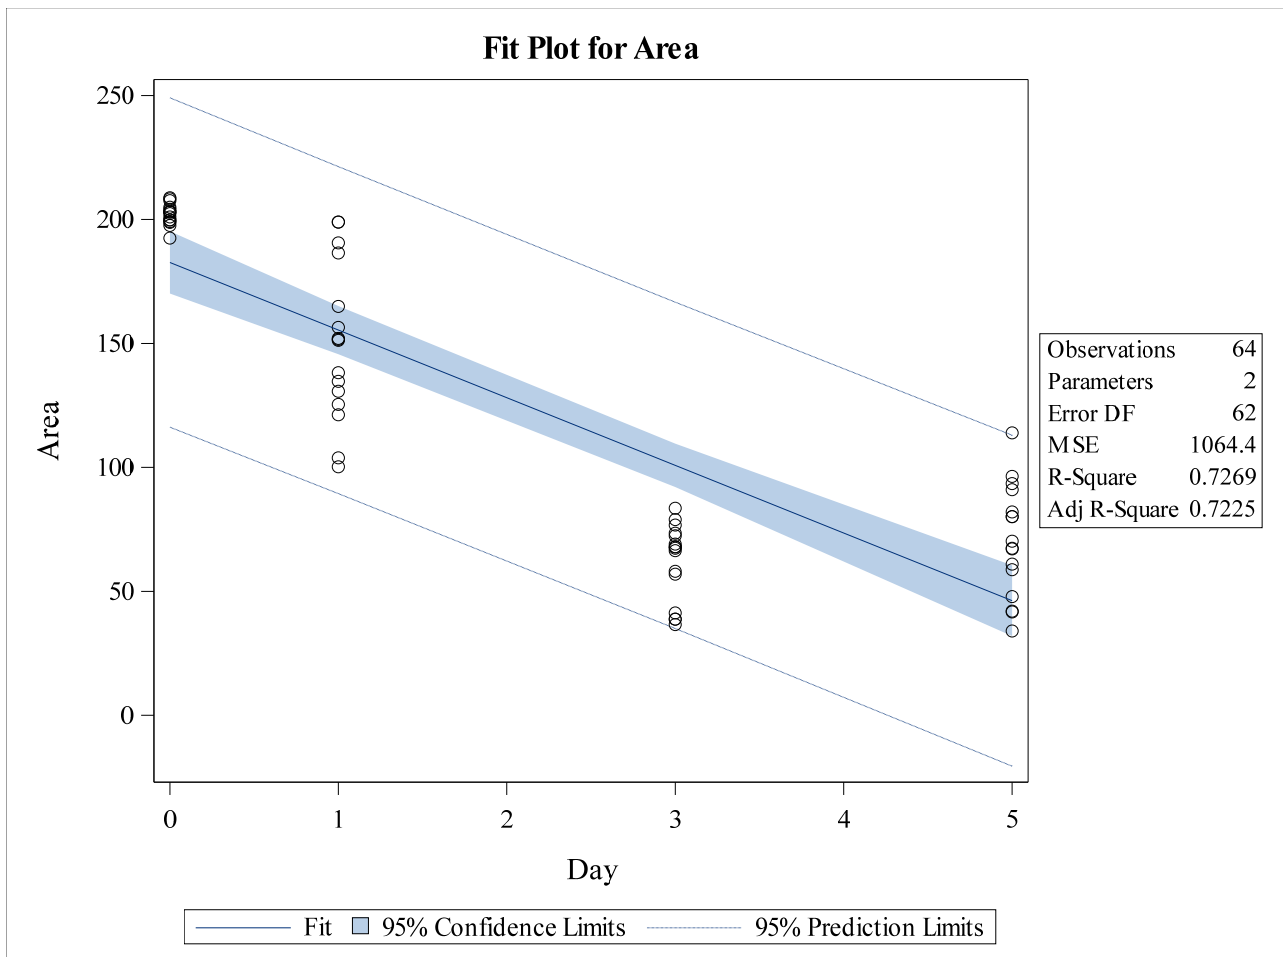

*Additional evaluations*  
*Proliferation medium*  
**Linear Regression of Area by Day, Concentration a Cultivation**

*Model: MODEL1*  
*Dependent Variable: Area Area*

|                             |    |
|-----------------------------|----|
| Number of Observations Read | 80 |
| Number of Observations Used | 80 |

*Stepwise Selection: Step 1*

*Variable Concentration Entered: R-Square = 0.3713 and C(p) = 89.0535*

| Analysis of Variance |    |                |             |         |        |
|----------------------|----|----------------|-------------|---------|--------|
| Source               | DF | Sum of Squares | Mean Square | F Value | Pr > F |
| Model                | 1  | 64198          | 64198       | 46.07   | <.0001 |
| Error                | 78 | 108698         | 1393.55855  |         |        |
| Corrected Total      | 79 | 172896         |             |         |        |

| Variable      | Parameter Estimate | Standard Error | Type II SS | F Value | Pr > F |
|---------------|--------------------|----------------|------------|---------|--------|
| Intercept     | 4.86700            | 21.28160       | 72.88520   | 0.05    | 0.8197 |
| Concentration | 5.66560            | 0.83473        | 64198      | 46.07   | <.0001 |

*Bounds on condition number: 1, 1*

*Stepwise Selection: Step 2*

*Variable Day Entered: R-Square = 0.5849 and C(p) = 34.9901*

| Analysis of Variance |    |                |             |         |        |
|----------------------|----|----------------|-------------|---------|--------|
| Source               | DF | Sum of Squares | Mean Square | F Value | Pr > F |
| Model                | 2  | 101119         | 50560       | 54.24   | <.0001 |
| Error                | 77 | 71776          | 932.16142   |         |        |
| Corrected Total      | 79 | 172896         |             |         |        |

| Variable      | Parameter Estimate | Standard Error | Type II SS | F Value | Pr > F |
|---------------|--------------------|----------------|------------|---------|--------|
| Intercept     | 31.70750           | 17.92041       | 2918.22923 | 3.13    | 0.0808 |
| Day           | -8.38766           | 1.33275        | 36921      | 39.61   | <.0001 |
| Concentration | 5.66560            | 0.68270        | 64198      | 68.87   | <.0001 |

*Bounds on condition number: 1, 4*

*Stepwise Selection: Step 3*

*Variable Cultivation\_\_static\_1\_dynamic\_2\_ Entered: R-Square = 0.7105 and C(p) = 4.0000*

| Analysis of Variance |    |                |             |         |        |
|----------------------|----|----------------|-------------|---------|--------|
| Source               | DF | Sum of Squares | Mean Square | F Value | Pr > F |
| Model                | 3  | 122845         | 40948       | 62.18   | <.0001 |
| Error                | 76 | 50051          | 658.55942   |         |        |
| Corrected Total      | 79 | 172896         |             |         |        |

| Variable                         | Parameter Estimate | Standard Error | Type II SS | F Value | Pr > F |
|----------------------------------|--------------------|----------------|------------|---------|--------|
| Intercept                        | 81.14600           | 17.34848       | 14408      | 21.88   | <.0001 |
| Day                              | -8.38766           | 1.12021        | 36921      | 56.06   | <.0001 |
| Concentration                    | 5.66560            | 0.57383        | 64198      | 97.48   | <.0001 |
| Cultivation__static_1_dynamic_2_ | -32.95900          | 5.73829        | 21726      | 32.99   | <.0001 |

*Bounds on condition number: 1, 9*

*All variables left in the model are significant at the 0.1500 level.*

*All variables have been entered into the model.*

Summary of Stepwise Selection

| Step | Variable Entered                  | Variable Removed | Label         | Number Vars In | Partial R-Square | Model R-Square | C(p)    | F Value | Pr > F |
|------|-----------------------------------|------------------|---------------|----------------|------------------|----------------|---------|---------|--------|
| 1    | Concentration                     |                  | Concentration | 1              | 0.3713           | 0.3713         | 89.0535 | 46.07   | <.0001 |
| 2    | Day                               |                  | Day           | 2              | 0.2135           | 0.5849         | 34.9901 | 39.61   | <.0001 |
| 3    | Cultivation__static_1_dynamic_2__ |                  | Cultivation   | 3              | 0.1257           | 0.7105         | 4.0000  | 32.99   | <.0001 |

Model: MODEL1  
Dependent Variable: Area Area

Fit Diagnostics for Area

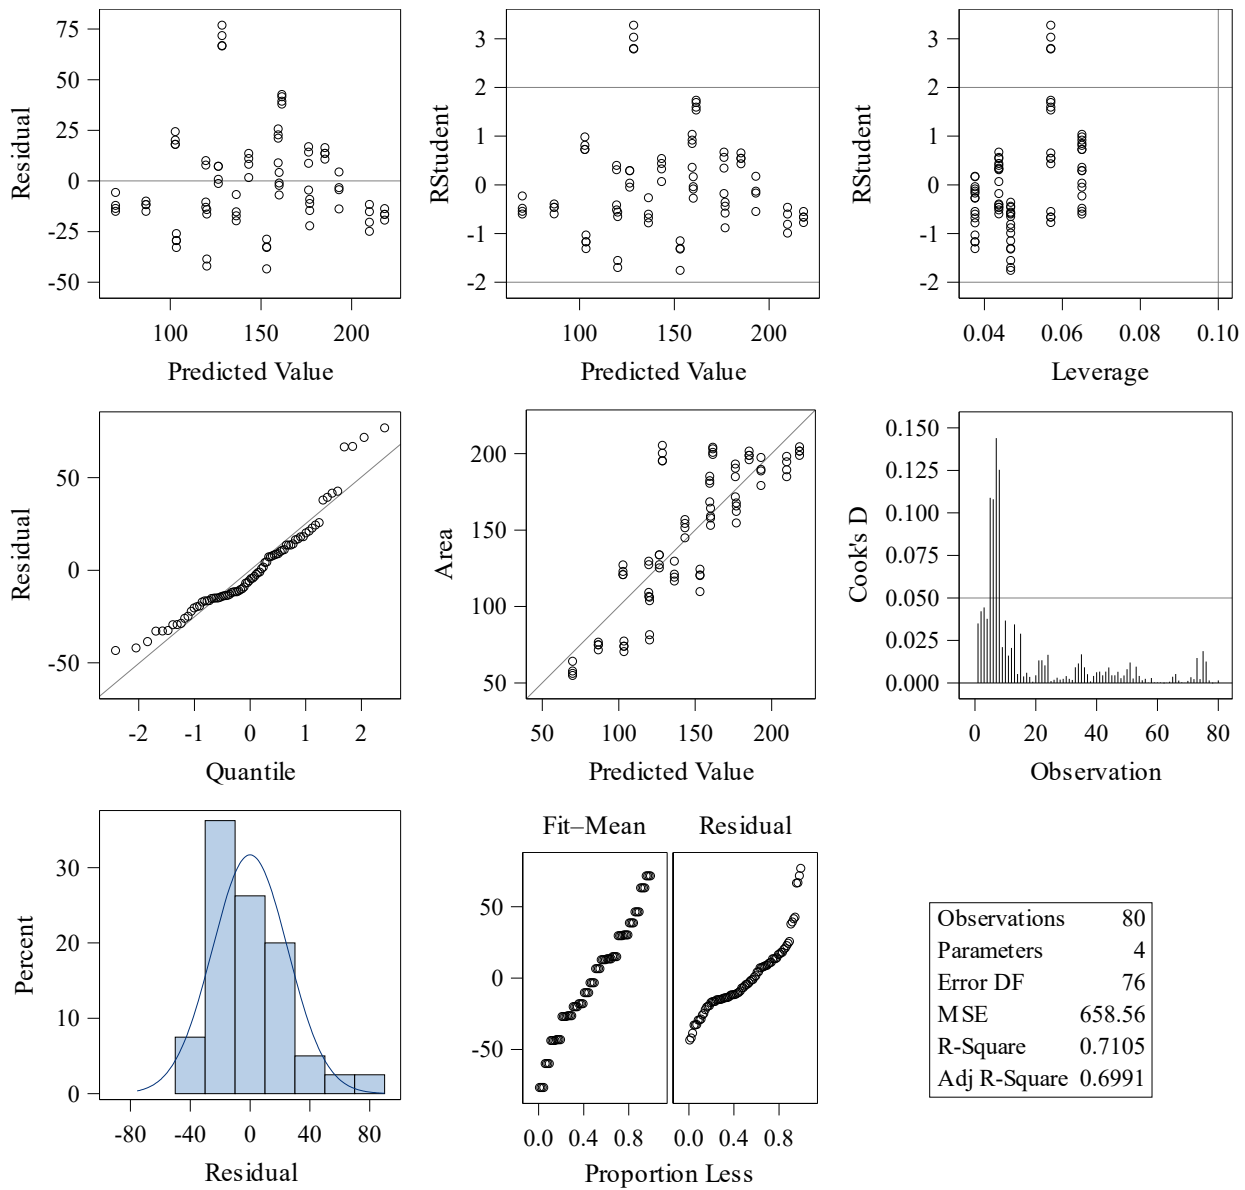

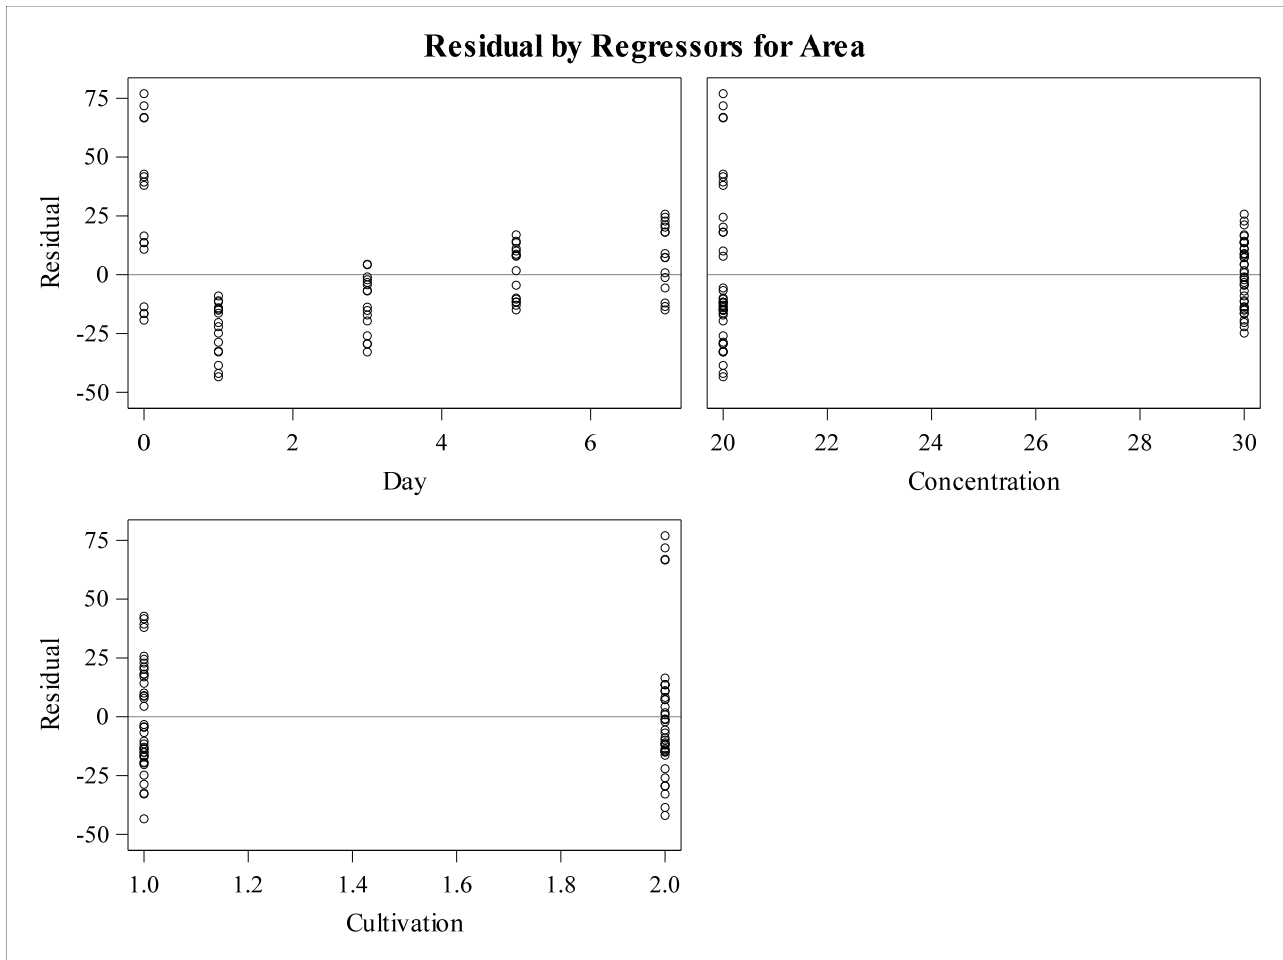

***Additional evaluations***

***Proliferation medium***

***Linear Regression of Thickness by Day, Concentration a Cultivation***

***Model: MODEL1***

***Dependent Variable: Thickness Thickness***

|                                    |    |
|------------------------------------|----|
| <b>Number of Observations Read</b> | 80 |
| <b>Number of Observations Used</b> | 80 |

***Stepwise Selection: Step 1***

***Variable Day Entered: R-Square = 0.4804 and C(p) = 72.6053***

| Analysis of Variance   |    |                |             |         |        |
|------------------------|----|----------------|-------------|---------|--------|
| Source                 | DF | Sum of Squares | Mean Square | F Value | Pr > F |
| <b>Model</b>           | 1  | 0.39633        | 0.39633     | 72.11   | <.0001 |
| <b>Error</b>           | 78 | 0.42872        | 0.00550     |         |        |
| <b>Corrected Total</b> | 79 | 0.82505        |             |         |        |

| Variable         | Parameter Estimate | Standard Error | Type II SS | F Value | Pr > F |
|------------------|--------------------|----------------|------------|---------|--------|
| <b>Intercept</b> | 1.19431            | 0.01326        | 44.55758   | 8106.70 | <.0001 |
| <b>Day</b>       | -0.02748           | 0.00324        | 0.39633    | 72.11   | <.0001 |

*Bounds on condition number: 1, 1*

*Stepwise Selection: Step 2*

*Variable Cultivation\_\_static\_1\_dynamic\_2\_ Entered: R-Square = 0.6326 and C(p) = 31.0651*

| Analysis of Variance   |    |                |             |         |        |
|------------------------|----|----------------|-------------|---------|--------|
| Source                 | DF | Sum of Squares | Mean Square | F Value | Pr > F |
| <b>Model</b>           | 2  | 0.52194        | 0.26097     | 66.30   | <.0001 |
| <b>Error</b>           | 77 | 0.30311        | 0.00394     |         |        |
| <b>Corrected Total</b> | 79 | 0.82505        |             |         |        |

| Variable                                | Parameter Estimate | Standard Error | Type II SS | F Value | Pr > F |
|-----------------------------------------|--------------------|----------------|------------|---------|--------|
| <b>Intercept</b>                        | 1.31319            | 0.02385        | 11.93301   | 3031.41 | <.0001 |
| <b>Day</b>                              | -0.02748           | 0.00274        | 0.39633    | 100.68  | <.0001 |
| <b>Cultivation__static_1_dynamic_2_</b> | -0.07925           | 0.01403        | 0.12561    | 31.91   | <.0001 |

*Bounds on condition number: 1, 4*

*Stepwise Selection: Step 3*

*Variable Concentration Entered: R-Square = 0.7343 and C(p) = 4.0000*



| Analysis of Variance |    |                |             |         |        |
|----------------------|----|----------------|-------------|---------|--------|
| Source               | DF | Sum of Squares | Mean Square | F Value | Pr > F |
| Model                | 3  | 0.60579        | 0.20193     | 69.99   | <.0001 |
| Error                | 76 | 0.21926        | 0.00288     |         |        |
| Corrected Total      | 79 | 0.82505        |             |         |        |

| Variable                          | Parameter Estimate | Standard Error | Type II SS | F Value | Pr > F |
|-----------------------------------|--------------------|----------------|------------|---------|--------|
| Intercept                         | 1.15131            | 0.03631        | 2.90041    | 1005.36 | <.0001 |
| Day                               | -0.02748           | 0.00234        | 0.39633    | 137.38  | <.0001 |
| Concentration                     | 0.00648            | 0.00120        | 0.08385    | 29.07   | <.0001 |
| Cultivation__static_1_dynamic_2__ | -0.07925           | 0.01201        | 0.12561    | 43.54   | <.0001 |

*Bounds on condition number: 1, 9*

*All variables left in the model are significant at the 0.1500 level.*

*All variables have been entered into the model.*

| Summary of Stepwise Selection |                                   |                  |               |                |                  |                |         |         |        |
|-------------------------------|-----------------------------------|------------------|---------------|----------------|------------------|----------------|---------|---------|--------|
| Step                          | Variable Entered                  | Variable Removed | Label         | Number Vars In | Partial R-Square | Model R-Square | C(p)    | F Value | Pr > F |
| 1                             | Day                               |                  | Day           | 1              | 0.4804           | 0.4804         | 72.6053 | 72.11   | <.0001 |
| 2                             | Cultivation__static_1_dynamic_2__ |                  | Cultivation   | 2              | 0.1522           | 0.6326         | 31.0651 | 31.91   | <.0001 |
| 3                             | Concentration                     |                  | Concentration | 3              | 0.1016           | 0.7343         | 4.0000  | 29.07   | <.0001 |

**Model: MODEL1**

**Dependent Variable: Thickness Thickness**

### Fit Diagnostics for Thickness

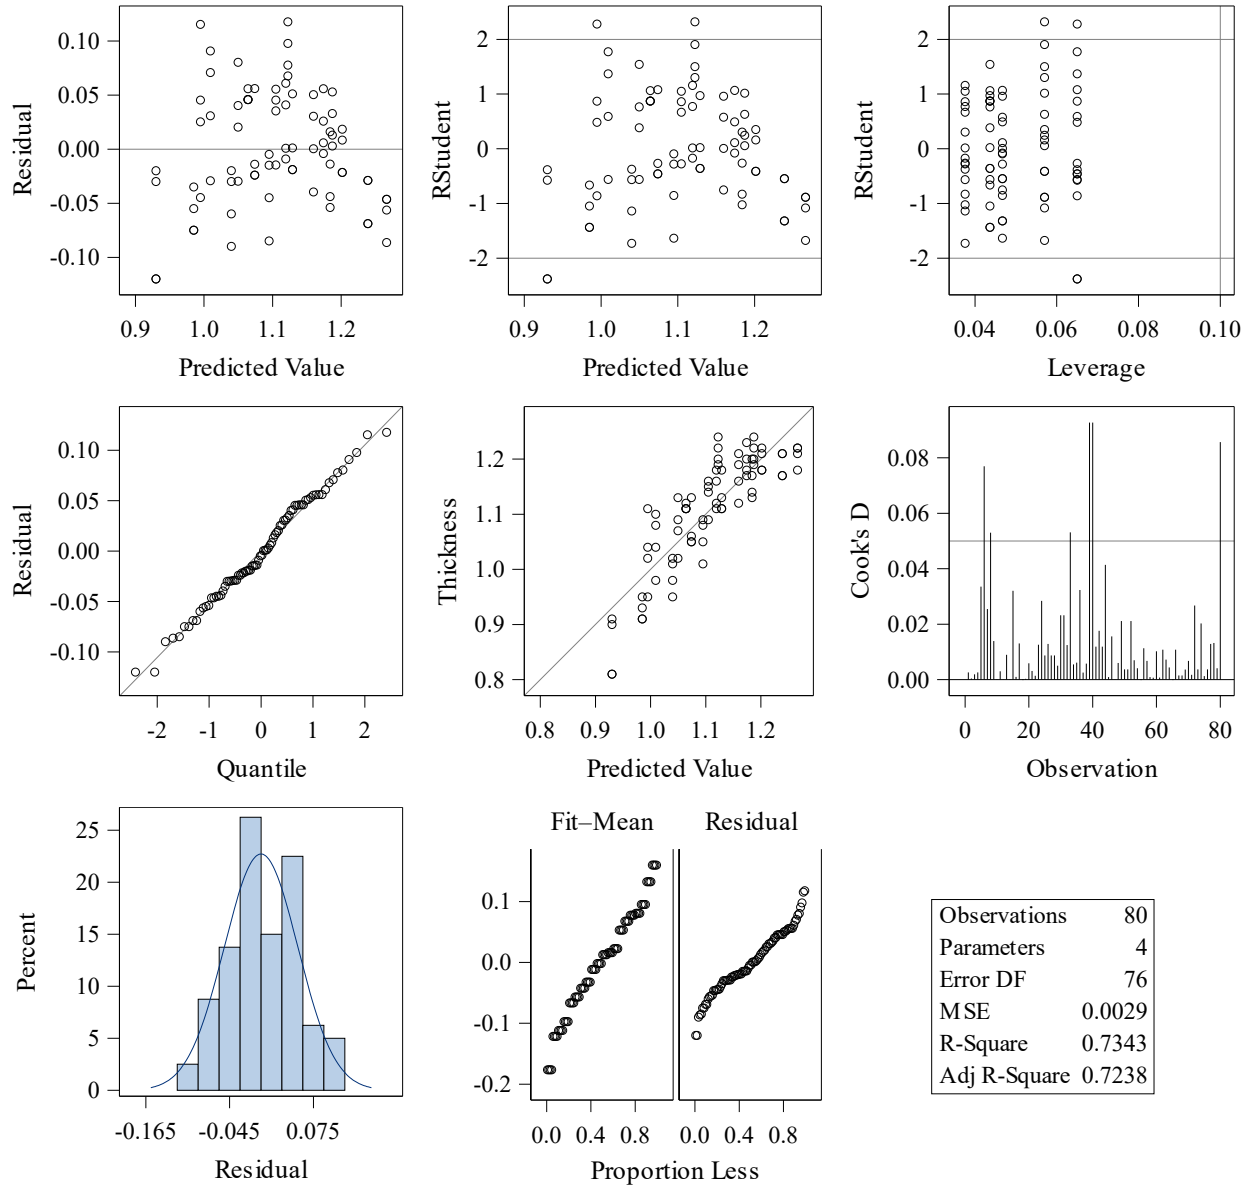

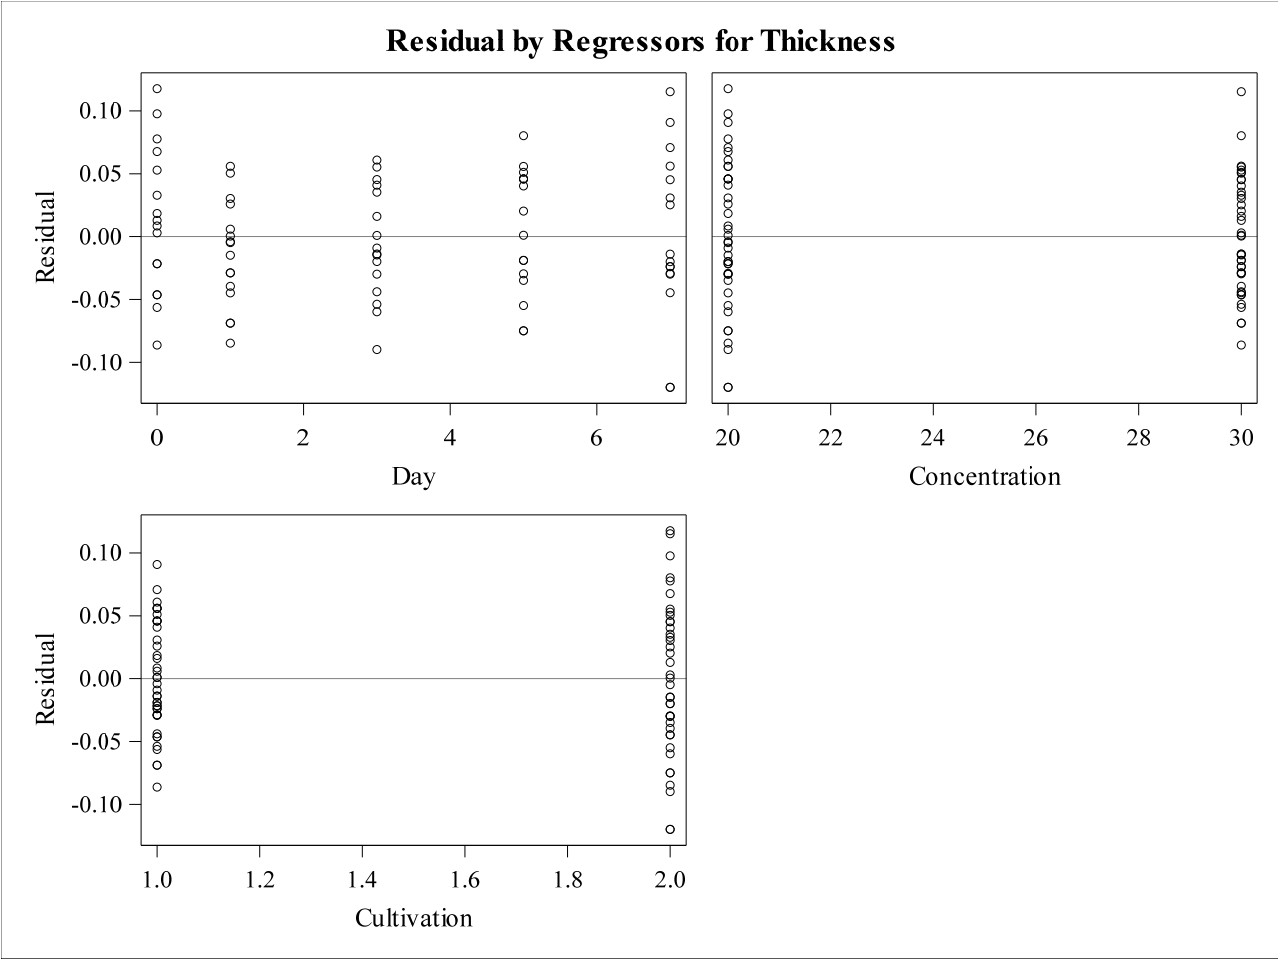

***Additional evaluations***  
***Differentiation medium SMC***  
***Linear Regression of Area by Concentration, Day, Print Height and Cultivation***

***Model: MODEL1***  
***Dependent Variable: Area Area***

|                             |     |
|-----------------------------|-----|
| Number of Observations Read | 128 |
| Number of Observations Used | 128 |

***Stepwise Selection: Step 1***

***Variable Day Entered: R-Square = 0.7354 and C(p) = 23.4268***

| Analysis of Variance   |     |                |             |         |        |
|------------------------|-----|----------------|-------------|---------|--------|
| Source                 | DF  | Sum of Squares | Mean Square | F Value | Pr > F |
| <b>Model</b>           | 1   | 453606         | 453606      | 350.27  | <.0001 |
| <b>Error</b>           | 126 | 163172         | 1295.01916  |         |        |
| <b>Corrected Total</b> | 127 | 616778         |             |         |        |

| Variable         | Parameter Estimate | Standard Error | Type II SS | F Value | Pr > F |
|------------------|--------------------|----------------|------------|---------|--------|
| <b>Intercept</b> | 176.79051          | 4.89972        | 1685978    | 1301.89 | <.0001 |
| <b>Day</b>       | -31.00047          | 1.65641        | 453606     | 350.27  | <.0001 |

*Bounds on condition number: 1, 1*

*Stepwise Selection: Step 2*

*Variable Concentration Entered: R-Square = 0.7775 and C(p) = 1.9792*

| Analysis of Variance   |     |                |             |         |        |
|------------------------|-----|----------------|-------------|---------|--------|
| Source                 | DF  | Sum of Squares | Mean Square | F Value | Pr > F |
| <b>Model</b>           | 2   | 479558         | 239779      | 218.42  | <.0001 |
| <b>Error</b>           | 125 | 137221         | 1097.76467  |         |        |
| <b>Corrected Total</b> | 127 | 616778         |             |         |        |

| Variable             | Parameter Estimate | Standard Error | Type II SS | F Value | Pr > F |
|----------------------|--------------------|----------------|------------|---------|--------|
| <b>Intercept</b>     | 105.59559          | 15.32180       | 52141      | 47.50   | <.0001 |
| <b>Concentration</b> | 2.84780            | 0.58571        | 25952      | 23.64   | <.0001 |
| <b>Day</b>           | -31.00047          | 1.52505        | 453606     | 413.21  | <.0001 |

*Bounds on condition number: 1, 4*

*All variables left in the model are significant at the 0.1500 level.*

*No other variable met the 0.1500 significance level for entry into the model.*

| Summary of Stepwise Selection |                  |                  |               |                |                  |                |         |         |        |
|-------------------------------|------------------|------------------|---------------|----------------|------------------|----------------|---------|---------|--------|
| Step                          | Variable Entered | Variable Removed | Label         | Number Vars In | Partial R-Square | Model R-Square | C(p)    | F Value | Pr > F |
| 1                             | Day              |                  | Day           | 1              | 0.7354           | 0.7354         | 23.4268 | 350.27  | <.0001 |
| 2                             | Concentration    |                  | Concentration | 2              | 0.0421           | 0.7775         | 1.9792  | 23.64   | <.0001 |

Model: MODEL1  
Dependent Variable: Area Area

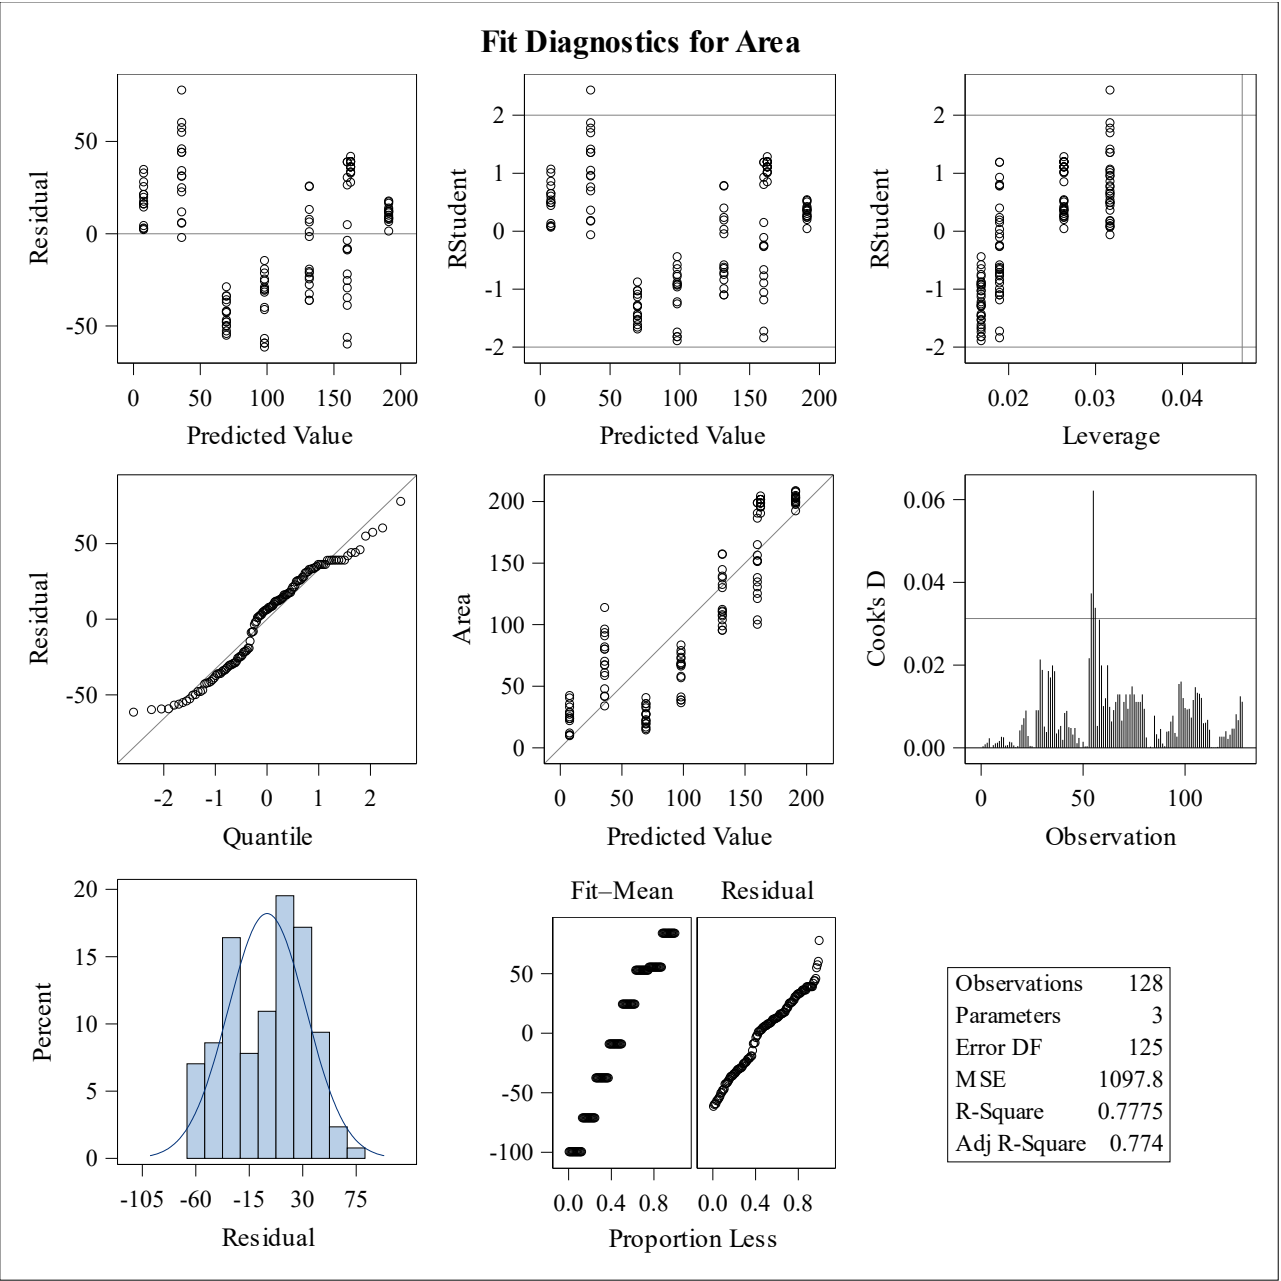

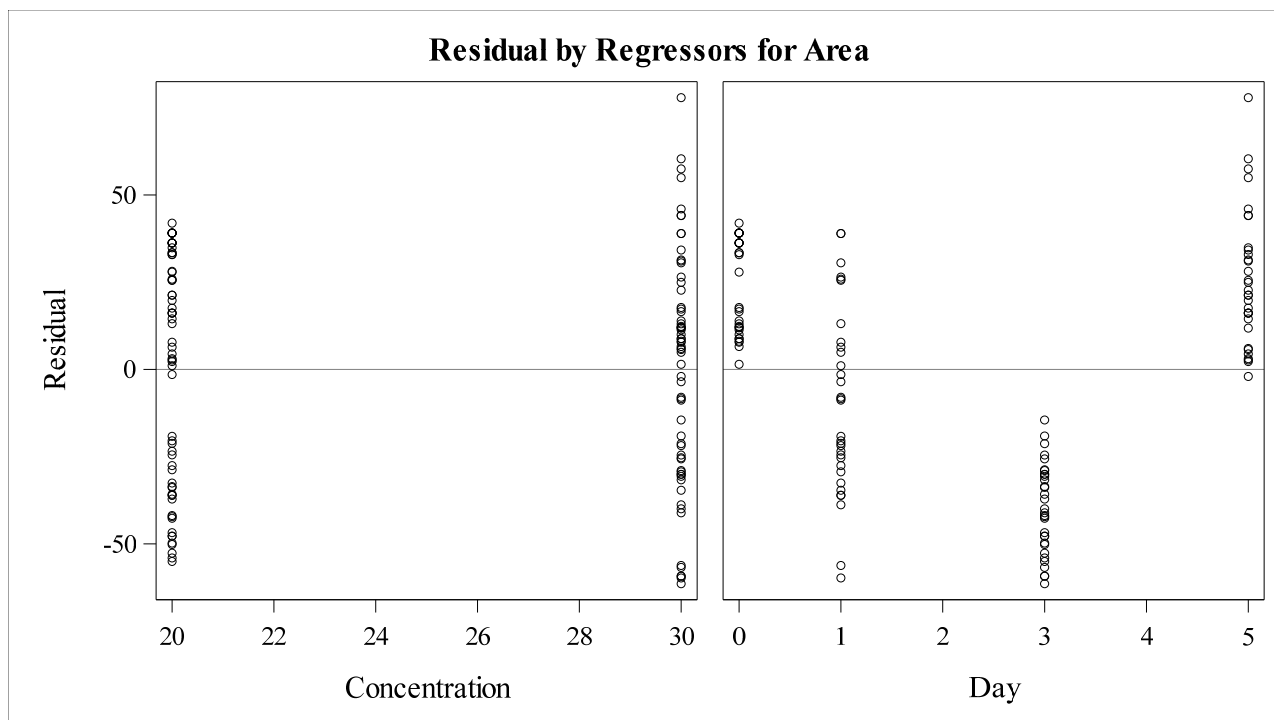

### *Additional evaluations*

#### *Differentiation medium SMC*

#### *Linear Regression of Thickness by Concentration, Day, Print Height and Cultivation*

**Model: MODEL1**

**Dependent Variable: Thickness Thickness**

|                             |     |
|-----------------------------|-----|
| Number of Observations Read | 128 |
| Number of Observations Used | 128 |

#### *Stepwise Selection: Step 1*

**Variable Print\_height Entered: R-Square = 0.7065 and C(p) = 159.9157**

| Analysis of Variance |     |                |             |         |        |
|----------------------|-----|----------------|-------------|---------|--------|
| Source               | DF  | Sum of Squares | Mean Square | F Value | Pr > F |
| Model                | 1   | 4.73935        | 4.73935     | 303.33  | <.0001 |
| Error                | 126 | 1.96870        | 0.01562     |         |        |
| Corrected Total      | 127 | 6.70806        |             |         |        |

| Variable     | Parameter Estimate | Standard Error | Type II SS | F Value | Pr > F |
|--------------|--------------------|----------------|------------|---------|--------|
| Intercept    | 0.02125            | 0.05634        | 0.00222    | 0.14    | 0.7067 |
| Print_height | 0.96211            | 0.05524        | 4.73935    | 303.33  | <.0001 |

*Bounds on condition number: 1, 1*

*Stepwise Selection: Step 2*

*Variable Cultivation\_thickness\_\_static\_\_1 Entered: R-Square = 0.8576 and C(p) = 15.7497*

| Analysis of Variance |     |                |             |         |        |
|----------------------|-----|----------------|-------------|---------|--------|
| Source               | DF  | Sum of Squares | Mean Square | F Value | Pr > F |
| Model                | 2   | 5.75288        | 2.87644     | 376.43  | <.0001 |
| Error                | 125 | 0.95517        | 0.00764     |         |        |
| Corrected Total      | 127 | 6.70806        |             |         |        |

| Variable                         | Parameter Estimate | Standard Error | Type II SS | F Value | Pr > F |
|----------------------------------|--------------------|----------------|------------|---------|--------|
| Intercept                        | 0.02125            | 0.03940        | 0.00222    | 0.29    | 0.5906 |
| Print_height                     | 0.96211            | 0.03863        | 4.73935    | 620.22  | <.0001 |
| Cultivation_thickness__static__1 | -0.08898           | 0.00773        | 1.01353    | 132.64  | <.0001 |

*Bounds on condition number: 1, 4*

*Stepwise Selection: Step 3*

*Variable Day Entered: R-Square = 0.8727 and C(p) = 3.1714*

| Analysis of Variance |     |                |             |         |        |
|----------------------|-----|----------------|-------------|---------|--------|
| Source               | DF  | Sum of Squares | Mean Square | F Value | Pr > F |
| Model                | 3   | 5.85397        | 1.95132     | 283.30  | <.0001 |
| Error                | 124 | 0.85408        | 0.00689     |         |        |
| Corrected Total      | 127 | 6.70806        |             |         |        |

| Variable                         | Parameter Estimate | Standard Error | Type II SS | F Value | Pr > F |
|----------------------------------|--------------------|----------------|------------|---------|--------|
| Intercept                        | 0.05418            | 0.03838        | 0.01373    | 1.99    | 0.1606 |
| Day                              | -0.01463           | 0.00382        | 0.10109    | 14.68   | 0.0002 |
| Print_height                     | 0.96211            | 0.03668        | 4.73935    | 688.08  | <.0001 |
| Cultivation_thickness__static__1 | -0.08898           | 0.00734        | 1.01353    | 147.15  | <.0001 |

*Bounds on condition number: 1, 9*

*All variables left in the model are significant at the 0.1500 level.*

*No other variable met the 0.1500 significance level for entry into the model.*

| Summary of Stepwise Selection |                                  |                  |              |                |                  |                |         |         |        |
|-------------------------------|----------------------------------|------------------|--------------|----------------|------------------|----------------|---------|---------|--------|
| Step                          | Variable Entered                 | Variable Removed | Label        | Number Vars In | Partial R-Square | Model R-Square | C(p)    | F Value | Pr > F |
| 1                             | Print_height                     |                  | Print_height | 1              | 0.7065           | 0.7065         | 159.916 | 303.33  | <.0001 |
| 2                             | Cultivation_thickness__static__1 |                  | Cultivation  | 2              | 0.1511           | 0.8576         | 15.7497 | 132.64  | <.0001 |
| 3                             | Day                              |                  | Day          | 3              | 0.0151           | 0.8727         | 3.1714  | 14.68   | 0.0002 |

**Model: MODEL1**

**Dependent Variable: Thickness Thickness**



### Fit Diagnostics for Thickness

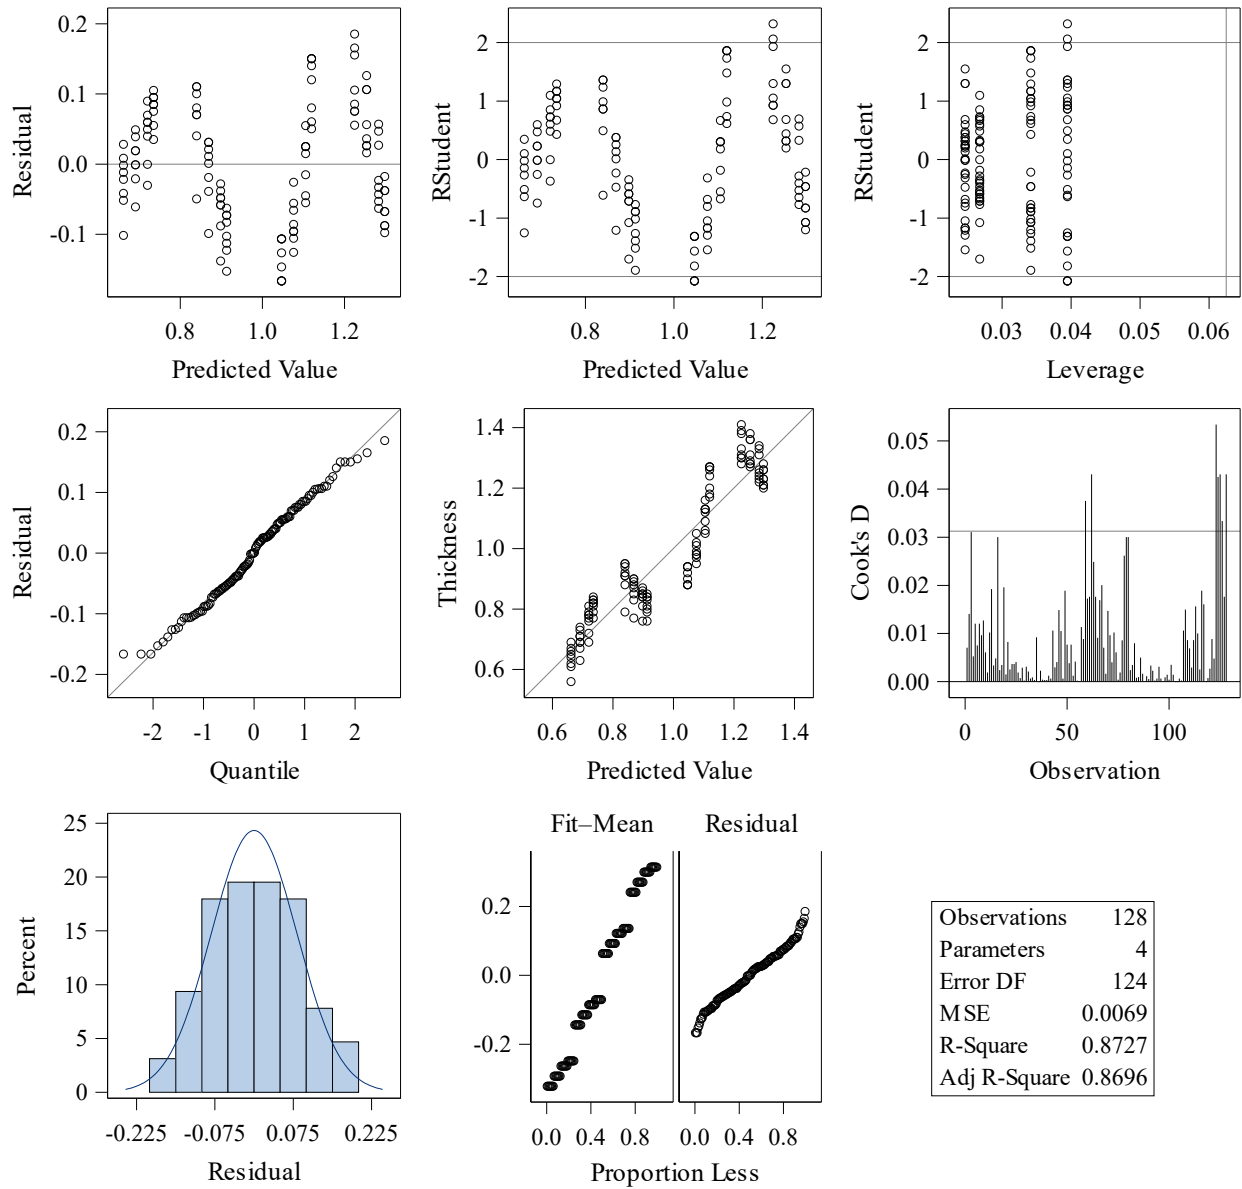

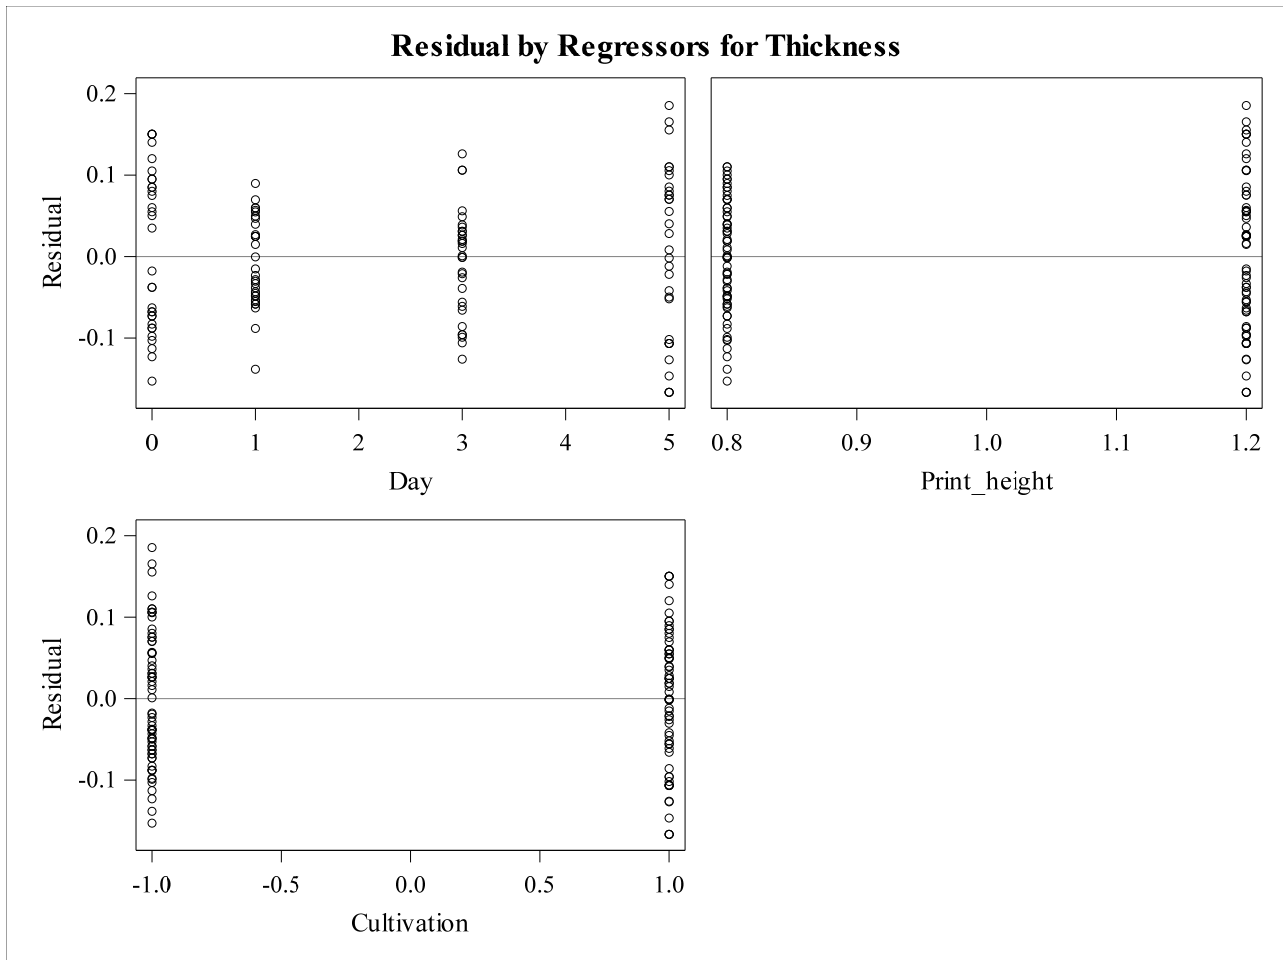

Supplement: s1 [file s1]
